# Supplementary material for: A haplotype-resolved pangenome of the barley wild relative Hordeum bulbosum
Source: Research Square preprint supplement (doi:10.21203/rs.3.rs-3916840/v1), 2024-02-08
Supplement: Supplementary file 1 [file 1e10ec4e467168fbdedc2da6.xlsx]

## Sheet: Sheet1
Number	Accession	Ploidy	Heterozygosity Rate	Est. ratio of repeats	Collection	N50	Assembly Size	unanchor size	Genome size (haplotype + unanchor)	Phasing and saccfolding proportion	Chloroplast genome size	Busco (Poaceae)	Gene Number(HC)	Busco (Poaceae)	LAI	Repeat content	Base pair QV	k-mer completeness(%)
1	FB19-011-3	diploid	0.00767326	0.379677	Greece	9815163	6938833664	161061028	7372564534	0.976788	136709	0.983	70308	0.983	20.523	0.850668	66.1725	95.1398
2	FB20-029-7	diploid	0.00382677	0.407359	Spain	17010316	5447803537	287052009	7453294785	0.947309	136650	0.98	79203	0.98	19.6297	0.855581	68.4101	97.3588
3	FB20-005-1	diploid	0.00855571	0.382971	Italy	10869556	7328144610	524373709	7429476777	0.928444	136703	0.982	80663	0.982	19.559	0.854292	69.9324	97.7031
4	PI365428	diploid	0.0072446	0.384627	Libya	7784270	7263405625	366384864	7326846373	0.949557	136692	0.982	76537	0.982	20.1881	0.855667	68.974	97.1374
5	FB19-001-1	Autotetraploid	0.00599647	0.486136	Greece	7825737	13324708682	1582418697	14217380662	0.881242	136737	0.985	158226	0.985	18.7864	0.852075	69.1106	96.7056
6	FB19-028-3	Autotetraploid	0.006846	0.455663	Greece	7701759	14140378421	1308300202	14606871287	0.907478	136702	0.986	159089	0.986	19.1579	0.850087	68.1095	96.6084
7	GRA2256-1	Autotetraploid	0.00848704	0.450947	Tajikistan	7171554	12741442188	1086622052	14165343809	0.914717	136623	0.987	149449	0.987	19.1201	0.860894	68.8692	97.1753
8	A17	Autotetraploid	0.00659597	0.451141	Unknown	8715686	11404614139	911595033	14090512412	0.920068	136621	0.986	150892	0.986	18.6831	0.8537	68.4526	96.1221
9	A40	Autotetraploid	0.00803509	0.442569	Unknown	5979957	14236991145	1208974604	14411505439	0.915082	136682	0.987	153137	0.987	19.7143	0.853798	69.1593	96.6186
10	A42	Autotetraploid	0.00807519	0.440012	Unknown	6412427	14147880937	1472181425	14402551853	0.895943	136684	0.989	152921	0.989	19.2028	0.860133	69.2088	96.5681
