# Supplementary material for: A haplotype-resolved pangenome of the barley wild relative Hordeum bulbosum
Source: Research Square preprint supplement (doi:10.21203/rs.3.rs-3916840/v1), 2024-02-08
Supplement: Supplementary file 2 [file 4fbff79b31b3c89ea81b6db9.pdf]

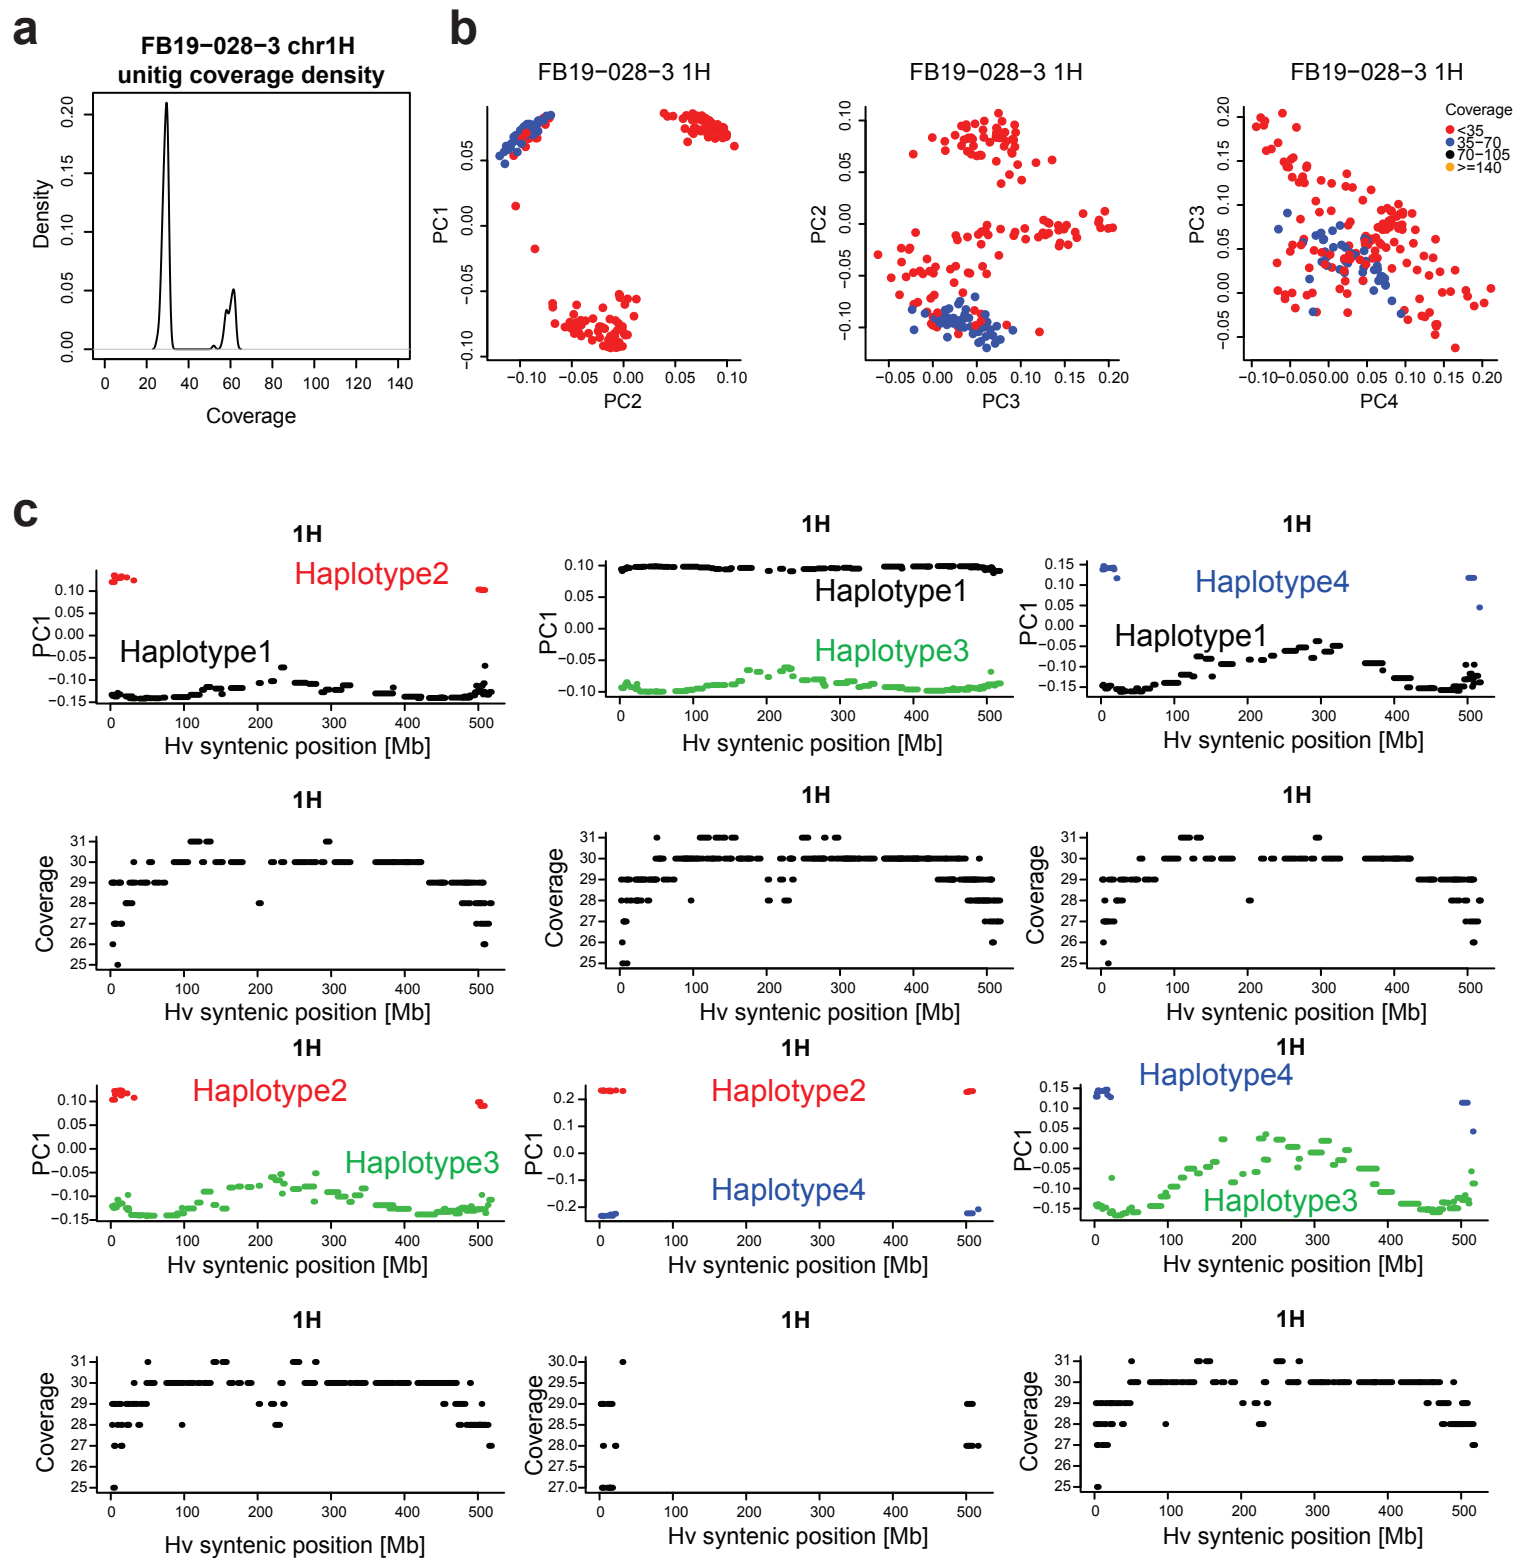

**Extended Data Fig. 5. Haplotype phasing of autotetraploid *H. bulbosum* genomes.** (a) Distribution of sequence coverage of contigs in the unphased assembly. Contigs that are shared between two haplotypes have double coverage (right-hand peak). (b) PCA clustering of the matrix of Hi-C links connecting the ends of contigs, i.e. those mapped to within 2 Mb of either contig end. Chromosome 1H of the tetraploid clone FB19-028-3 is shown. Colors correspond to coverage brackets. The contigs with double coverage (shown in blue) correspond to IBD regions shared between two haplotypes. (c) PCA separation and contig-level coverage on chromosome 1H of FB19-028-3 after pseudomolecule construction and manual curation. Pairwise differences between the four haplotypes are shown.
