# Supplementary material for: A haplotype-resolved pangenome of the barley wild relative Hordeum bulbosum
Source: Research Square preprint supplement (doi:10.21203/rs.3.rs-3916840/v1), 2024-02-08
Supplement: Supplementary file 2 [file 219092e6135b9c499bdce295.xlsx]

## Sheet: Sheet1
Molecules	Raw data ˃ 150 kb (Gb)	1539.8
	Filtered molecules N50 (kb)	229.6
	Effective molecule coverage	146x
Map assembly	No. of contigs	859
	Assembly length (Mb)	6214
	Contig N50 (Mb)	25.7
