# Supplementary material for: A haplotype-resolved pangenome of the barley wild relative Hordeum bulbosum
Source: Research Square preprint supplement (doi:10.21203/rs.3.rs-3916840/v1), 2024-02-08
Supplement: Supplementary file 3 [file 24a72c8f1a66cf6494d750f7.docx]

**Online Methods**

*Sample collection*

*Hordeum bulbosum* populations in the Central and Western Mediterranean were visited between end of May and early October and about 10 ripe spikelets each of three to seven individuals throughout each population were collected, bagged individually per mother plant, and transported to Gatersleben. Seeds were germinated in pots and one seedling per mother plant and three to five seedlings per population were further grown, regularly repotted and kept till flowering stage. With the onset of flowering, the individuals belonging to the same population were put together in isolation greenhouses to obtain seeds. The population samples were complemented by accessions from germplasm collections of the gene banks of IPK Gatersleben and US Department of Agriculture to also represent genotypes from northern Africa and western Asia. Ploidy levels of all individuals were determined by flow cytometry on a Cyflow Space (Sysmex Partec, Germany) essentially following the procedure described previously1. Collecting and exchange of seeds followed the regulations of the respective countries and Nagoya agreements for material exchange. One herbarium voucher for each population was deposited in the herbarium of the IPK Gatersleben (GAT).

*DNA extraction for genome sequencing*

DNA extraction for reduced representation libraries and Illumina short-read sequencing was conducted with DNeasy Plant Mini kits (Qiagen, Germany) from young leaves dried in silica gel. DNA extraction followed the protocol of the manufacturer. DNA quality was checked on agarose gels and for quantification the Qubit dsDNA High Sensitivity assay kit (Thermo Fisher Scientific, MA, USA) was used.

To obtain high-molecular weight (HMW) DNA for long-read sequencing 8 g leaf tissue were collected per individual, ground with liquid nitrogen to a fine powder and stored at -80 oC. HMW DNA was purified from the powder, essentially as described in Dvorak et al.2. Briefly, nuclei were isolated, digested with proteinase K and lysed with SDS. Here, a standard watercolor brush with synthetic hair (size 8) was used to re-suspend the nuclei for digestion and lysis. HMW DNA was purified using phenol-chloroform extraction and precipitation with ethanol2. Subsequently, the HMW DNA was dissolved in 50 ml TE (pH 8,0) and precipitated by the addition of 5 ml 3 M sodium acetate (pH 5,2) and 100 ml ice-cold ethanol. The suspension was mixed by slow circular movements resulting in the formation of a white precipitate (HMW DNA), which was collected using a wide-bore 5 ml pipette tip and transferred for 30 sec into a tube containing 5 ml 75% ethanol. The washing was repeated twice. The HMW DNA was transferred into a 2 ml tube using a wide-bore tip, collected with a polystyrene spatula, air-dried in a fresh 2 ml tube and dissolved in 500 µl 10 mM Tris-Cl (pH 8.0). For quantification the Qubit dsDNA High Sensitivity assay kit (Thermo Fisher Scientific, MA, USA) was used. The DNA size-profile was recorded using the Femto Pulse system and the Genomic DNA 165 kb kit (Agilent Technologies Inc, CA, USA). In typical experiments the peak of the size-profile of the HMW DNA for library preparation was around 165 kb.

*HiFi sequencing*

High molecular weight DNA was provided to the University of Wisconsin Biotechnology Center DNA Sequencing Facility. The quality of the extracted DNA was measured on a NanoDrop™ One instrument (ThermoFisher Scientific). Concentrations, 260/230 ratios, and 260/280 ratios were logged. Quantification of the extracted DNA was measured using the Qubit™ dsDNA High Sensitivity kit (ThermoFisher Scientific). Samples were diluted before running on the Agilent FemtoPulse System to assess DNA sizing and quality. A Pacific Biosciences HiFi library was prepared according to PN 101-853-100 Version 03 (Pacific Biosciences). Modifications include shearing with Covaris gTUBEs and size selecting with Sage Sciences BluePippin. Library quality was assessed using the Agilent FemtoPulse System. Library was quantified using the Qubit™ dsDNA High Sensitivity kit. The library was sequenced on a Sequel II using Sequel Polymerase Binding Kit 2.2 at the University of Wisconsin–Madison Biotechnology Center DNA Sequencing Facility.

*Hi-C sequencing*

*In situ* Hi-C libraries were prepared from young seedlings according to the previously published protocol, using *Dpn*II for the digestion of crosslinked chromatin2. Sequencing and Hi-C raw data processing was performed as described before3,4.

*GBS library construction and sequencing*

GBS library construction using *Pst*I and *Msp*I (NEB, Ipswich, UK) was essentially as described previously. Samples were provided with unique dual barcodes and sequenced (1 x 107 cycles, single read) involving a custom sequencing primer5 on the Illumina NovaSeq 6000 device (Illumina, San Diego, CA, USA).

*Transcriptomics*

Clones of individual FB19-011-3 were grown in a greenhouse at the Leibniz Institute of Plant Genetics and Crop Plant Research. Tissue samples of root, bulb, leaf, stalk, flag leaf and young inflorescenses (including flowers) were harvested, frozen in liquid nitrogen and stored at -80 °C. Both leaf tissues were obtained at the end of the night to reduce the number of photosynthesis-related transcripts in the extracted RNA. Total RNA was isolated with the RNeasy Plant Mini kit (Qiagen, Germany) following the instructions provided by the manufacturer. Quality was determined by spectrophotometry, and RNA integrity using the RNA ScreenTape Assay on a Agilent 4200 TapeStation System (Agilent Technologies). RNA-seq libraries were constructed from 500 ng total RNA using the Illumina Stranded mRNA Prep Ligation Kit (Illumina Inc., San Diego, CA, USA) according to the manufacturer’s protocol. The libraries were sequenced (XP workflow, paired-end, 2x109 cycles) on an Illumina NovaSeq 6000 device according to standard manufacturer’s protocols (Illumina Inc., San Diego, CA, USA). RNAs of the single-tissue samples were pooled for Iso-Seq. The Iso-Seq library was constructed from 500 ng total RNA following the Iso-Seq Express 2.0 workflow as described by the manufacturer (Pacific Biosciences of California Inc., Menlo Park, CA, USA). The cDNA was amplified by 3 additional PCR cycles as recommended by the manufacturer. The Iso-Seq library (average size: 2.5 kb) was sequenced using the PacBio Sequel IIe device (24 h movie time, 100 pM loading concentration, 2 h pre-extension time, diffusion loading) following standard manufacturer’s protocols (Pacific Biosciences of California Inc., Menlo Park, CA, USA).

*Diploid genome assembly*

HiFi reads were assembled with hifiasm (0.13-r308)6. Unitigs were used as input for pseudomolecule construction. The GFA output was converted to FASTA format with gfatools (https://github.com/lh3/gfatools)https://github.com/lh3/gfatools. Hi-C reads were aligned to the unitigs using the TRITEX pipeline7. High-confidence gene models annotated on the barley Morex V3 assembly8 were used as a guide map. The gene sequences were aligned to the unitigs with GMAP9. Unitigs were assigned to chromosomes using the guide map and Hi-C information. A Hi-C matrix considering only reads mapping within 2 Mb of contig borders was constructed. The Hi-C matrix was normalized with a linear model to remove positional effects arising from the Rabl configuration as described by Mascher et al.10 A PCA was run on the normalized Hi-C matrix in a chromosome-wise manner considering only contigs longer than 1 Mb. Separation on the first principal component (PC) was used to group the unitigs into haplotypes. Smaller or otherwise unphased contigs were assigned to haplotypes with Hi-C information based on majority rule. Haplotype-wise pseudomolecule construction was done with TRITEX7,11. Hi-C contact matrices were visually inspected and, if necessary, corrected for positional placement and chromosomal and haplotypical assignment as described by Marone et al.7

*Optical map for the diploid clone FB19-011-3*

The optical map was constructed on the platform of Bionano Genomics following procedures described by Mascher et al.8 with several modifications. Briefly, high molecular weight DNA was prepared from 2.5 million nuclei released from young leaves and purified by flow cytometry as described in Šimková et al.12. Next, 525 ng DNA were directly labeled at DLE-1 sites and analyzed on a Saphyr instrument (Bionano Genomics, San Diego, USA). Collected 1.54 Tbp of single molecule data with N50 of 230 kb provided 146x effective coverage of the *H. bulbosum* *FB19-011-3* genome. The data was *de novo* assembled by Bionano Solve 3.6.1_11162020, applying the configuration file “*optArguments_nonhaplotype_noES_noCut_BG_DLE1_saphyr.xml*”. A pValue threshold 1e-12 was used to build the initial assembly, pValue 1e-13 for extension and refinement steps (5 rounds), and pValue 1e-17 for the final merging of maps. To increase the contiguity of the sequence assembly, automatic hybrid scaffold pipeline integrated in Bionano Solve 3.6.1_11162020 was run with the *de novo* optical map assembly. Default *DLE-1 Hybrid Scaffold* configuration file was used with the “Resolve conflict” option for conflict resolution. Scaffolding was performed for either of the two FB19-011-3 haplotypes. The validity of each link in the hybrid scaffolds was assessed on case-by-case manner through inspection of Hi-C contact matrices and the genetic map from pollen sequencing. Valid links resulted in the correction of contig placements and orientations and the incorporation of previously unplaced contigs into the Hi-C map. Manual editing of the Hi-C map was done as described by Marone et al.7

*Flow sorting and sequencing of single pollen nuclei*

Anthers with mature pollen grains of 20 – 30 *H. bulbosum* FB19-011-3 florets were collected in 1.5 ml Eppendorf tube and the corresponding nuclei were isolated by applying the filter bursting method13 using nuclei isolation buffer according to Galbraith et al.14 and CellTrics disposable filters of 100 μm and 20 μm (SYSMEX). The resulting nuclei suspension was stained with propidium iodide (50 µg/ml, PI) and analyzed on a BD Influx (BD Biosciences) by blotting the PI fluorescence against the side scatter signal (SSC). The nuclei population was selected and a corresponding sorting gate defined in a histogram displaying the fluorescence intensity. Single haploid pollen nuclei were sorted into individual wells of a 96 well plate containing 2 µl distilled water using the “1.0 Drop Single” sort mode of the BD FACS Sortware (BD Biosciences).

Illumina NGS libraries were prepared from 96 single pollen nuclei using the PicoPLEX Gold Single Cell DNA-Seq kit (R300670, Takara Bio USA, Inc.) essentially as described before15. For amplification and addition of unique dual barcodes the libraries were denatured (95°C for 3 min), amplified for 4 cycles (95°C for 30 s, 63°C for 25 s, 68°C for 1 min) followed by 14 cycles (95°C for 30 s, 68°C for 1 min) and stored at 4°C. Pooling (2 µl aliquots of each individual library) and size-fractionation using a SYBR-Gold stained 2% agarose gel were as described (Dreissig et al., 2017). Here, a narrow size range of the pooled library (approximately 300 – 500 bp) appropriate for sequencing using a patterned flowcell was excised and purified (Dreissig et al., 2017). After the addition of 1.5% PhiX DNA as a control, the final pooled library was sequenced (SP flowcell, 2x 151 cycles paired-end, dual-indexing with 8 cycles per index) using the Illumina NovaSeq 6000 instrument according to protocols provided by the manufacturer (Illumina Inc.).

*Genetic map construction*

Primary data analysis including read mapping, SNP calling and filtration was done as described by Dreissig et al.15 with some modifications. Haplotypes 1 and 2 of FB19-011-3 were considered as parental genomes. Reads were aligned to haplotype 1 of that genotype. Simulated short reads were included in the analysis to determine the positions of segregating variants. Reads were simulated with wgsim. Genotype calls were aggregated in 200 kb bins. Binned genotypes were used for genetic map construction with ASMAP. We determined the phasing error rate as the proportion of SNP loci that do not support the assembly haplotype among all SNPs. We defined the main haplotypes in each pollen sample and determined whether there are genotype calls in the sample that do not match the majority haplotype. The majority haplotype depends on the genotype calls of all SNPs in a given sample and chromosome. An considered a SNP to be located in wrongly phased regions if fewer than 50% of samples supported the majority haplotype (**Extend Data Fig. 1c**).

*Autotetraploid genome assembly*

Primary unitig assembly and haplotype-wise pseudomolecule construction were done as for diploids. To assign a haplotype to one or more of the four possible haplotypes, we first constructed a Hi-C contact matrix considering only reads mapping within 2 Mb of contig borders. Only single-copy unitigs, i.e. those with an average coverage consistent with their presence in only a single haplotype, were considered. PCA was run on the Hi-C matrices in a chromosome-wise manner. Clusters were defined by the k-means method on PCs 1 and 2. The cumulative lengths of the defined clusters were inspected to decide if they were present in one or more haplotypes. K-means clusters composed of single-copy unitigs from multiple types were subjected to another round of PCA. Once four haplotypes were obtained, pairwise PCA including only unitigs from any group of two haplotypes was conducted. If no clear separation was evident, unitigs belonging to inseparable clusters and their Hi-C links were used as input and the clustering was repeated recursively until complete separation in pairwise PCAs (**Extended Data Fig. 5c**) was achieved. Multi-copy unitigs, i.e. those with coverage levels consistent with their presence in more than one haplotype, were assigned to haplotypes. For example, if a unitig had double coverage, we determined the two haplotypes that are closest in the PCA to that unitig among all four haplotype centers. Hi-C links and a majority rule were used to map smaller or other otherwise unphased unitigs to haplotypes. Multi-copy unitigs were included in the pseudomolecule construction of each haplotype they were assigned to.

*Chloroplast genome assembly*

HiFi reads of *H. bulbosum* genomes were aligned to the chloroplast genome of barley cv. Morex (GenBank accession EF115541) using minimap2 (version 2.24-r1122)16 with the parameters ”-ax map-hifi --secondary=no --sam-hit-only”. Alignments with quality below 30 were discarded. Aligned reads were converted to FASTQ format with SAMtools (version 1.16.1)17 and assembled with Canu (version 2.1.1)18 in the PacBio-HiFi mode with expected genome sizes ranging from 120 kb to 400 kb in 10 kb increments. All circular sequences were extracted from the assemblies and BEDTools (version 2.30.0)19 was used to identify the sequences’ circular starting points. Genes and other features on the circular sequences were annotated with GeSeq20. The assemblies with complete annotations were selected and aligned to the Morex chloroplast sequence with Mummer4 (version 4.0.0beta2)21. The starting positions and directions of the small single-copy (SSC) region match the Morex reference with seqkit (version 0.9.1)22. Multiple sequence alignment was done with MAFFT (version 7.490). A phylogenetic tree was constructed from the alignments with IQ-TREE (version 2.2.0-beta)23 using the parameters “-m MFP -bb 1000 -bnni -redo -o wheat”.

*Mitotic and male meiotic chromosome preparations*

Mitotic root-tip cells were prepared as described by Aliyeva-Schnorr et al.24 and male meiotic chromosomes were prepared according to Steckenborn et al.25 and either stained with Acetocarmine (Morphisto) for scoring chiasmata or used for FISH.

*Preparation of haplotype-specific oligo-FISH probes and* in situ *hybridization*

For the diploid *H. bulbosum* accession FB19-011-3, BBDuk (BBMap_37.93)26 was used to mask regions in the genome where 31-mers appear more than once. BEDtools (2.30.0)19 was utilized to identify the unmasked regions in the genome. All unmasked regions that were longer than 45 base pairs in length were selected as candidate regions for probe design were selected. For the tetraploid *H. bulbosum* accession FB19-028-3, we increased the *k*-mer size from 31 to 34 k-mers to increase the probe density. This higher *k*-mer size allows for identifying more distinct regions in the genome for probe design. Non-overlapping target-specific oligonucleotides were selected for the final probe sets and synthesized as myTAGs® Labeled Libraries (Daicel Arbor Bioscience, Ann Arbor, MI, USA). In the diploid probe, oligos were labelled with either Atto 594 (red) or Alexa 488 (green). In the tetraploid probe, oligos were labeled with Atto594 (red, haplotype 1), Alexa488 (green, haplotype 2), Atto 647N (far-red, haplotype 3) and digoxygenin (DIG, haplotype 4). The DIG-labeled oligos were detected by applying simultaneously anti-digoxygenin rhodamine (<https://www.sigmaaldrich.com/DE/de/product/roche/11207750910>) anti-digoxigenin-fluorescein (<https://www.sigmaaldrich.com/DE/de/product/roche/11207741910>). Chromosomes were counterstained with 4,6-diamidino-2-phenylindole (DAPI) in Vectashield antifade solution (Vector Laboratories). 5S (pCT4.2; ref. 27) and 45S (pTa71; ref. 28) rDNA, HvT01 (ref. 29) as well as *Arabidopsis*-type telomer FISH probes were labelled by nick translation with Texas Red and Atto488 (NT labelling kits, Jena Biosciences). FISH with repeat-specific probes and chromosome paiting probes was done according Steckenborn et al.25 and Kubalová et al. 30, repectively.

*Microscopy*

Widefield fluorescence images were captured using a microscope BX61 (Olympus Europa SE & Co. KG, Germany) equipped with an Orca ER CCD camera (Hamamatsu, Japan) or a Nikon Eclipse Ni-E fluorescence microscope equipped with a Nikon DS-Qi2 camera and NIS-Elements-AR version 4.60 software (Nikon, Tokyo, Japan). The final contrast of the images and pseudo colouring was processed using Adobe PHOTOSHOP software (Adobe, San Jose, CA, USA) or GIMP 2.10 (www.gimp.org).

*Population genetic analysis based on short-read data*

GBS data of 263 *H. bulbosum* plants (**Supplementary Table 10**) and 32 assembled haplotype sequences used. A total of 350 million simulated short reads were generated per haplotype with wgsim (version 1.14, <https://github.com/lh3/wgsim>). Reads were trimmed with cutadapt (version 1.15) and aligned to the haplotype 1 sequence assembly of FB19-011-3 with BWA-MEM31. Alignment records were converted to Binary/Alignment Map format with SAMtools17 and sorted with Novosort (<http://www.novocraft.com/products/novosort/>). BCFtools17 was used to call SNPs. The resultant VCF files were filtered with a custom AWK script ([https://bitbucket.org/ipk_dg_public/vcf_filtering](https://bitbucket.org/ipk_dg_public/vcf_filtering/src/master/)) using the options “--minmaf 0 --dphom 4 --dphet 8 --mindp 50 --minhomn 1 --minhomp 0.05 --tol 0.1 --minpresent 0.4 --minqual 40” and imported into R using seqArray32. Only SNPs were used in downstream analyses. PCAs were done with the snpgdsPCA() function of the package SNPrelate33 on SNPs with less than 20% missing data and a minor allele frequency ≥ 5%. A distance matrix was calculated with PLINK (v1.90b6.9)34 using the parameters '--distance 1-ibs flat-missing square' and transformed into a neighbor-joining tree with FASTME (version 2.1.5)35. ADMIXTURE (version 1.3.0)36 was run with k ranging from 1 to 9 on an LD-pruned SNP matrix with less than 10% missing data. LD pruning was done with PLINK using the option ‘-indep-pairwise 50 10 0.1’. The optimal number of populations (k = 4) was determined selecting the k with the lowest cross-validation error.

*Variant discovery in haplotype-resolved pangenome*

SNP, indels, and SVs were discovered in a panel of 33 sequence assemblies comprising the 32 assembled *H. bulbosum* haplotypes and the inbred genome of barley cv. Morex. Calling of SNP and indels was done with simulated short-read data using the FB19-011-3 haplotype 1 assembly as reference. For each haplotype/genome, 270 million pairs of 150 bp reads were simulated with wgsim. Read mapping and variant calling were done as described in the section “*Population genetic analysis based on short-read data*” for GBS reads and simulated WGS reads. SNPs and indels were filtered with the parameters “--minmaf 0 --mindp 30 --minhomn 1 --minhomp 0 --tol 0.5 --minpresent 0 --minqual 4”. A neighbor-joining tree was constructed as for the GBS data. To call “small” SVs in size range 40 kb to 20 kb, long-reads were simulated with splitfa (<https://github.com/ekg/splitfa>) using a windows size of 24 kb and a step size of 800 bp. The reads were aligned to FB19-011-3 haplotype 1 with Minimap2 using the parameters “-ax map-hifi --eqx –MD” and variants were called with Svim37. To call “large” (> 20 kb) SV, genome sequences were aligned to the common FB19-011-3 reference with wfmash (v0.8.2, <https://github.com/waveygang/wfmash>) with the parameters “-p 90 -l 0” and SVs were called with SyRI (version 1.6)38.

*Single-copy pangenome*

A single-copy pangenome was constructed as described by Jayakodi et al.39 (<https://bitbucket.org/ipk_dg_public/barley_pangenome/>) with one modification. MMSeq240 was used with the option “ --cluster-mode ” instead of BLAST for all-versus-all alignment. A minimum sequence identity of 95% was required to accept matches. To estimate pan-genome the lengths of the largest sequences in each cluster were summed up.

*Annotation and analysis of transposable elements*

Structurally intact and fragmented TEs in each genome were annotated using the Extensive de-novo TE Annotator (EDTA, v1.9.0)41. TREP42 (<https://trep-db.uzh.ch/>) was used as a curated library in addition to the manual selection of TE categories according to the classification from EDTA <https://github.com/oushujun/EDTA/blob/master/util/TE_Sequence_Ontology.txt>. The Barley MorexV3 high-confidence gene models8 were provided with the “--cds” option to exclude genic sequences from the TE annotation. The length, classification, insertion time and divergence information of each intact LTR retrotransposons was determined from the TE annotation output files of each genome (“intact.gff3” and “pass.list”). TEsorter43 was used to identify individual domains in BARE-1 families. Alignments of full domain of LTR retrotranspons were generated with TEsorter’s concatenate_domains.py script. Approximately maximum-likelihood phylogenetic trees were computed from these alignments with FastTree (version 2.1.11)44. Trees were visualized with iTOL45.

*Denovo gene annotation*

Structural gene annotation of the FB19-011-3 assembly was conducted by integrating *ab initio* gene calling and homology-based approaches with RNAseq, IsoSeq, and protein datasets. Expression data were mapped using STAR (version 2.7.8a)46 and assembled into transcripts with StringTie (version 2.1.5, parameters -m 150-t -f 0.3)47. Triticeae reference protein sequences (UniProt, https://www.uniprot.org, 05/10/2016) were aligned using GenomeThreader48 (version 1.7.1; arguments -startcodon -finalstopcodon -species rice -gcmincoverage 70 -prseedlength 7 -prhdist 4), IsoSeq datasets with GMAP (version 2018-07-04)49. Assembled transcripts and aligned protein sequences were combined using Cuffcompare (version 2.2.1)50 and merged with StringTie (version 2.1.5, parameters --merge -m150). TransDecoder (version 5.5.0; http://transdecoder.github.io) identified open reading frames and predicted protein sequences.

*Ab initio* annotation used Augustus (version 3.3.3)51, with GeneMark (version 4.35)52 to enhance it. To avoid potential over-prediction, guiding hints were generated from RNAseq, protein, IsoSeq datasets and transposable element annotation as described by Hoff and Stanke51. A *H. bulbosum*-specific prediction model was built by generating a set of gene models with full support from RNAseq and IsoSeq and Augustus was trained and optimized using the steps detailed by Hoff and Stanke51. All annotations were joined using EVidenceModeller53 (version 1.1.1) with adjusted weights: ab initio (Augustus: 5, GeneMark: 2), homology-based (10). Two rounds of PASA (version 2.4.1)54 identified untranslated regions and isoforms. Gene models were classified as high or low confidence based on BLASTP coverage against reference database hits (Uniprot Magnoliophyta, reviewed/Swissprot, downloaded on 3 Aug 2016; https://www.uniprot.org; PTREP (Release 19; http://botserv2.uzh.ch/kelldata/trep-db/index.html)).

Best hits were selected for each predicted protein from each of the three databases. Only hits with an e-value below 10e–10 were considered. This differentiated candidates into complete and valid genes, non-coding transcripts, pseudogenes, and transposable elements. Furthermore, functional annotation of all predicted protein sequences was done using the AHRD pipeline (https://github.com/groupschoof/AHRD). Hits with subject coverage (for protein references) or query coverage (transposon database) above 80% were considered significant and protein sequences were classified as high-confidence using the following criteria: protein sequence was complete and had a subject and query coverage above the threshold in the UniMag database or no BLAST hit in UniMag but in UniPoa and not PTREP; a low-confidence protein sequence was incomplete and had a hit in the UniMag or UniPoa database but not in PTREP. Alternatively, it had no hit in UniMag, UniPoa, or PTREP, but the protein sequence was complete. In a second refinement step, low-confidence proteins with an AHRD-score of 3* were promoted to high-confidence.

Gene projection

Gene models on assemblies other than that of FB19-011-3 (**Supplementary Table 7)** were annotated by gene projections similar to the approach described in Jayakodi et al.39 Input gene models for the projection were 80,708 high confidence genes of *H. bulbosum* FB19-011-3. We complemented the evidence-based *H.* *bulbosum* gene prediction by a non-redundant gene set of 20 *H. vulgare* genotypes totaling 223,182 genes. The latter dataset has been described in Guo et al. (preprint at https://doi.org/10.21203/rs.3.rs-3787876/v1). All source models were aligned to the genome sequences using minimap2 (refs. 16,55) with options ‘-ax splice:hq’ and ‘-uf’. Each match was subsequently scored by a pairwise protein alignment to the source model that triggered the match. Alignments were performed using the blosum62 matrix and the Needleman-Wunsch implementation of Biopython v1.8 (ref. 56). Next to an absolute match score, we also defined for each match a relative score as the ratio of its score to the maximal possible score of its source model. The latter was determined for each source model by self-alignments as described above.

Pfam domain scans57 and the AHRD pipeline (https://github.com/groupschoof/AHRD) binned all source genes into four classes of decreasing qualities: genes with and without pfam domains (class I and II, respectively), plastid- (class III) and transposon-related (class IV) genes. Quality classes enabled to prioritize the projection steps described below and to minimize over-prediction of transposon-derived or -suspicious sources. Starting from an empty annotation list, the actual projection incrementally added matches at different rounds if there was no coding overlap with any of the previous annotated models. Insertion of new matches was based on their match score and progressed from highest to lowest at each round. Throughout the step-wise projection, we tracked which source models had already been integrated into the current annotation by their gene identifier. For each round, we selected candidate matches out of all matches that fulfilled specific quality criteria. These criteria included membership to one of the four quality classes I-IV, a complete or partial open reading frame, a minimal relative match score and the uniqueness of the source, namely whether the source identifier of the respective match has already been included in the annotation list. The entire projection comprised nine steps of decreasing stringency. Applied scripts and exact criteria of each step are detailed in a github repository (https://github.com/GeorgHaberer/gene_projection/tree/main/panhordeum).

*Genome size change rates*

The sequence assembly of FB19-011-3 haplotype 1 was aligned to the barley MorexV3 assembly8 with wfmash (<https://github.com/waveygang/wfmash>). Alignments were filtered to retain those with alignment quality surpassing the 98th percentile and alignment lengths exceeding the 95th percentile. A Generalized Additive Model (GAM) was employed using the R package mgcv58 to combine and smooth the filtered alignments (**Supplementary Figure 10**). The GAM model was utilized to infer the genome size of *H. bulbosum* in 1 Mb intervals of *H. vulgare* along the whole genome and quantify of variations in genome size between the two species.

*Inference of demographic history*

The Pairwise Sequentially Markovian Coalescent (PSMC) software59 was used to infer population size trajectories in *H. bulbosum*. We used a synonymous mutation rate per base per generation of 6.5 × 10⁻⁹ as per Gaut et al.60 and a generation time of two years. Simulated long reads were generated from the haplotype-resolved assemblies as described in the section “*Variant discovery in haplotype-resolved pangenome*”. Reads of different haplotypes were combined to reconstitute diploid genomes or create synthetic heterozygotes aligned to the common reference FB19-011-3 haplotype 1 with minimap2 (ref. 16). Synthetic heterozygotes were created for (i) autotetraploids (six pairwise combinations per genotype); and (ii) between haplotypes of different genotypes to estimate divergence times between populations by looking for increases of population sizes not seen between haplotypes of the same genotype as described in Li et al.59

*Haplotype analysis*

Haplotypes were defined based on the SNP matrix whose generation is described in the section “*Variant discovery in haplotype-resolved pangenome”.* Genetic distances based onidentity-by-state were computed in 5 Mb genomic windows of the FB19-011-3 reference Haplotypes were using IntroBlocker61. The distribution of pairwise distance revealed two major peaks (**Extended Data Fig. 9a**), one at 6,500 variants per Mb, and the other at 10,000 variants per Mb. A threshold of 8500 was used to differentiate between these two peaks and a genomic variant density of 1000 SNPs per Mb was used in the Bayesian smoothing process of IntroBlocker. Haplotypes were defined with IntroBlocker in a semi-supervised manner using the priority order Diploid 2 > Diploid 1 > Tetraploid 1 > Tetraploid 2. "Diploid 1" are diploid populations outside of Libya, "Diploid 2” are diploid populations within Libya, "Tetraploid 1” are the first-formed tetraploid populations, including regions those from Central Asia, and "Tetraploid 2” refers to the tetraploid populations from Greece. A CNV block was defined as the area where the normalized read depth is less than 0.65 or greater than 1.35. Those regions were excluded from the analysis. The divergence times (T), i.e. the mean genetic distance (D) by the formula was calculated using the T/g = D/2μ. Generation time (g) and mutation rate (μ) were set as in section “*Inference of demographic history”.*

*Analysis of introgression lines*

GBS data of introgression lines (IL) of Wendler et al.62 were aligned to a synthetic diploid genome combing barley MorexV3 and FB19-011-3 haplotype 1. Read alignment was done as described in the section “*Population genetic analysis based on short-read data”.* Average read depths were calculated in 1 Mb windows along the genome with SAMtools. Windows of the *H. bulbosum* haplotype with more than 200 mapped reads were considered as introgressed regions (**Supplementary Figure 11**). The analysis repeated with each of the A17 haplotypes as possible *H. bulbosum* donors. IBS distances were calculated in the introgressed regions with PLINK to find the closest haplotype(s).

*NLR gene annotation and deleterious variants*

Complete NLR genes in the sequence assemblies of 32 *H. bulbosum* haplotypes and 76 *H.* vulgare genomes with NLR annotator63. To predict deleterious variants, SNP matrix of the 32 *H. bulbosum* haplotypes mapped against the barley genome was constructed from simulated short-read alignments as described in the section “*Variant discovery in haplotype-resolved pangenome”* replacing FB19-011-3 haplotype 1 with MorexV3 as the reference.Amino acid substitutions and their effects on protein function were predicted with SIFT64.A substitution was considered deleterious if its score was ≤ 0.05 and tolerated if the score was > 0.05. Variants that occurred in heterozygosity at least once in one sample were considered deleterious.

*Analysis of the ryd4 locus*

The JKI-5215 line was used to identify the A17-derived *Ryd4Hb* interval. It is derived from a BC2F7 plant from the population described by Scholz et al.65. *Ryd4Hb* flanking markers66 were aligned with BLAST+67 against the assemblies of the pangenomes and the resulting loci were extracted with SAMtools17 faidx. The NLRs in those intervals were annotated with NLR-annotator63 and non-NLR genes in the interval in barley cv. ‘Morex’ were aligned to identify their homologs. Intervals were compared using LASTZ alignments68 plotted as dotplots in R69. Genes and protein similarities were obtained through MUSCLE alignements70. The *Triticum monococcum* genome71 was downloaded from Graingenes72 (<https://avena.pw.usda.gov/genomes/mono/pan_home.php>). The microsynteny comparison between the *Sr35* interval and the *Ryd4Hb* interval was done with NGenomeSyn73 and minimap2 (ref. 55). The *Ryd4Hb* interval in the *H. vulgare* cultivar ‘Igri’ was aligned to the sequence assembly of the *Sr35* interval published by Saintenac et al.74 and the *Ryd4Hb* interval in *H. bulbosum* A17 haplotype 4 with BLASTN67. We graphically represented the homology between annotated genes with more than 80% nucleotide identity in **Fig. 5e**.

*Data availability*

All the sequence data collected in this study have been deposited at the European Nucleotide Archive (ENA) under BioProjects PRJEB65276 (Genome assemblies, transcriptome Illumina data, GBS data) and PRJEB65918 (pollen nuclei single-cell sequencing data). Accession codes for individual genotypes are listed in supplementary tables: **Supplementary Table 1, 2 and 7** (pangenome assemblies and associated raw data), **Supplementary Table 6** (pollen single-nuclei sequencing data)**, Supplementary Table 11** (GBS). The assemblies and annotation are available for download from https://galaxy-web.ipk-gatersleben.de/libraries/folders/Fb701da857886499b.

*Code availability*

Genome assembly and data analysis: https://github.com/jia-wu-feng/Pan_Bulbosum

Gene projection: https://github.com/GeorgHaberer/gene_projection/tree/main/panhordeum

**Reference for the Online Methods**

1 Jakob, S. S., Meister, A. & Blattner, F. R. The Considerable Genome Size Variation of Hordeum Species (Poaceae) Is Linked to Phylogeny, Life Form, Ecology, and Speciation Rates. *Molecular Biology and Evolution* **21**, 860-869 (2004). <https://doi.org:10.1093/molbev/msh092>

2 Dvorak, J., McGuire, P. E. & Cassidy, B. Apparent sources of the A genomes of wheats inferred from polymorphism in abundance and restriction fragment length of repeated nucleotide sequences. *Genome* **30**, 680-689 (1988). <https://doi.org:10.1139/g88-115>

3 Himmelbach, A., Walde, I., Mascher, M. & Stein, N. Tethered Chromosome Conformation Capture Sequencing in Triticeae: A Valuable Tool for Genome Assembly. *Bio-protocol* **8**, e2955 (2018). <https://doi.org:10.21769/BioProtoc.2955>

4 Himmelbach, A. *et al.* Discovery of multi‐megabase polymorphic inversions by chromosome conformation capture sequencing in large‐genome plant species. *The Plant Journal* (2018).

5 Wendler, N. *et al.* Unlocking the secondary gene-pool of barley with next-generation sequencing. *Plant Biotechnol J* **12**, 1122-1131 (2014). <https://doi.org:10.1111/pbi.12219>

6 Cheng, H., Concepcion, G. T., Feng, X., Zhang, H. & Li, H. Haplotype-resolved de novo assembly using phased assembly graphs with hifiasm. *Nature Methods* **18**, 170-175 (2021). <https://doi.org:10.1038/s41592-020-01056-5>

7 Marone, M. P., Singh, H. C., Pozniak, C. J. & Mascher, M. A technical guide to TRITEX, a computational pipeline for chromosome-scale sequence assembly of plant genomes. *Plant Methods* **18**, 128 (2022). <https://doi.org:10.1186/s13007-022-00964-1>

8 Mascher, M. *et al.* Long-read sequence assembly: a technical evaluation in barley. *Plant Cell* **33**, 1888-1906 (2021). <https://doi.org:10.1093/plcell/koab077>

9 Wu, T. D. & Watanabe, C. K. GMAP: a genomic mapping and alignment program for mRNA and EST sequences. *Bioinformatics* **21**, 1859-1875 (2005). <https://doi.org:10.1093/bioinformatics/bti310>

10 Mascher, M. *et al.* A chromosome conformation capture ordered sequence of the barley genome. *Nature* **544**, 427-433 (2017). <https://doi.org:10.1038/nature22043>

11 Monat, C. *et al.* TRITEX: chromosome-scale sequence assembly of Triticeae genomes with open-source tools. *Genome Biol* **20**, 284 (2019). <https://doi.org:10.1186/s13059-019-1899-5>

12 Šimková, H., Tulpová, Z. & Cápal, P. in *Plant Cytogenetics and Cytogenomics: Methods and Protocols* (eds Tony Heitkam & Sònia Garcia) 465-483 (Springer US, 2023).

13 Kron, P. & Husband, B. C. Using flow cytometry to estimate pollen DNA content: improved methodology and applications. *Ann Bot* **110**, 1067-1078 (2012). <https://doi.org:10.1093/aob/mcs167>

14 Galbraith, D. W. *et al.* Rapid flow cytometric analysis of the cell cycle in intact plant tissues. *Science* **220**, 1049-1051 (1983). <https://doi.org:10.1126/science.220.4601.1049>

15 Dreissig, S., Fuchs, J., Himmelbach, A., Mascher, M. & Houben, A. Sequencing of Single Pollen Nuclei Reveals Meiotic Recombination Events at Megabase Resolution and Circumvents Segregation Distortion Caused by Postmeiotic Processes. *Frontiers in Plant Science* **8** (2017). <https://doi.org:10.3389/fpls.2017.01620>

16 Li, H. Minimap2: pairwise alignment for nucleotide sequences. *Bioinformatics* **1**, 7 (2018).

17 Danecek, P. *et al.* Twelve years of SAMtools and BCFtools. *GigaScience* **10** (2021). <https://doi.org:10.1093/gigascience/giab008>

18 Nurk, S. *et al.* HiCanu: accurate assembly of segmental duplications, satellites, and allelic variants from high-fidelity long reads. *Genome Research* **30**, 1291–1305 (2020). <https://doi.org:10.1101/gr.263566.120>

19 Quinlan, A. R. & Hall, I. M. BEDTools: a flexible suite of utilities for comparing genomic features. *Bioinformatics* **26**, 841-842 (2010). <https://doi.org:10.1093/bioinformatics/btq033>

20 Tillich, M. *et al.* GeSeq – versatile and accurate annotation of organelle genomes. *Nucleic Acids Research* **45**, W6-W11 (2017). <https://doi.org:10.1093/nar/gkx391>

21 Marçais, G. *et al.* MUMmer4: A fast and versatile genome alignment system. *PLoS Comput Biol* **14**, e1005944 (2018). <https://doi.org:10.1371/journal.pcbi.1005944>

22 Shen, W., Le, S., Li, Y. & Hu, F. SeqKit: A Cross-Platform and Ultrafast Toolkit for FASTA/Q File Manipulation. *PLoS One* **11**, e0163962 (2016). <https://doi.org:10.1371/journal.pone.0163962>

23 Minh, B. Q. *et al.* IQ-TREE 2: New Models and Efficient Methods for Phylogenetic Inference in the Genomic Era. *Mol Biol Evol* **37**, 1530-1534 (2020). <https://doi.org:10.1093/molbev/msaa015>

24 Aliyeva-Schnorr, L. *et al.* Cytogenetic mapping with centromeric bacterial artificial chromosomes contigs shows that this recombination-poor region comprises more than half of barley chromosome 3H. *The Plant Journal* **84**, 385-394 (2015). <https://doi.org:https://doi.org/10.1111/tpj.13006>

25 Steckenborn, S. *et al.* The meiotic topoisomerase VI B subunit (MTOPVIB) is essential for meiotic DNA double-strand break formation in barley (Hordeum vulgare L.). *Plant Reproduction* **36**, 1-15 (2023). <https://doi.org:10.1007/s00497-022-00444-5>

26 Bushnell, B.

27 Campell, B. R., Song, Y., Posch, T. E., Cullis, C. A. & Town, C. D. Sequence and organization of 5S ribosomal RNA-encoding genes of Arabidopsis thaliana. *Gene* **112**, 225-228 (1992). <https://doi.org:10.1016/0378-1119(92)90380-8>

28 Gerlach, W. L. & Bedbrook, J. R. Cloning and characterization of ribosomal RNA genes from wheat and barley. *Nucleic Acids Res* **7**, 1869-1885 (1979). <https://doi.org:10.1093/nar/7.7.1869>

29 Belostotsky, D. A. & Ananiev, E. V. Characterization of relic DNA from barley genome. *Theor Appl Genet* **80**, 374-380 (1990). <https://doi.org:10.1007/bf00210075>

30 Kubalova, I. *et al.* Helical coiling of metaphase chromatids. *Nucleic Acids Res* **51**, 2641-2654 (2023). <https://doi.org:10.1093/nar/gkad028>

31 Li, H. Aligning sequence reads, clone sequences and assembly contigs with BWA-MEM. *arXiv preprint arXiv:1303.3997* (2013).

32 Zheng, X. *et al.* SeqArray—a storage-efficient high-performance data format for WGS variant calls. *Bioinformatics* **33**, 2251-2257 (2017). <https://doi.org:10.1093/bioinformatics/btx145>

33 Zheng, X. *et al.* A high-performance computing toolset for relatedness and principal component analysis of SNP data. *Bioinformatics* **28**, 3326-3328 (2012). <https://doi.org:10.1093/bioinformatics/bts606>

34 Purcell, S. *et al.* PLINK: a tool set for whole-genome association and population-based linkage analyses. *Am J Hum Genet* **81**, 559-575 (2007). <https://doi.org:10.1086/519795>

35 Lefort, V., Desper, R. & Gascuel, O. FastME 2.0: A Comprehensive, Accurate, and Fast Distance-Based Phylogeny Inference Program. *Mol Biol Evol* **32**, 2798-2800 (2015). <https://doi.org:10.1093/molbev/msv150>

36 Alexander, D. H., Novembre, J. & Lange, K. Fast model-based estimation of ancestry in unrelated individuals. *Genome Research* **19**, 1655-1664 (2009). <https://doi.org:10.1101/gr.094052.109>

37 Heller, D. & Vingron, M. SVIM: structural variant identification using mapped long reads. *Bioinformatics* **35**, 2907-2915 (2019). <https://doi.org:10.1093/bioinformatics/btz041>

38 Goel, M., Sun, H., Jiao, W.-B. & Schneeberger, K. SyRI: finding genomic rearrangements and local sequence differences from whole-genome assemblies. *Genome Biology* **20**, 277 (2019). <https://doi.org:10.1186/s13059-019-1911-0>

39 Jayakodi, M. *et al.* The barley pan-genome reveals the hidden legacy of mutation breeding. *Nature* **588**, 284-289 (2020). <https://doi.org:10.1038/s41586-020-2947-8>

40 Steinegger, M. & Söding, J. MMseqs2 enables sensitive protein sequence searching for the analysis of massive data sets. *Nature Biotechnology* **35**, 1026-1028 (2017). <https://doi.org:10.1038/nbt.3988>

41 Ou, S. *et al.* Benchmarking transposable element annotation methods for creation of a streamlined, comprehensive pipeline. *Genome Biology* **20**, 275 (2019). <https://doi.org:10.1186/s13059-019-1905-y>

42 Wicker, T., Matthews, D. E. & Keller, B. TREP: a database for Triticeae repetitive elements. *Trends in Plant Science* **7**, 561-562 (2002). <https://doi.org:10.1016/S1360-1385(02)02372-5>

43 Zhang, R.-G. *et al.* TEsorter: An accurate and fast method to classify LTR-retrotransposons in plant genomes. *Horticulture Research* **9** (2022). <https://doi.org:10.1093/hr/uhac017>

44 Price, M. N., Dehal, P. S. & Arkin, A. P. FastTree 2--approximately maximum-likelihood trees for large alignments. *PLoS One* **5**, e9490 (2010). <https://doi.org:10.1371/journal.pone.0009490>

45 Letunic, I. & Bork, P. Interactive Tree Of Life (iTOL) v5: an online tool for phylogenetic tree display and annotation. *Nucleic Acids Research* **49**, W293-W296 (2021). <https://doi.org:10.1093/nar/gkab301>

46 Dobin, A. *et al.* STAR: ultrafast universal RNA-seq aligner. *Bioinformatics* **29**, 15-21 (2013). <https://doi.org:10.1093/bioinformatics/bts635>

47 Kovaka, S. *et al.* Transcriptome assembly from long-read RNA-seq alignments with StringTie2. *Genome Biology* **20**, 278 (2019). <https://doi.org:10.1186/s13059-019-1910-1>

48 Gremme, G., Brendel, V., Sparks, M. E. & Kurtz, S. Engineering a software tool for gene structure prediction in higher organisms. *Information and Software Technology* **47**, 965-978 (2005). <https://doi.org:https://doi.org/10.1016/j.infsof.2005.09.005>

49 Watanabe, M. E. The Nagoya Protocol: The Conundrum of Defining Digital Sequence Information. *BioScience* **69**, 480-480 (2019). <https://doi.org:10.1093/biosci/biz034>

50 Ghosh, S. & Chan, C. K. Analysis of RNA-Seq Data Using TopHat and Cufflinks. *Methods Mol Biol* **1374**, 339-361 (2016). <https://doi.org:10.1007/978-1-4939-3167-5_18>

51 Hoff, K. J. & Stanke, M. Predicting Genes in Single Genomes with AUGUSTUS. *Current Protocols in Bioinformatics* **65**, e57 (2019). <https://doi.org:10.1002/cpbi.57>

52 Ter-Hovhannisyan, V., Lomsadze, A., Chernoff, Y. O. & Borodovsky, M. Gene prediction in novel fungal genomes using an ab initio algorithm with unsupervised training. *Genome Res* **18**, 1979-1990 (2008). <https://doi.org:10.1101/gr.081612.108>

53 Haas, B. J. *et al.* Automated eukaryotic gene structure annotation using EVidenceModeler and the Program to Assemble Spliced Alignments. *Genome Biol* **9**, R7 (2008). <https://doi.org:10.1186/gb-2008-9-1-r7>

54 Haas, B. J. *et al.* Improving the Arabidopsis genome annotation using maximal transcript alignment assemblies. *Nucleic Acids Research* **31**, 5654-5666 (2003). <https://doi.org:10.1093/nar/gkg770>

55 Li, H. New strategies to improve minimap2 alignment accuracy. *Bioinformatics* **37**, 4572-4574 (2021). <https://doi.org:10.1093/bioinformatics/btab705>

56 Cock, P. J. *et al.* Biopython: freely available Python tools for computational molecular biology and bioinformatics. *Bioinformatics* **25**, 1422-1423 (2009). <https://doi.org:10.1093/bioinformatics/btp163>

57 Mistry, J. *et al.* Pfam: The protein families database in 2021. *Nucleic Acids Research* **49**, D412-D419 (2020). <https://doi.org:10.1093/nar/gkaa913>

58 Wood, S. N. Fast stable restricted maximum likelihood and marginal likelihood estimation of semiparametric generalized linear models. *Journal of the Royal Statistical Society: Series B (Statistical Methodology)* **73**, 3-36 (2011). <https://doi.org:https://doi.org/10.1111/j.1467-9868.2010.00749.x>

59 Li, H. & Durbin, R. Inference of human population history from individual whole-genome sequences. *Nature* **475**, 493-496 (2011). <https://doi.org:10.1038/nature10231>

60 Gaut, B. S., Morton, B. R., McCaig, B. C. & Clegg, M. T. Substitution rate comparisons between grasses and palms: synonymous rate differences at the nuclear gene Adh parallel rate differences at the plastid gene rbcL. *Proceedings of the National Academy of Sciences* **93**, 10274-10279 (1996).

61 Wang, Z. *et al.* Dispersed emergence and protracted domestication of polyploid wheat uncovered by mosaic ancestral haploblock inference. *Nature Communications* **13**, 3891 (2022). <https://doi.org:10.1038/s41467-022-31581-0>

62 Wendler, N. *et al.* Bulbosum to go: a toolbox to utilize Hordeum vulgare/bulbosum introgressions for breeding and beyond. *Molecular plant* **8**, 1507-1519 (2015).

63 Steuernagel, B. *et al.* The NLR-Annotator Tool Enables Annotation of the Intracellular Immune Receptor Repertoire1  [OPEN]. *Plant Physiology* **183**, 468-482 (2020). <https://doi.org:10.1104/pp.19.01273>

64 Vaser, R., Adusumalli, S., Leng, S. N., Sikic, M. & Ng, P. C. SIFT missense predictions for genomes. *Nature Protocols* **11**, 1-9 (2016). <https://doi.org:10.1038/nprot.2015.123>

65 Scholz, M. *et al.* Ryd4Hb: a novel resistance gene introgressed from Hordeumbulbosum into barley and conferring complete and dominant resistance to the barley yellow dwarf virus. *Theoretical and Applied Genetics* **119**, 837-849 (2009). <https://doi.org:10.1007/s00122-009-1093-3>

66 Hélène, P. *et al.* High-resolution mapping of &lt;em&gt;Ryd4&lt;sup&gt;Hb&lt;/sup&gt;&lt;/em&gt;, a major resistance gene to &lt;em&gt;Barley yellow dwarf virus&lt;/em&gt; from &lt;em&gt;Hordeum bulbosum&lt;/em&gt. *bioRxiv*, 2023.2009.2019.558385 (2023). <https://doi.org:10.1101/2023.09.19.558385>

67 Camacho, C. *et al.* BLAST+: architecture and applications. *BMC Bioinformatics* **10**, 421 (2009). <https://doi.org:10.1186/1471-2105-10-421>

68 Harris, R. S. *Improved pairwise alignment of genomic DNA*. (The Pennsylvania State University, 2007).

69 R Core Team. R: A language and environment for statistical computing. R Foundation for Statistical Computing, Vienna, Austria. 2022. (2022).

70 Edgar, R. C. Muscle5: High-accuracy alignment ensembles enable unbiased assessments of sequence homology and phylogeny. *Nature Communications* **13**, 6968 (2022). <https://doi.org:10.1038/s41467-022-34630-w>

71 Ahmed, H. I. *et al.* Einkorn genomics sheds light on history of the oldest domesticated wheat. *Nature* **620**, 830-838 (2023). <https://doi.org:10.1038/s41586-023-06389-7>

72 Yao, E. *et al.* GrainGenes: a data-rich repository for small grains genetics and genomics. *Database* **2022** (2022). <https://doi.org:10.1093/database/baac034>

73 He, W. *et al.* NGenomeSyn: an easy-to-use and flexible tool for publication-ready visualization of syntenic relationships across multiple genomes. *Bioinformatics* **39** (2023). <https://doi.org:10.1093/bioinformatics/btad121>

74 Saintenac, C. *et al.* Identification of wheat gene Sr35 that confers resistance to Ug99 stem rust race group. *Science* **341**, 783-786 (2013). <https://doi.org:10.1126/science.1239022>
