# Supplementary material for: A haplotype-resolved pangenome of the barley wild relative Hordeum bulbosum
Source: Research Square preprint supplement (doi:10.21203/rs.3.rs-3916840/v1), 2024-02-08
Supplement: Supplementary file 4 [file 36d15907fa0ba885d69fa79a.docx]

**Supplementary Figure 1: K-mer analysis of 4 diploids and 6 tetraploid genomes with 71-mers.**


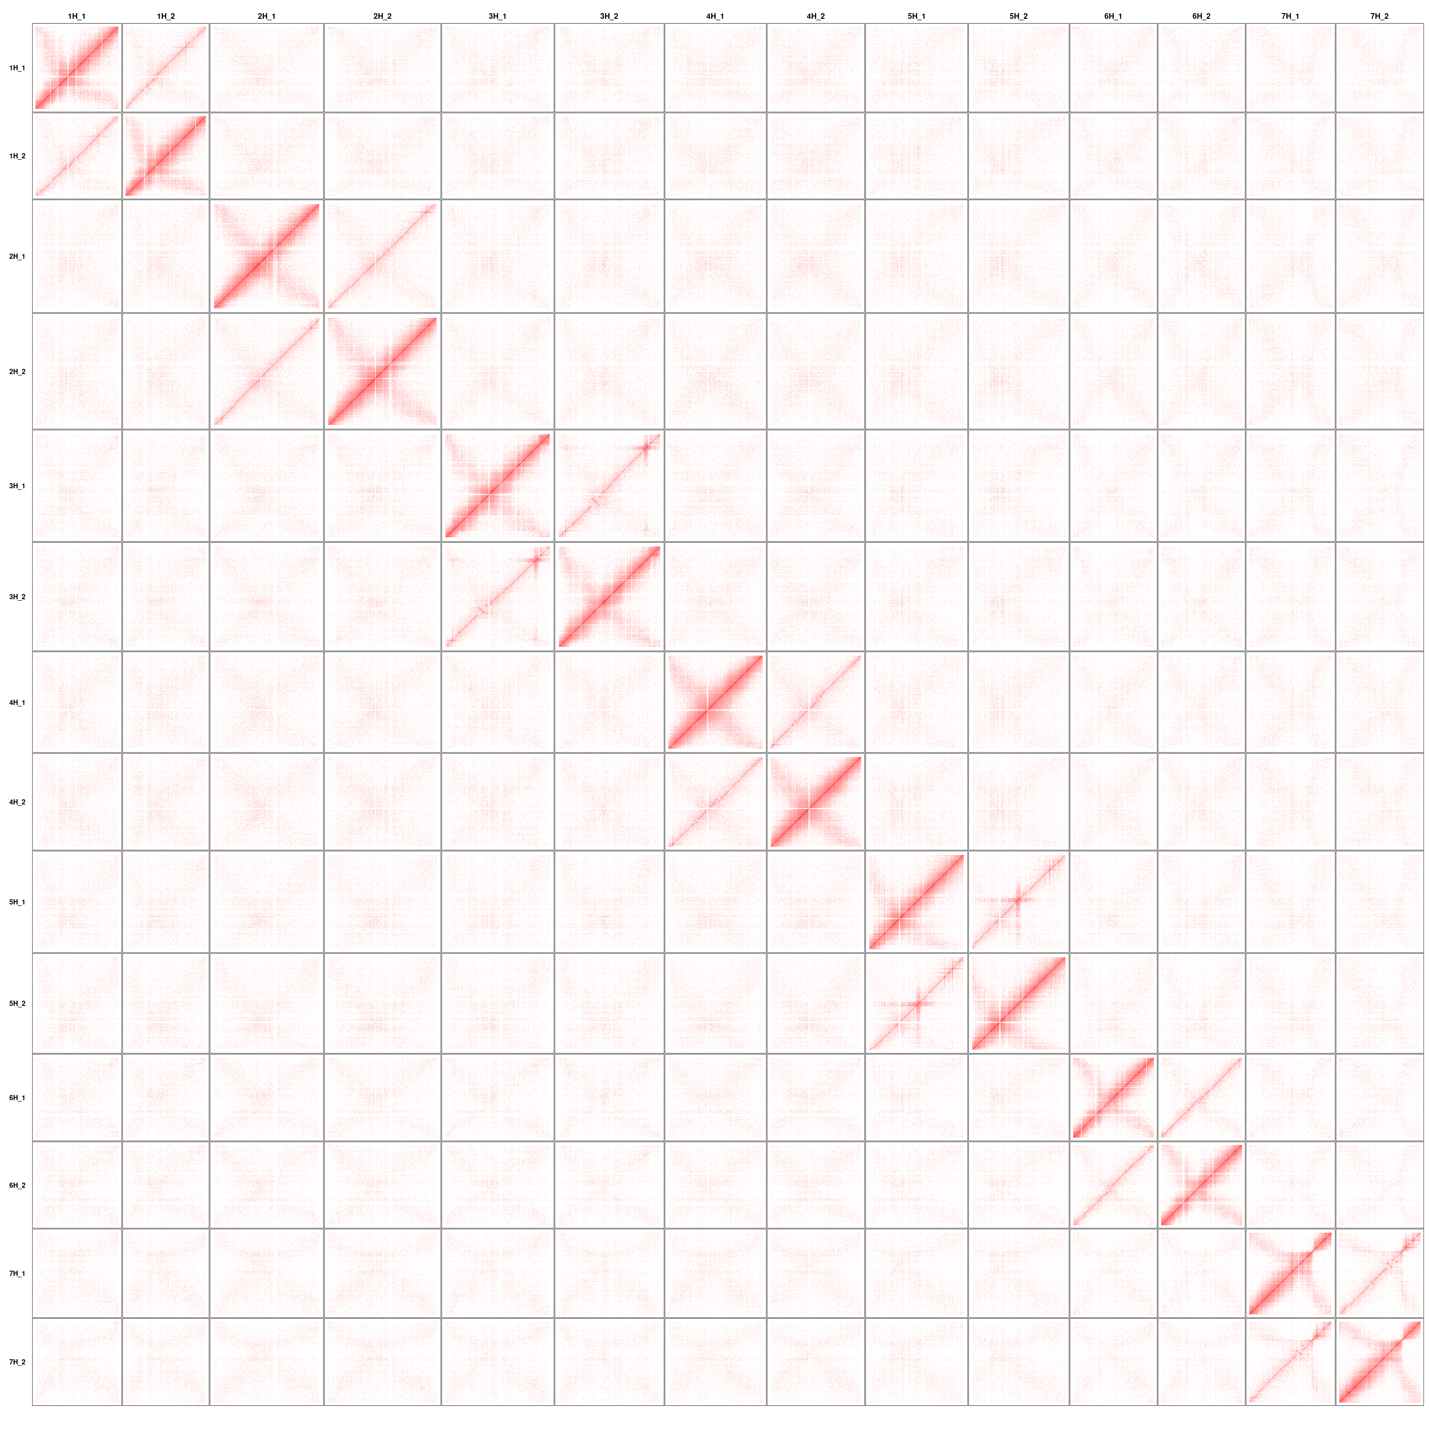


**Supplementary Figure 2: FB20-005-1 Hi-C contact matrix.** The intensity of pixels represents the normalized count of Hi-C links between 1 Mb windows on all chromosomes and haplotypes.


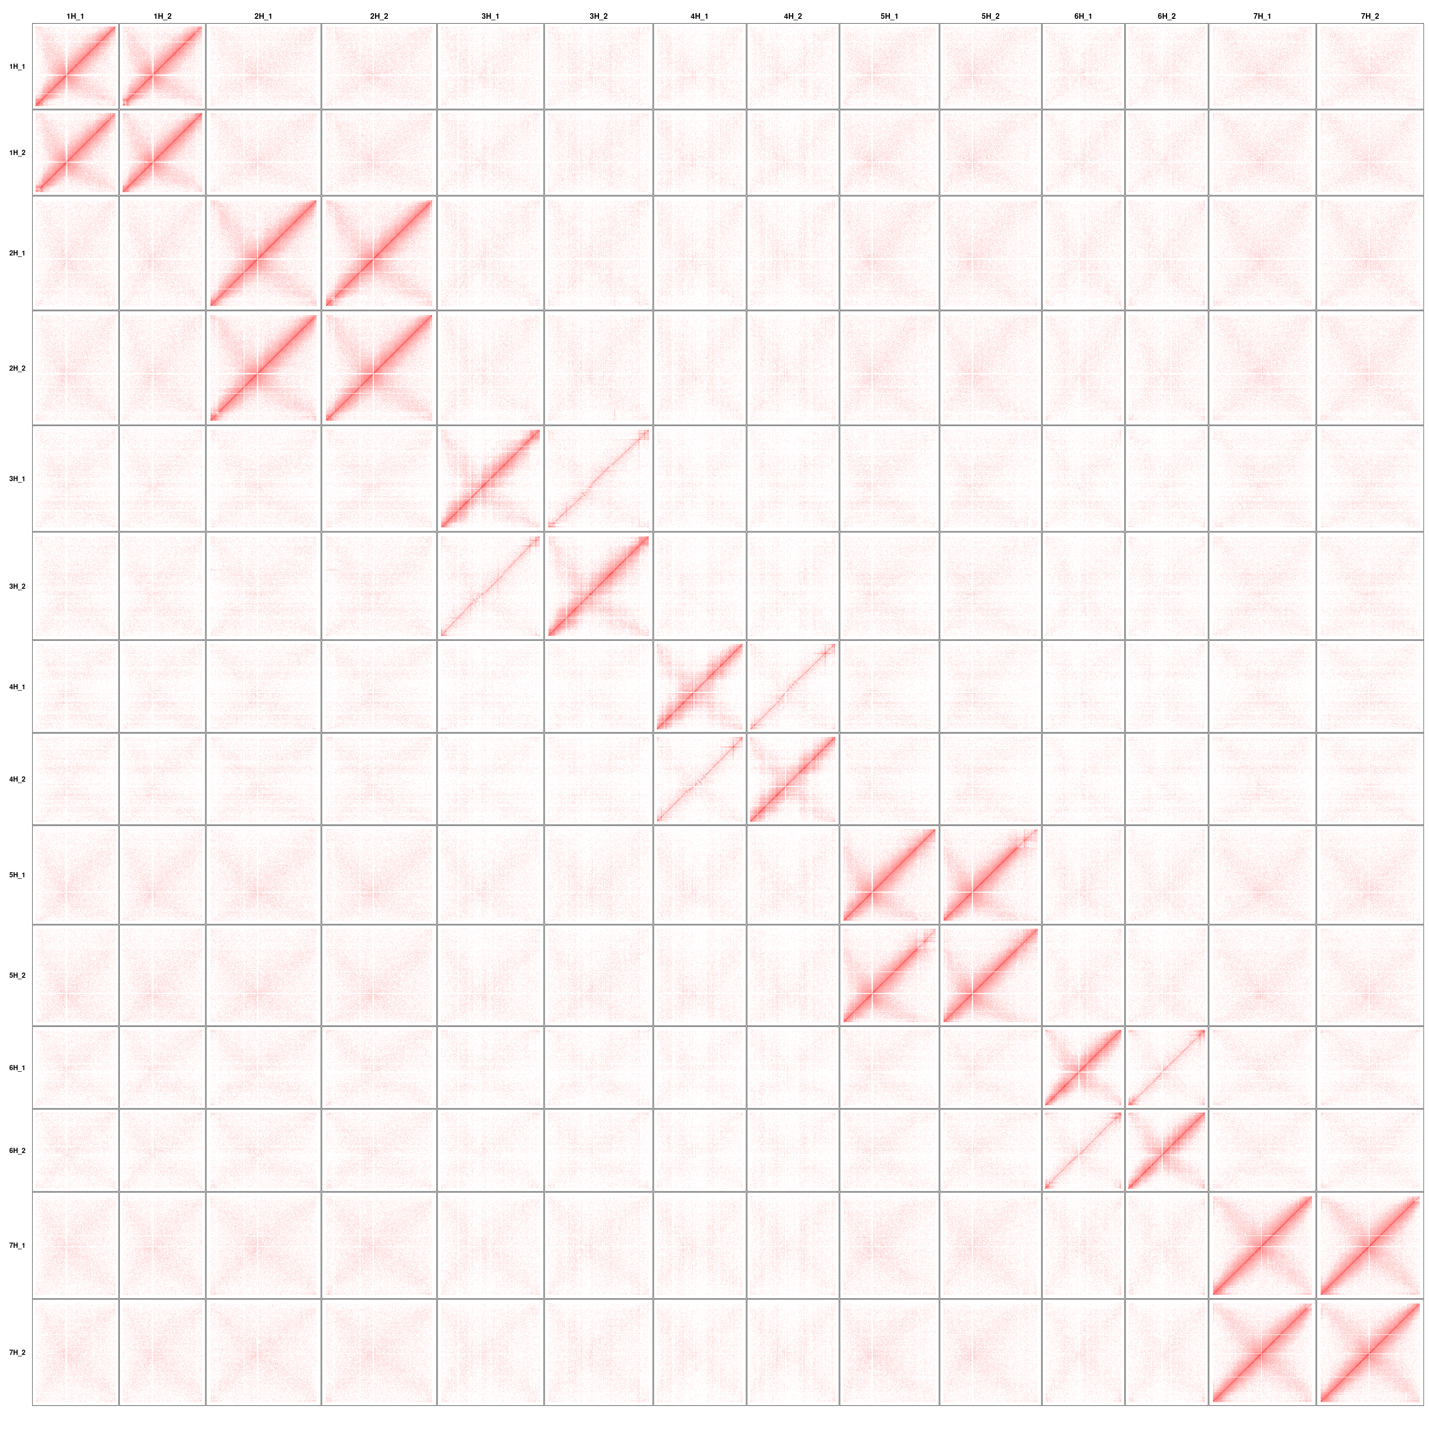


**Supplementary Figure 3: FB20-029-7 Hi-C contact matrix.**


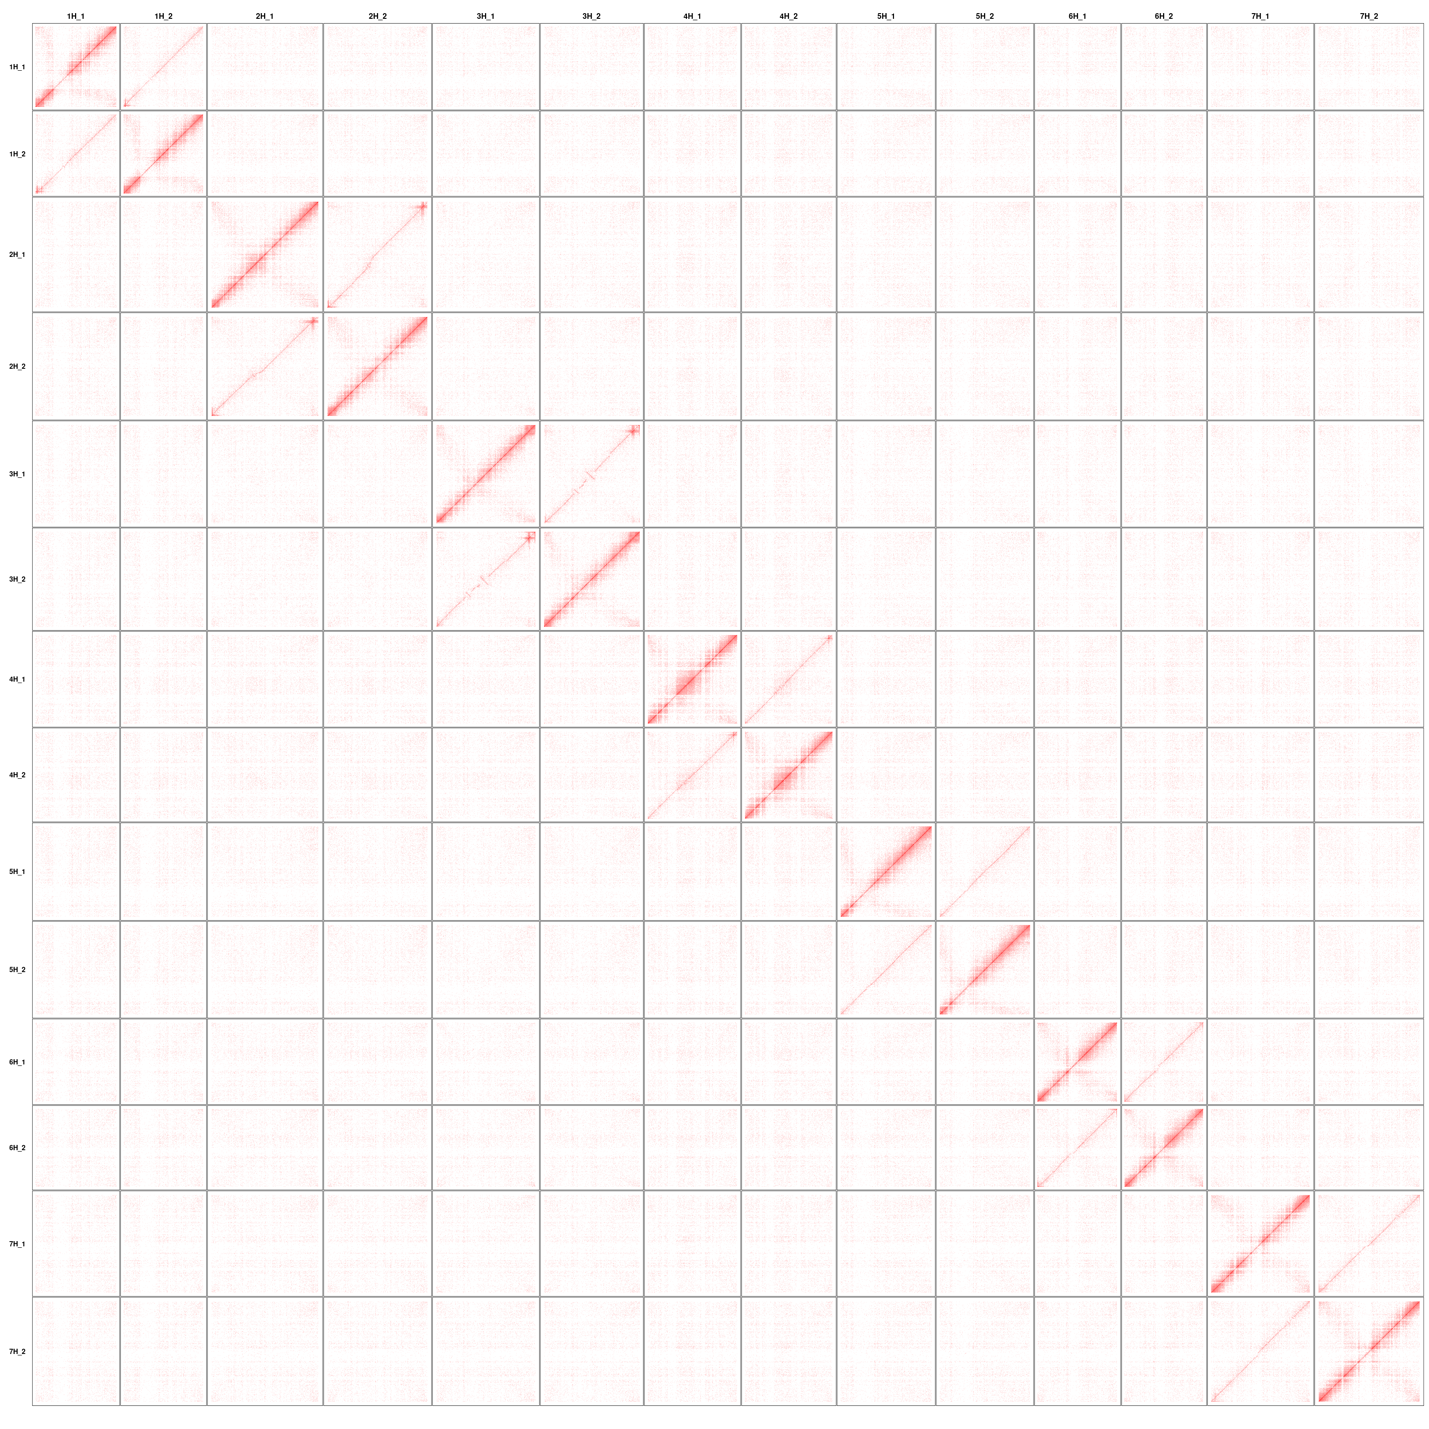


**Supplementary Figure 4: PI365428 Hi-C contact matrix.**


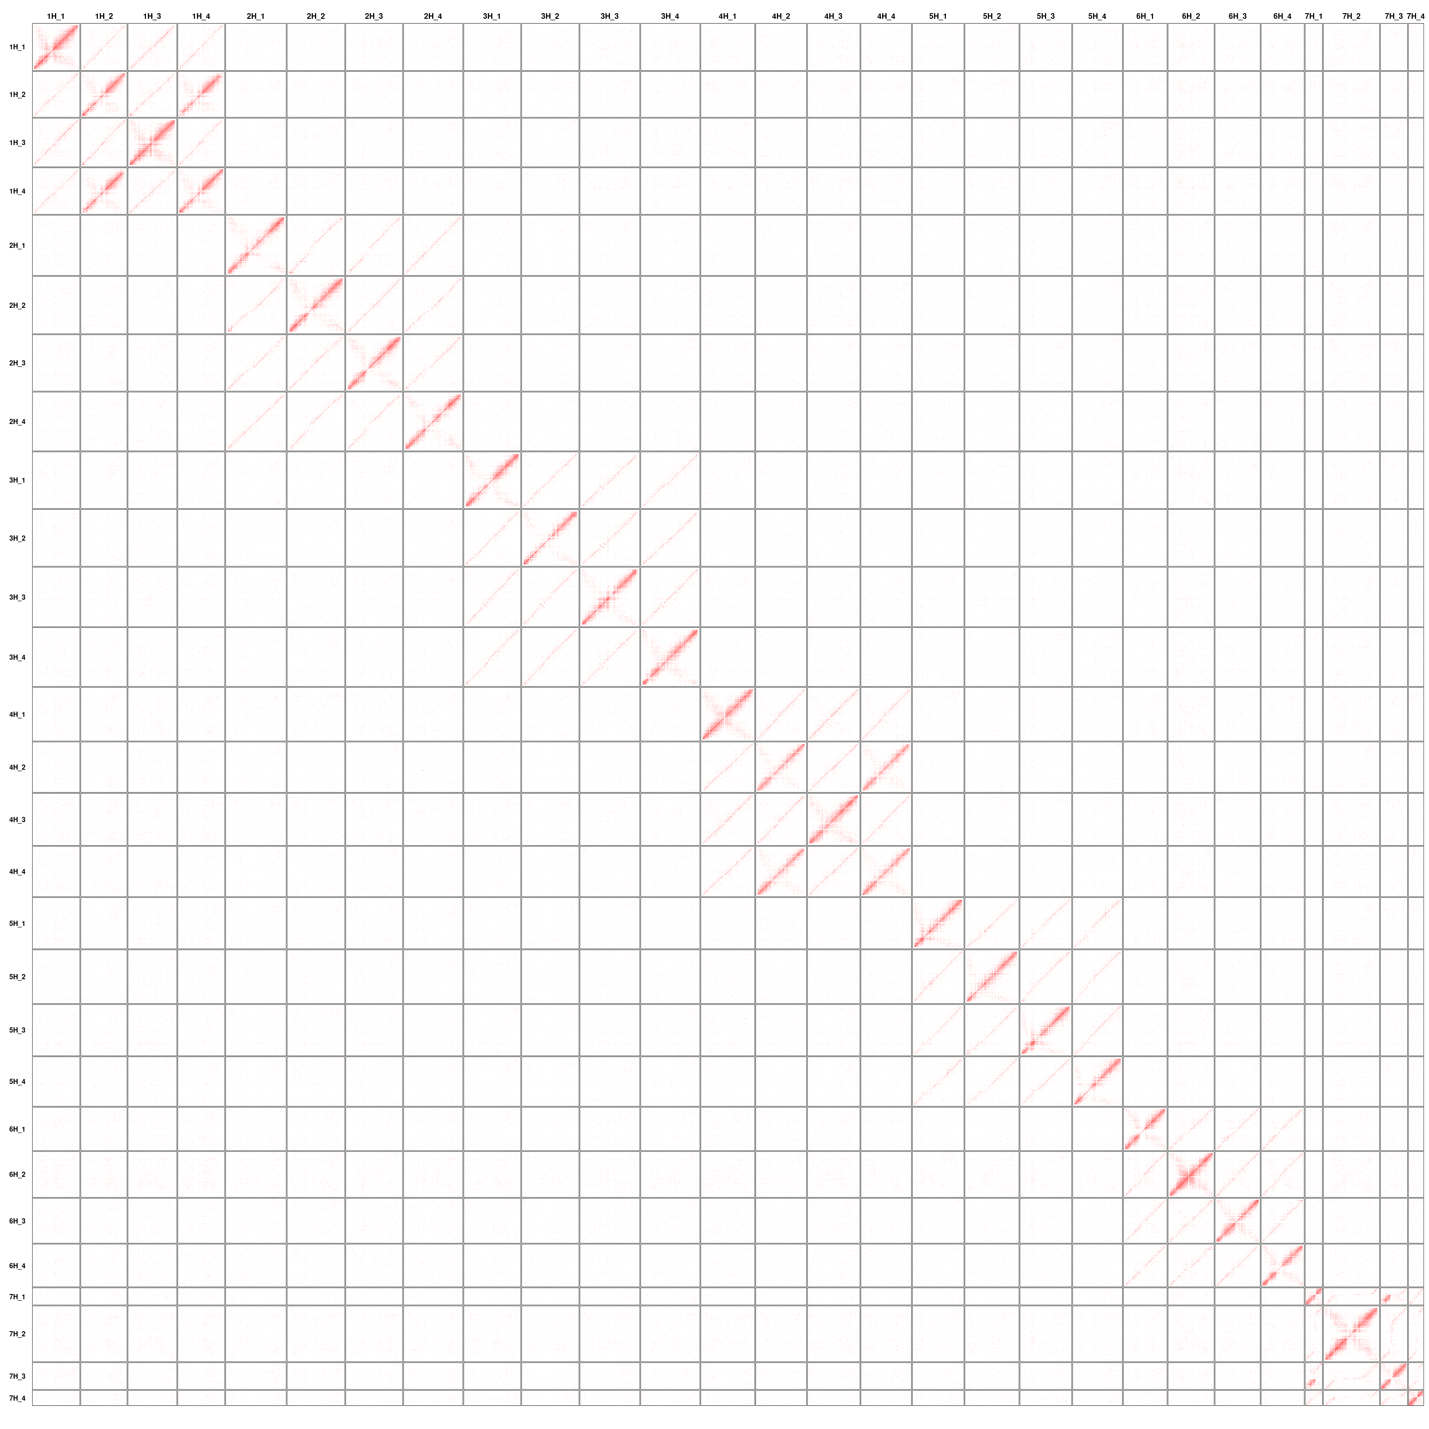


**Supplementary Figure 5: FB19-001-1 Hi-C contact matrix.**


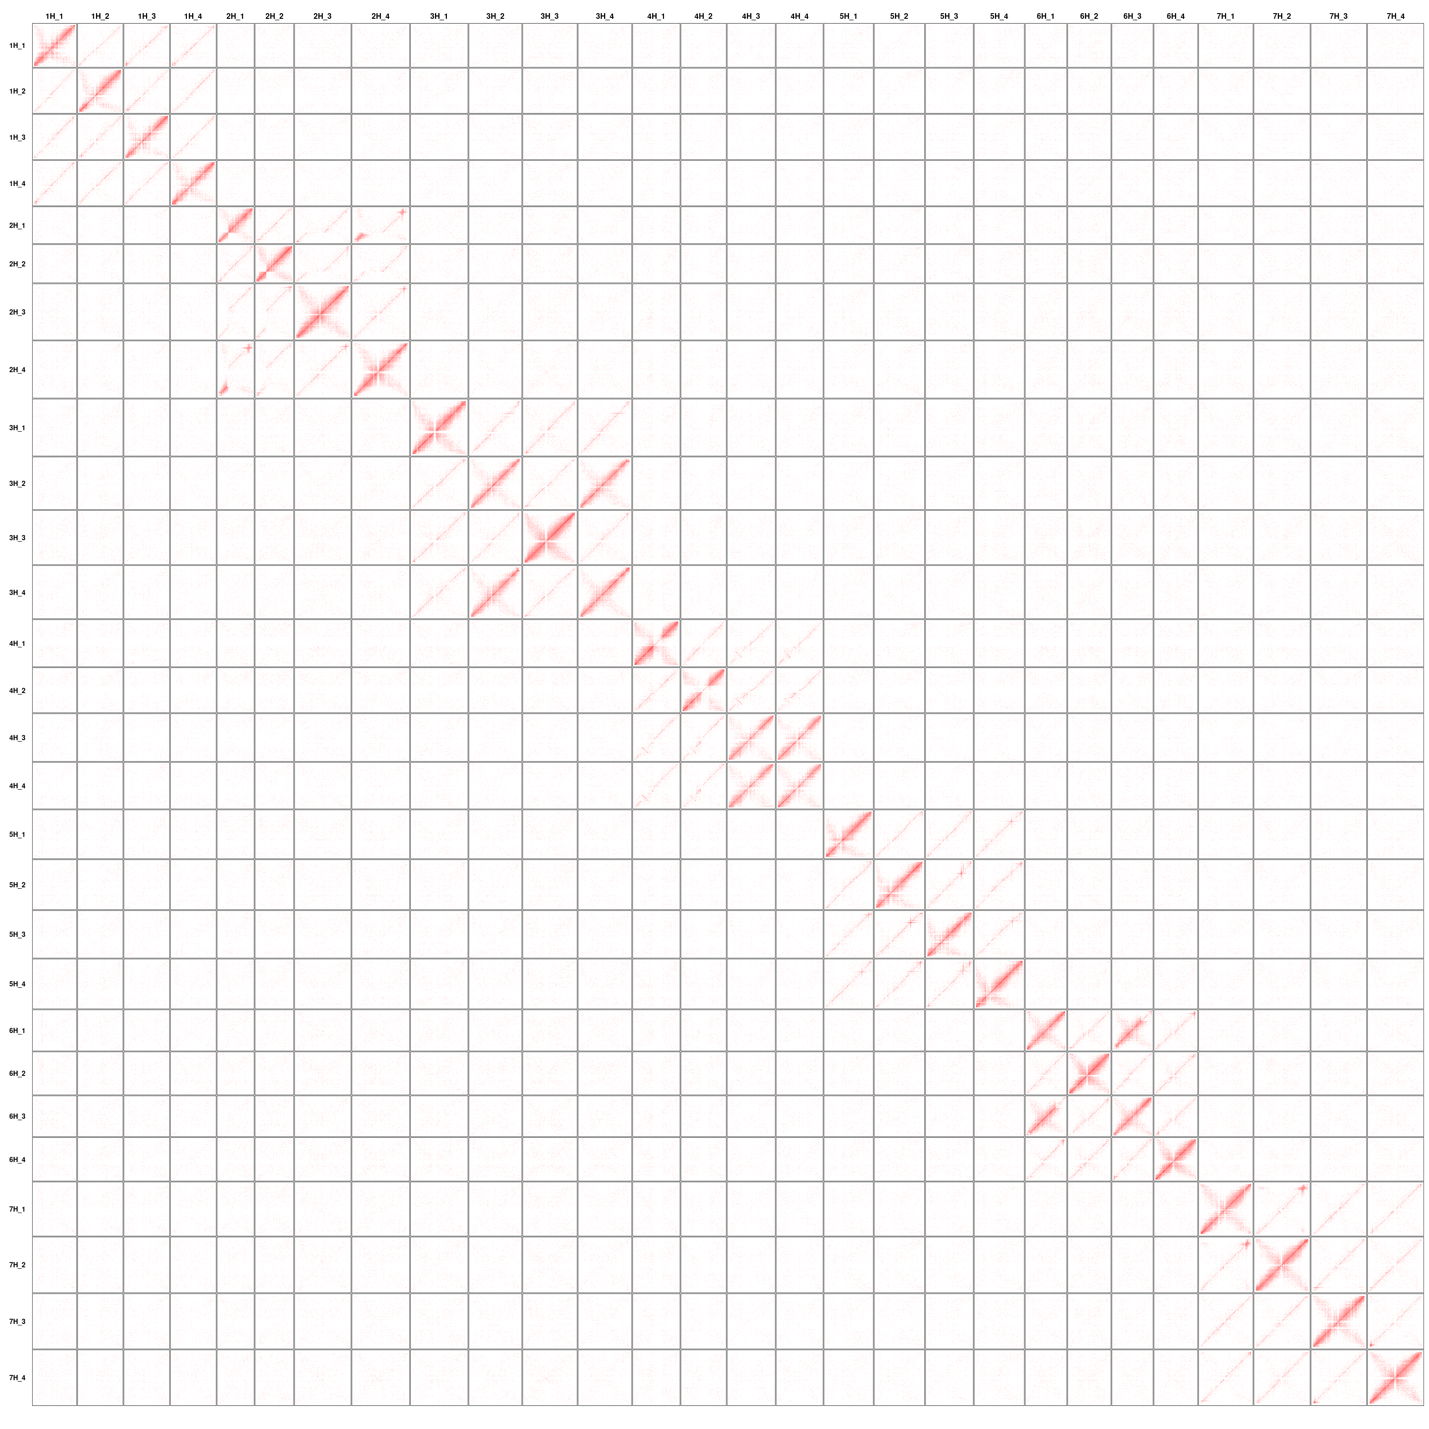


**Supplementary Figure 6: GRA2256-1 Hi-C contact matrix.**


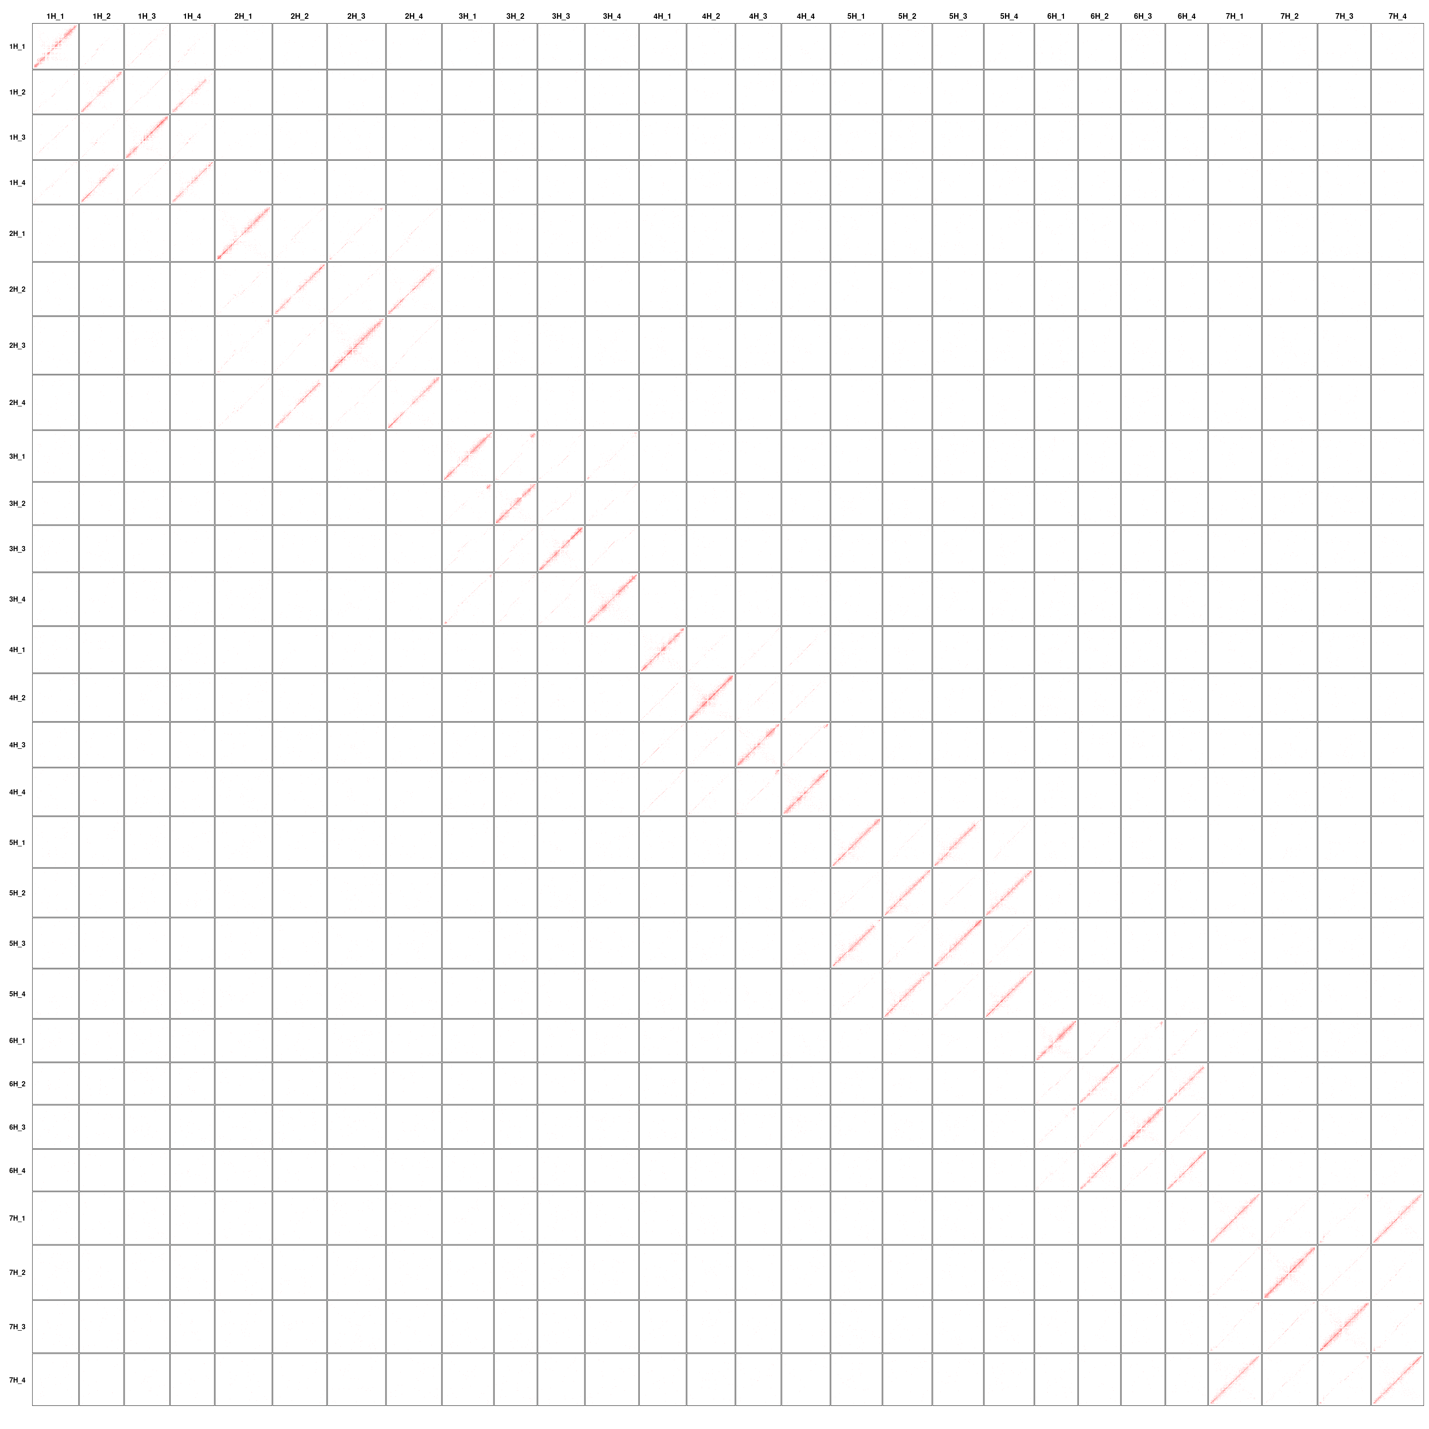


**Supplementary Figure 7: A17 Hi-C contact matrix.**


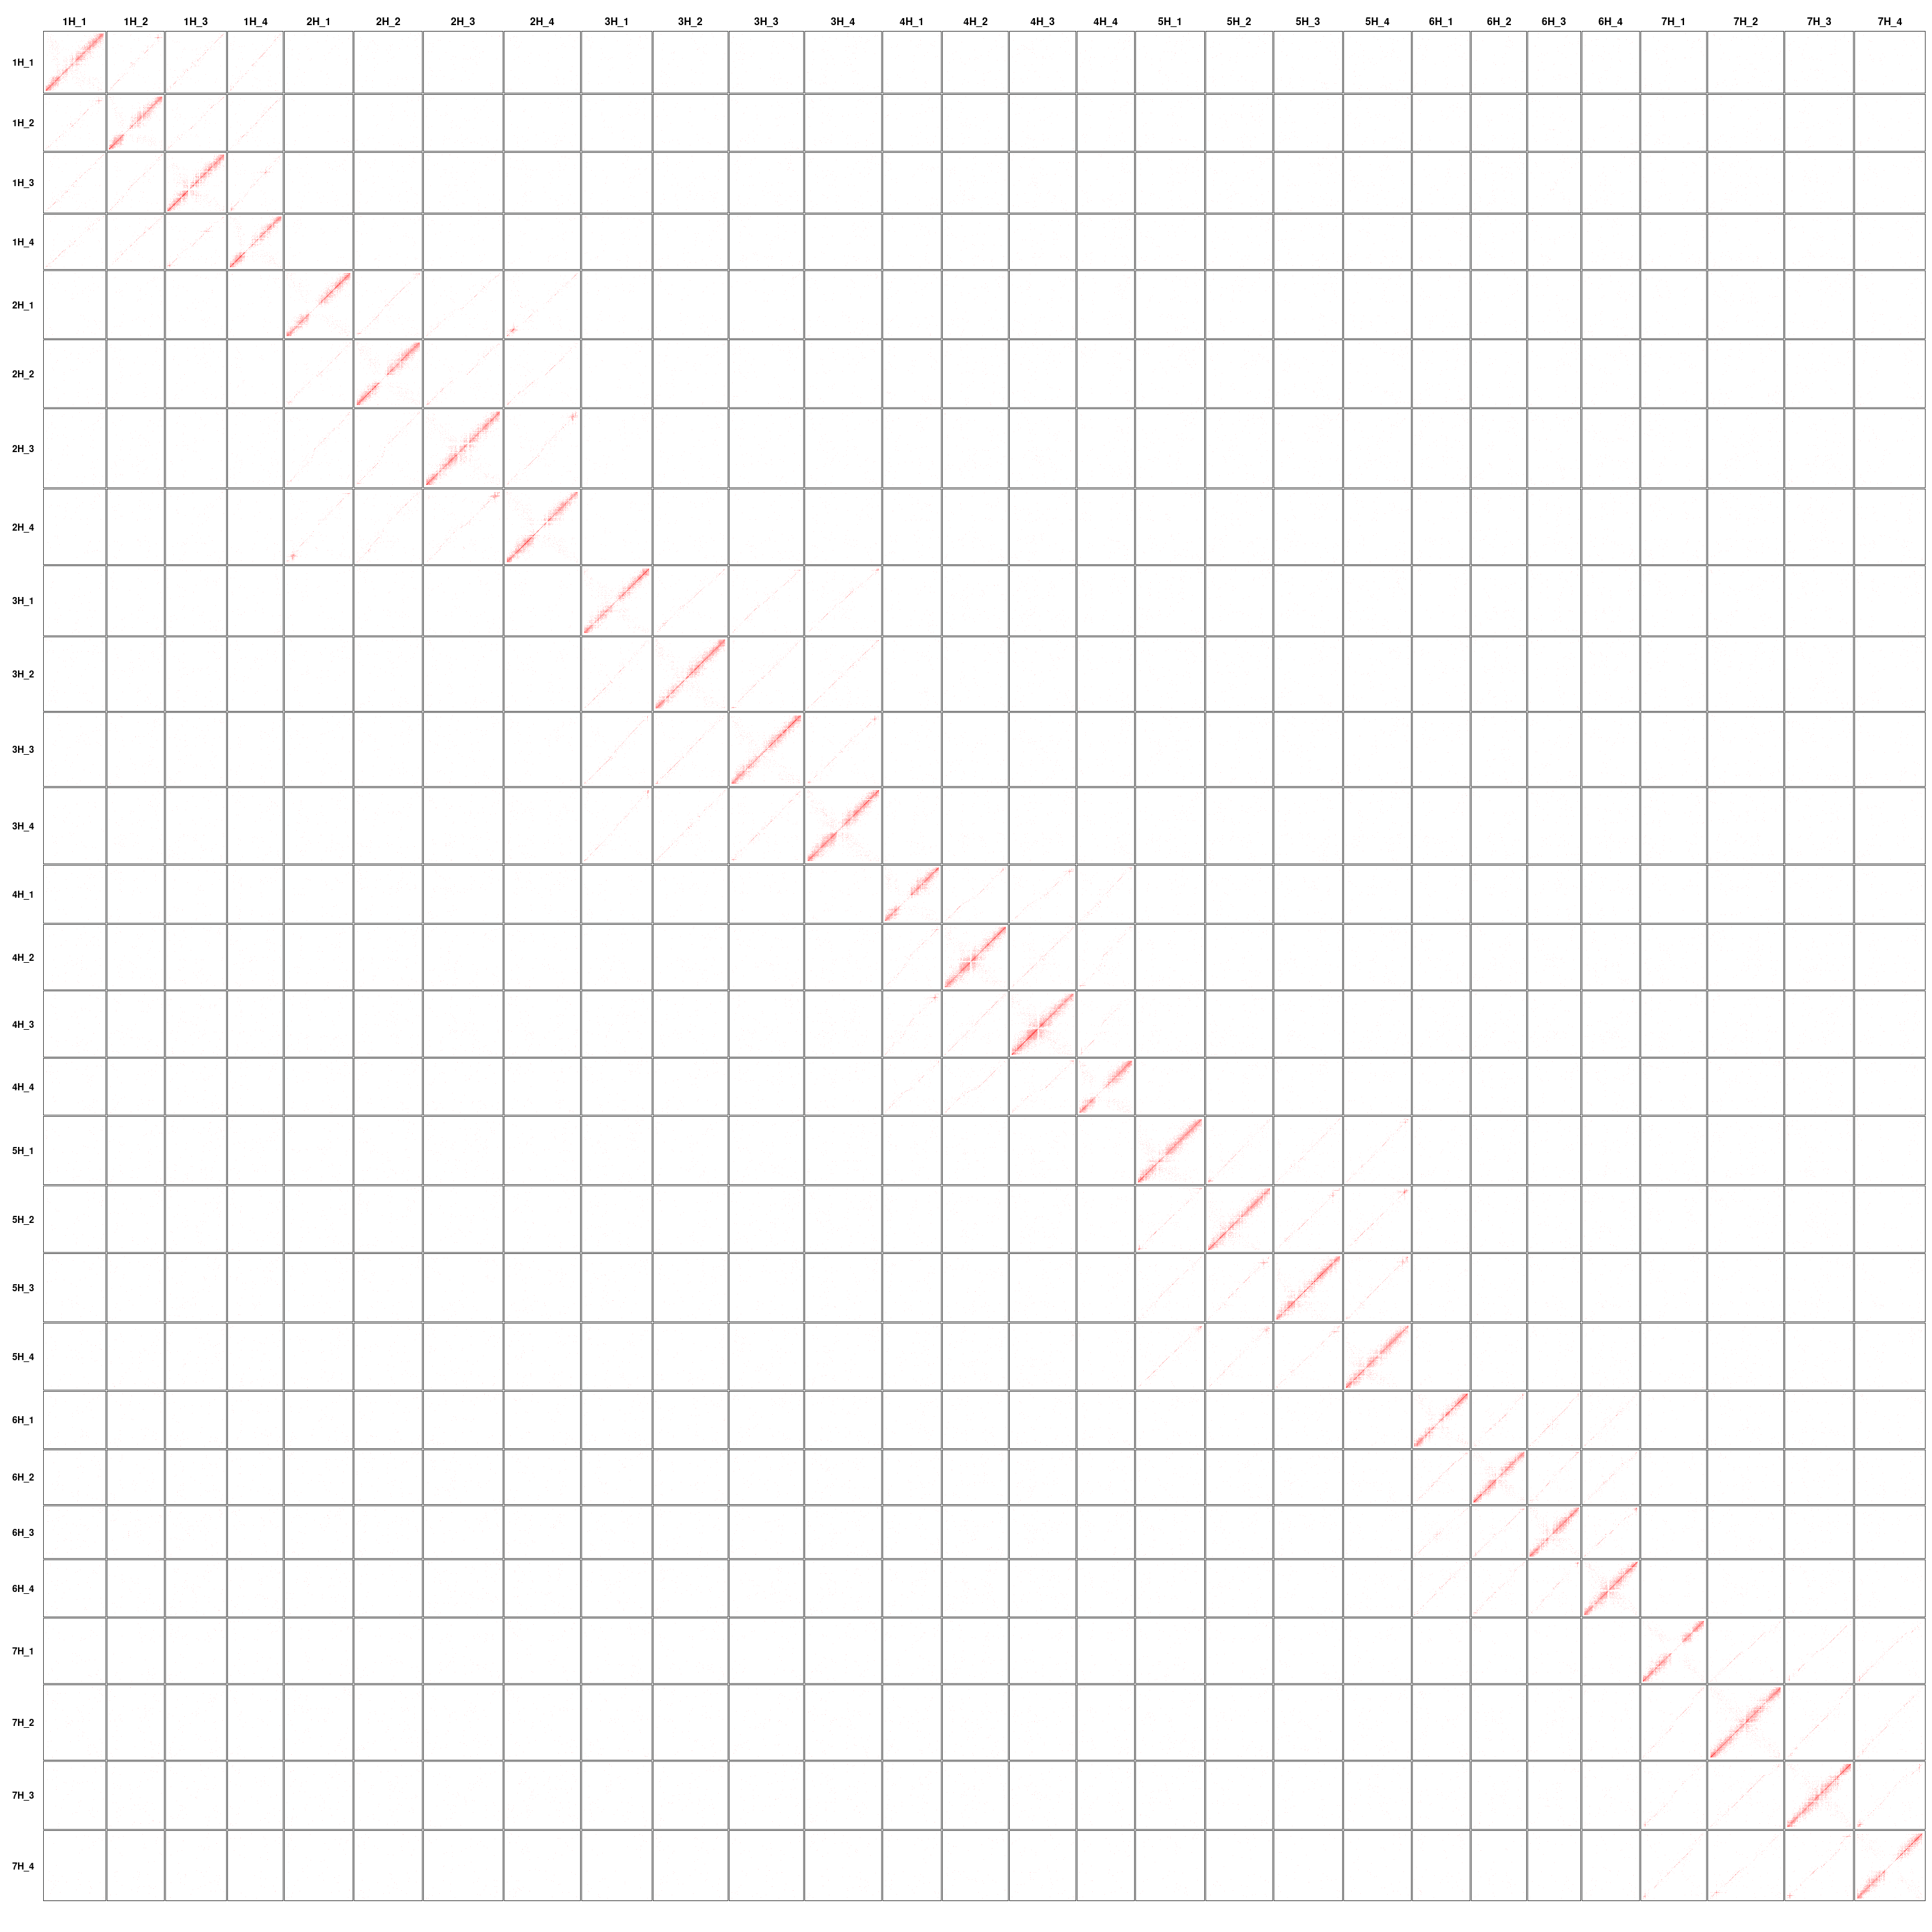


**Supplementary Figure 8: A40 Hi-C contact matrix.**


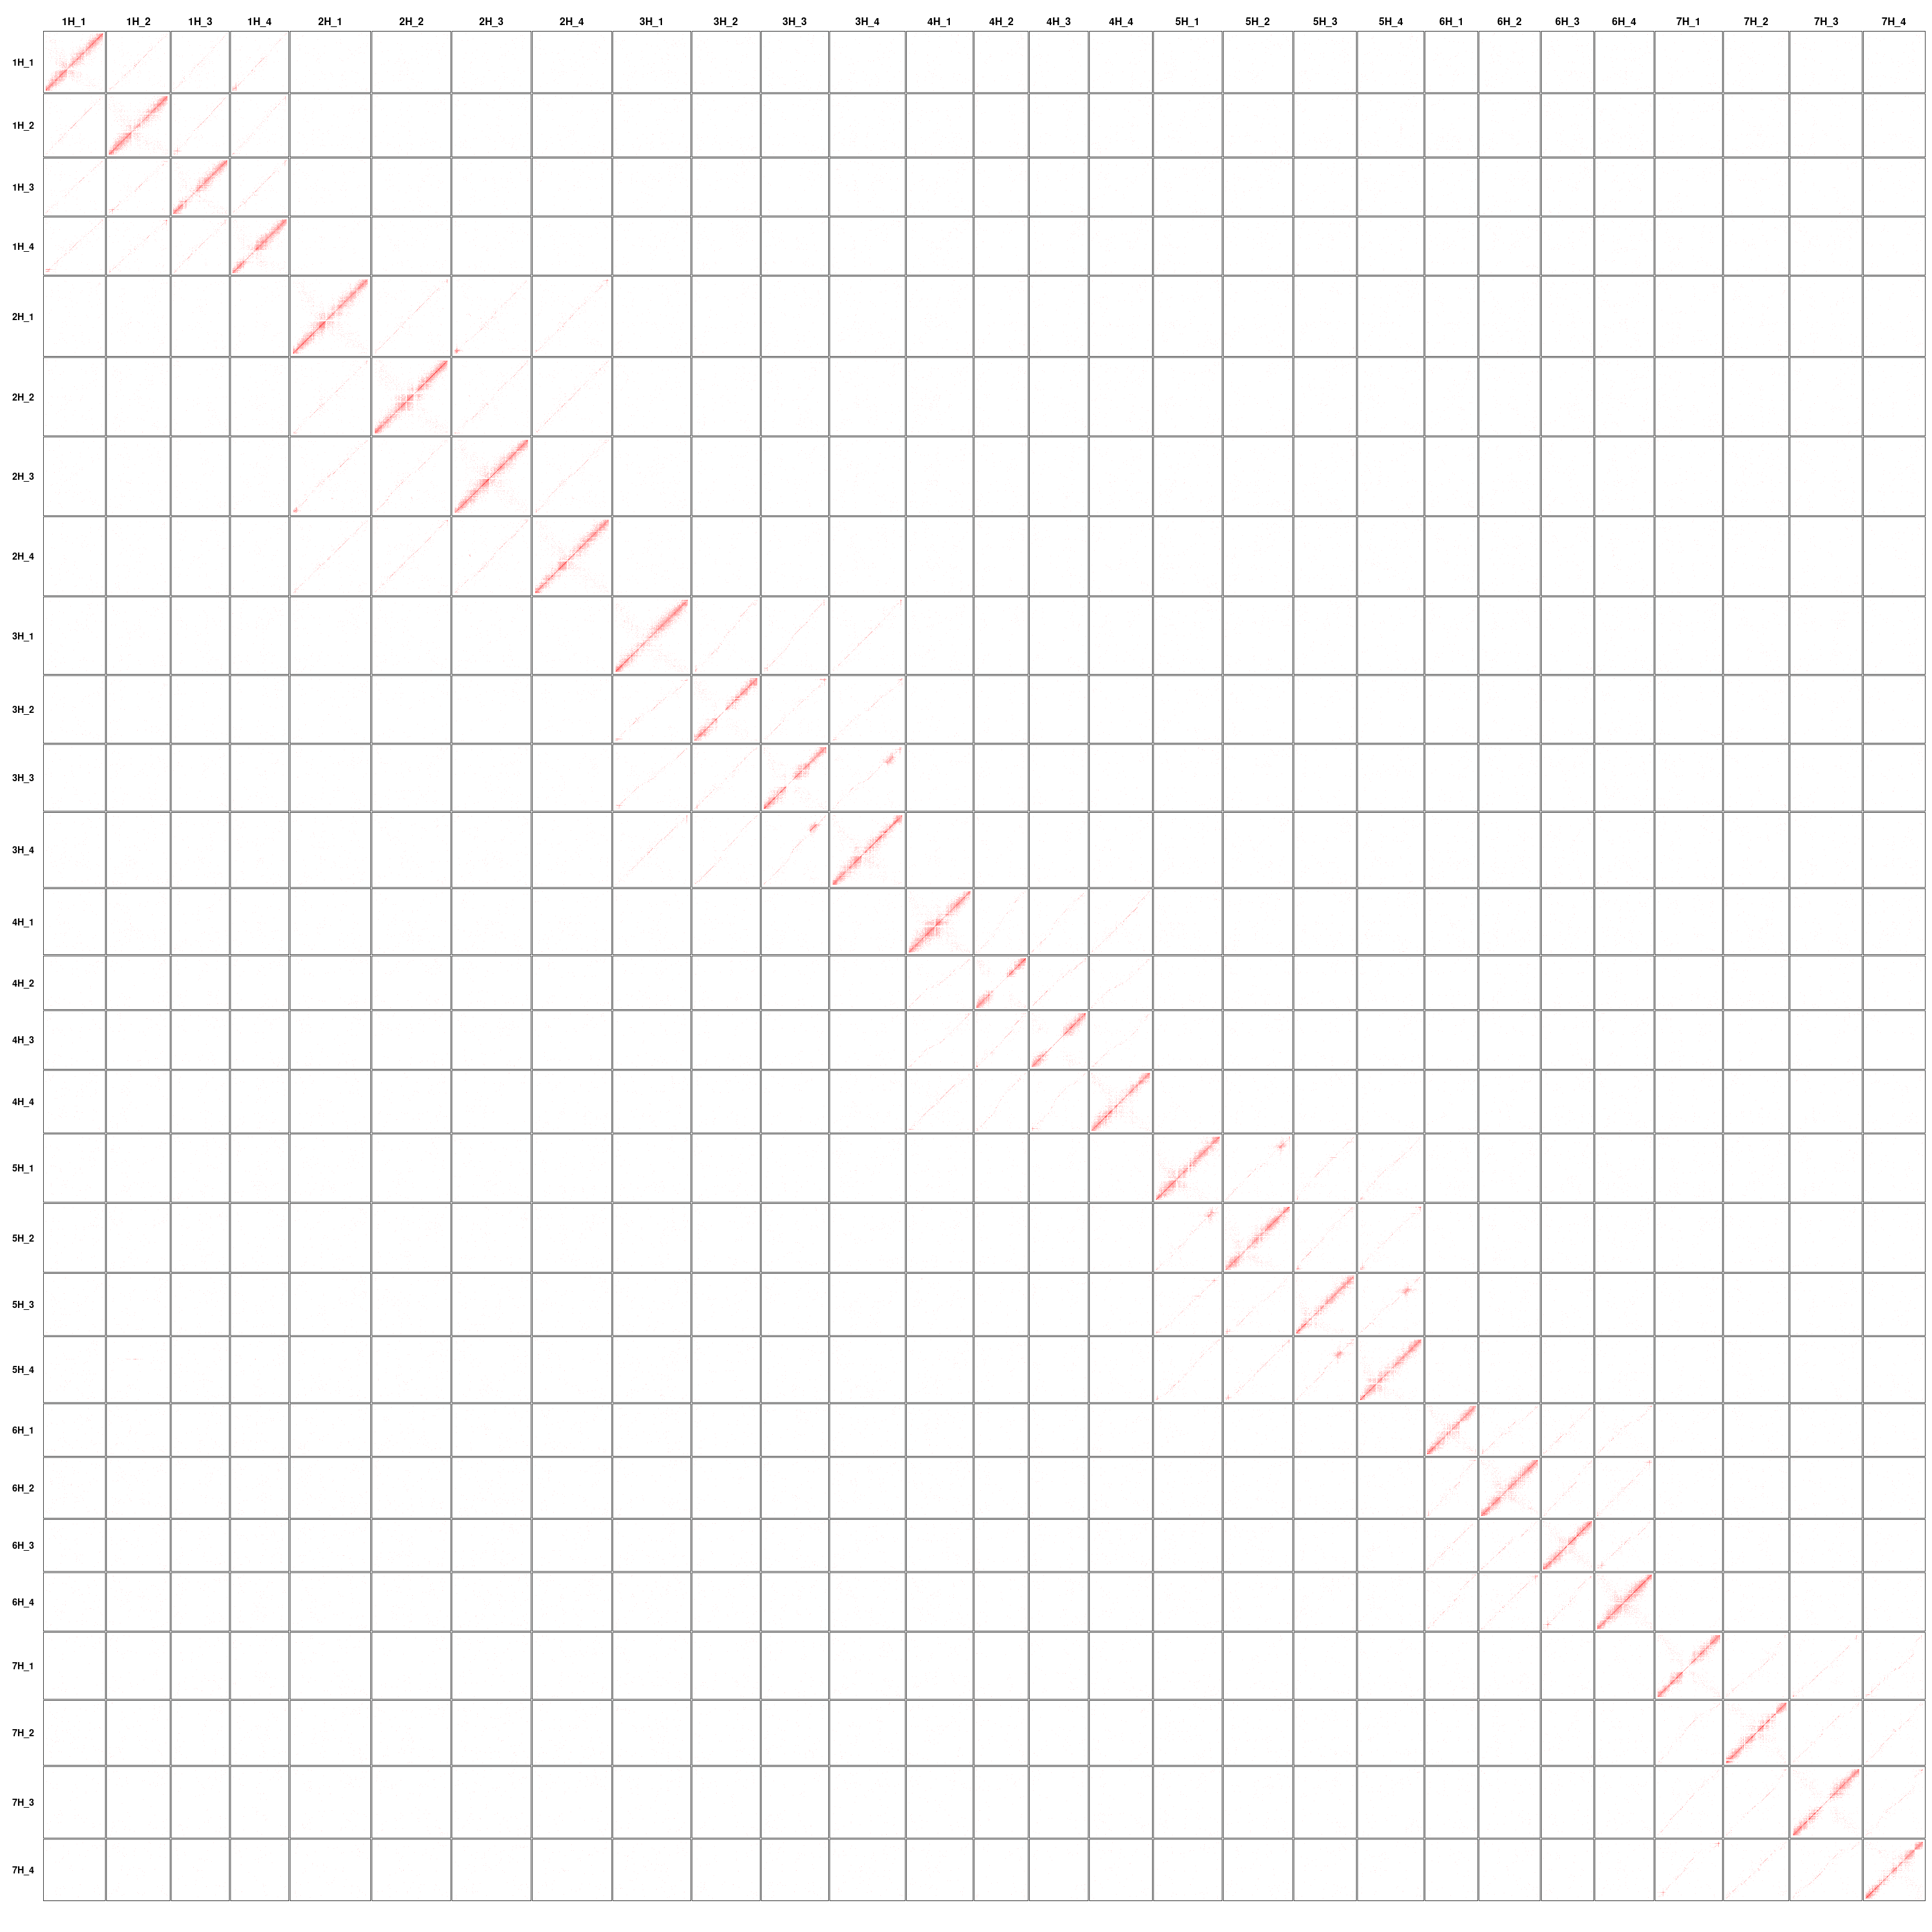


**Supplementary Figure 9: A42 Hi-C contact matrix.**

**Supplementary Figure 10: Estimation of local genome size change rates based on alignment in chr1H between *H. bulbosum* haplotype 1 and *H. vulgare* cv. Morex.** **(a)** Genome alignment between *H. bulbosum* haplotype 1 and Morex on chromosome 1H. (**b)** Alignments were fitted to a generalized additive model (GAM). **(c)** Estimated genome size change rate along the chromosome. The black horizontal line refers to the genome size change rate equal to 1 (no change).


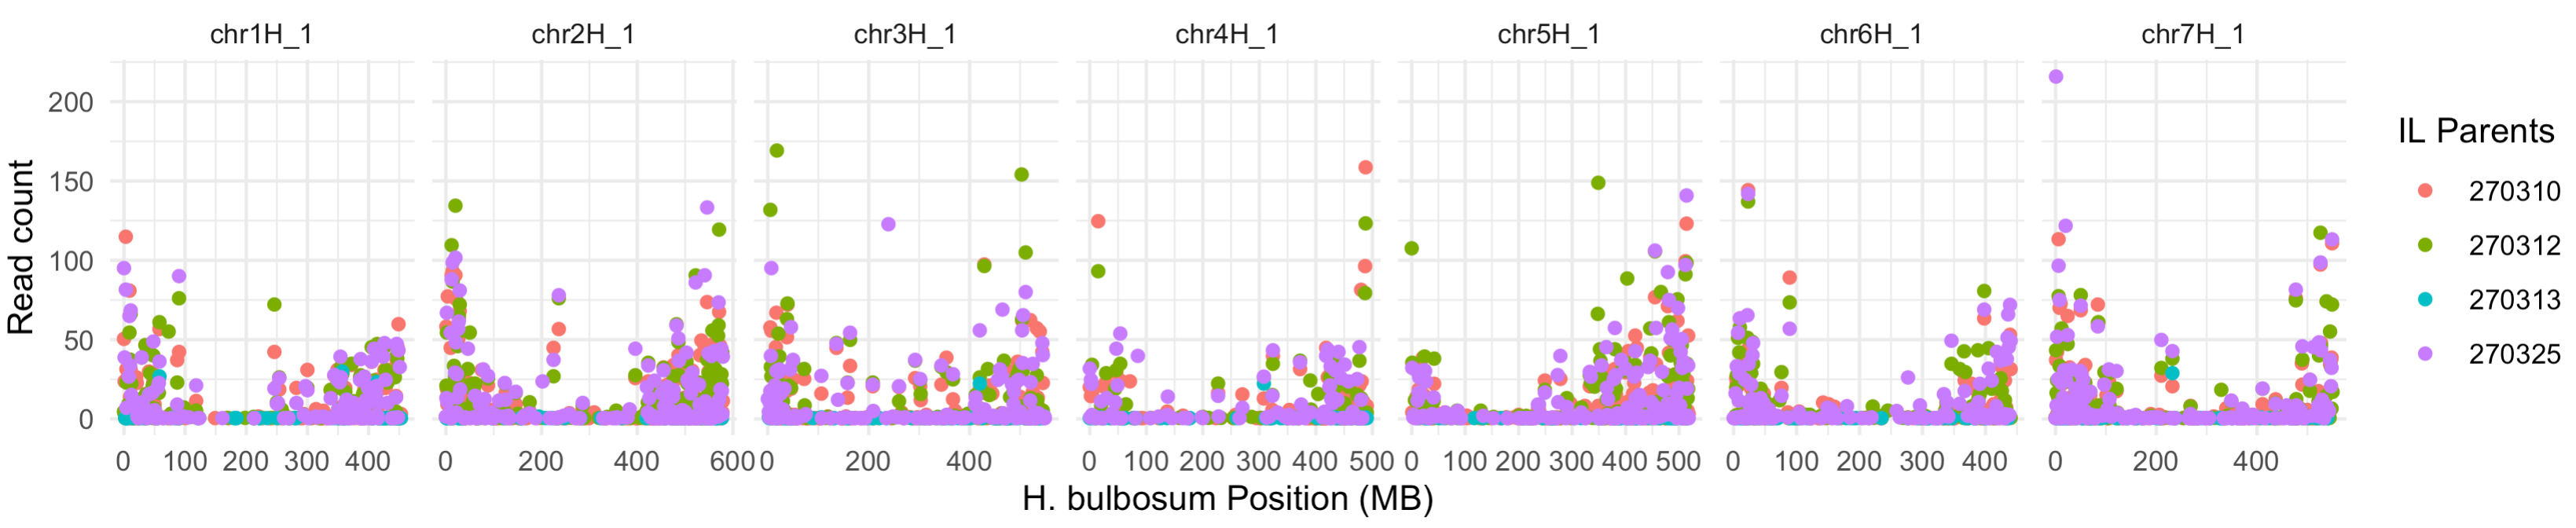
**Supplementary Figure 11. Distribution of read counts of barley parents of introgression lines aligned to the *H. bulbosum* genome*.***

*
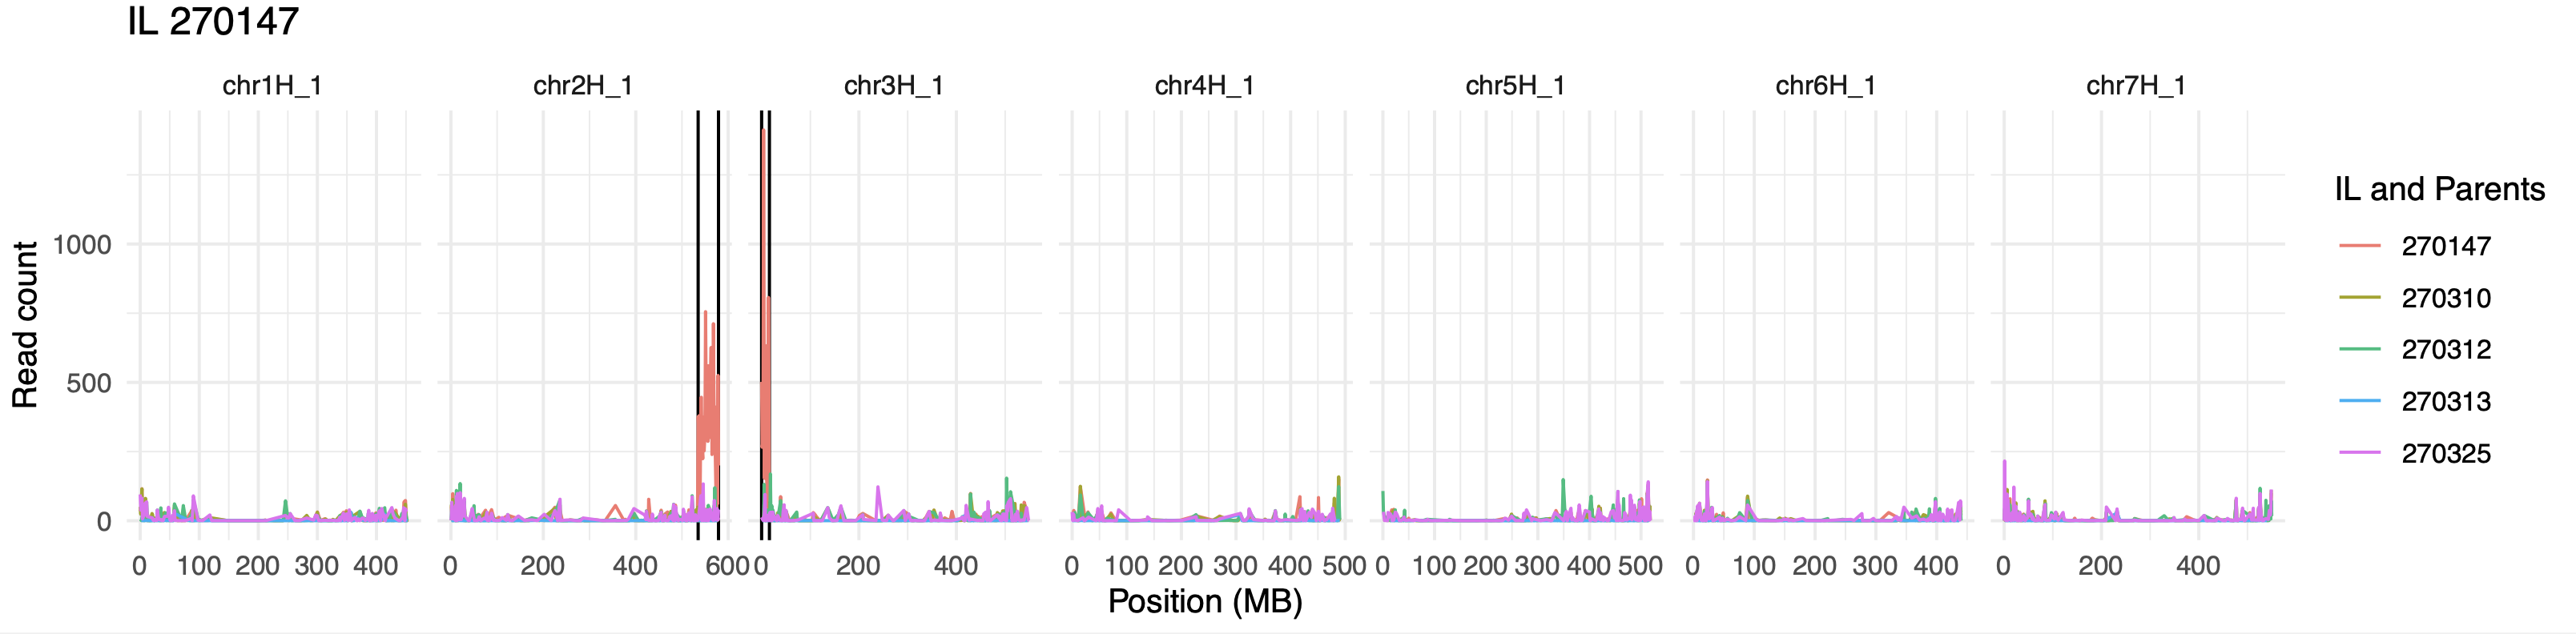
*

**Supplementary Figure 12. An example of identifying introgressed regions for introgression line sample 270147.**


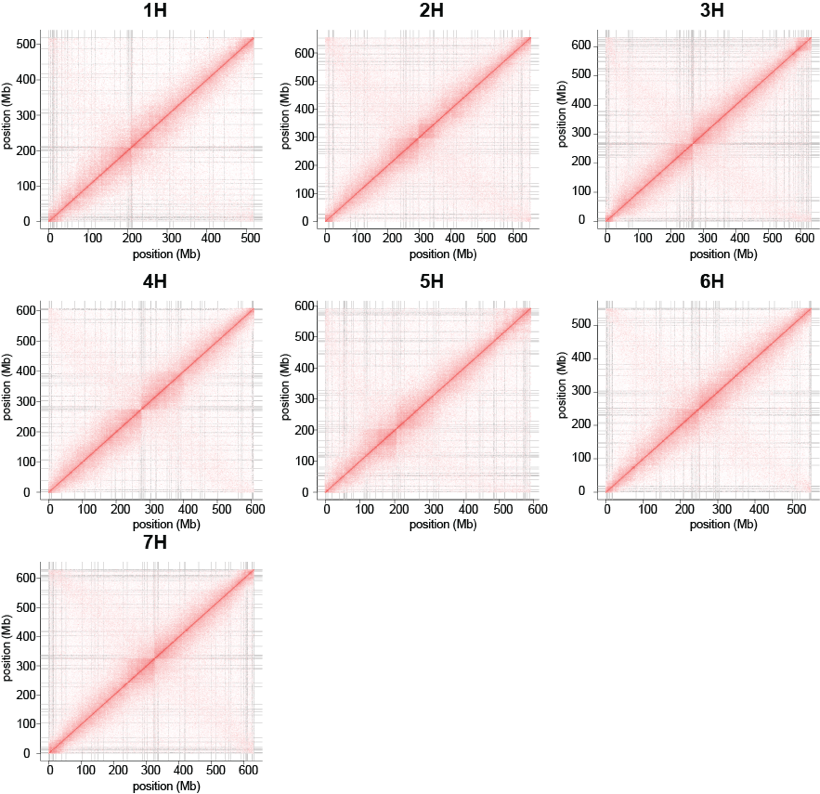


| **Accession** | **N50** | **Assembly size (bp)** | **unanchored contsize (bp)** | **Busco (embryophyta_odb9)** |
| --- | --- | --- | --- | --- |
| JKI-5215 | 28,413,266 | 4,271,127,017 | 76,377,195 | 96.60% |

**Supplementary Figure 13. JKI-5215 Hi-C contact matrix and assembly summary statistics.**

**Supplementary Figure 14. A17 assembly separation in the introgressed region of JK-5215.** **(a)** and **(b)** PCA clustering of the matrix of Hi-C links connecting the ends of contigs, i.e. those mapped to within 2 Mb of either contig end. Chromosome 3H of the tetraploid clone A17 is shown. Colors correspond to different haplotypes. R3 corresponds to contigs which are in the region of A17 haplotype 3 collinear to the JKI-5215 introgressed region. R4 corresponds to contigs which are in the region of A17 haplotype4 collinear to the JKI-5215 introgressed region. **(c)** PCA separation on haplotype 3 and haplotype 4 of A17 chromosome 3H after pseudomolecule construction and manual curation. R3 and R4 are the same as in **(a)** and **(b)**. **(d)** Hi-C contact matrix of the region of A17 collinear to the JKI-5215 introgressed region.


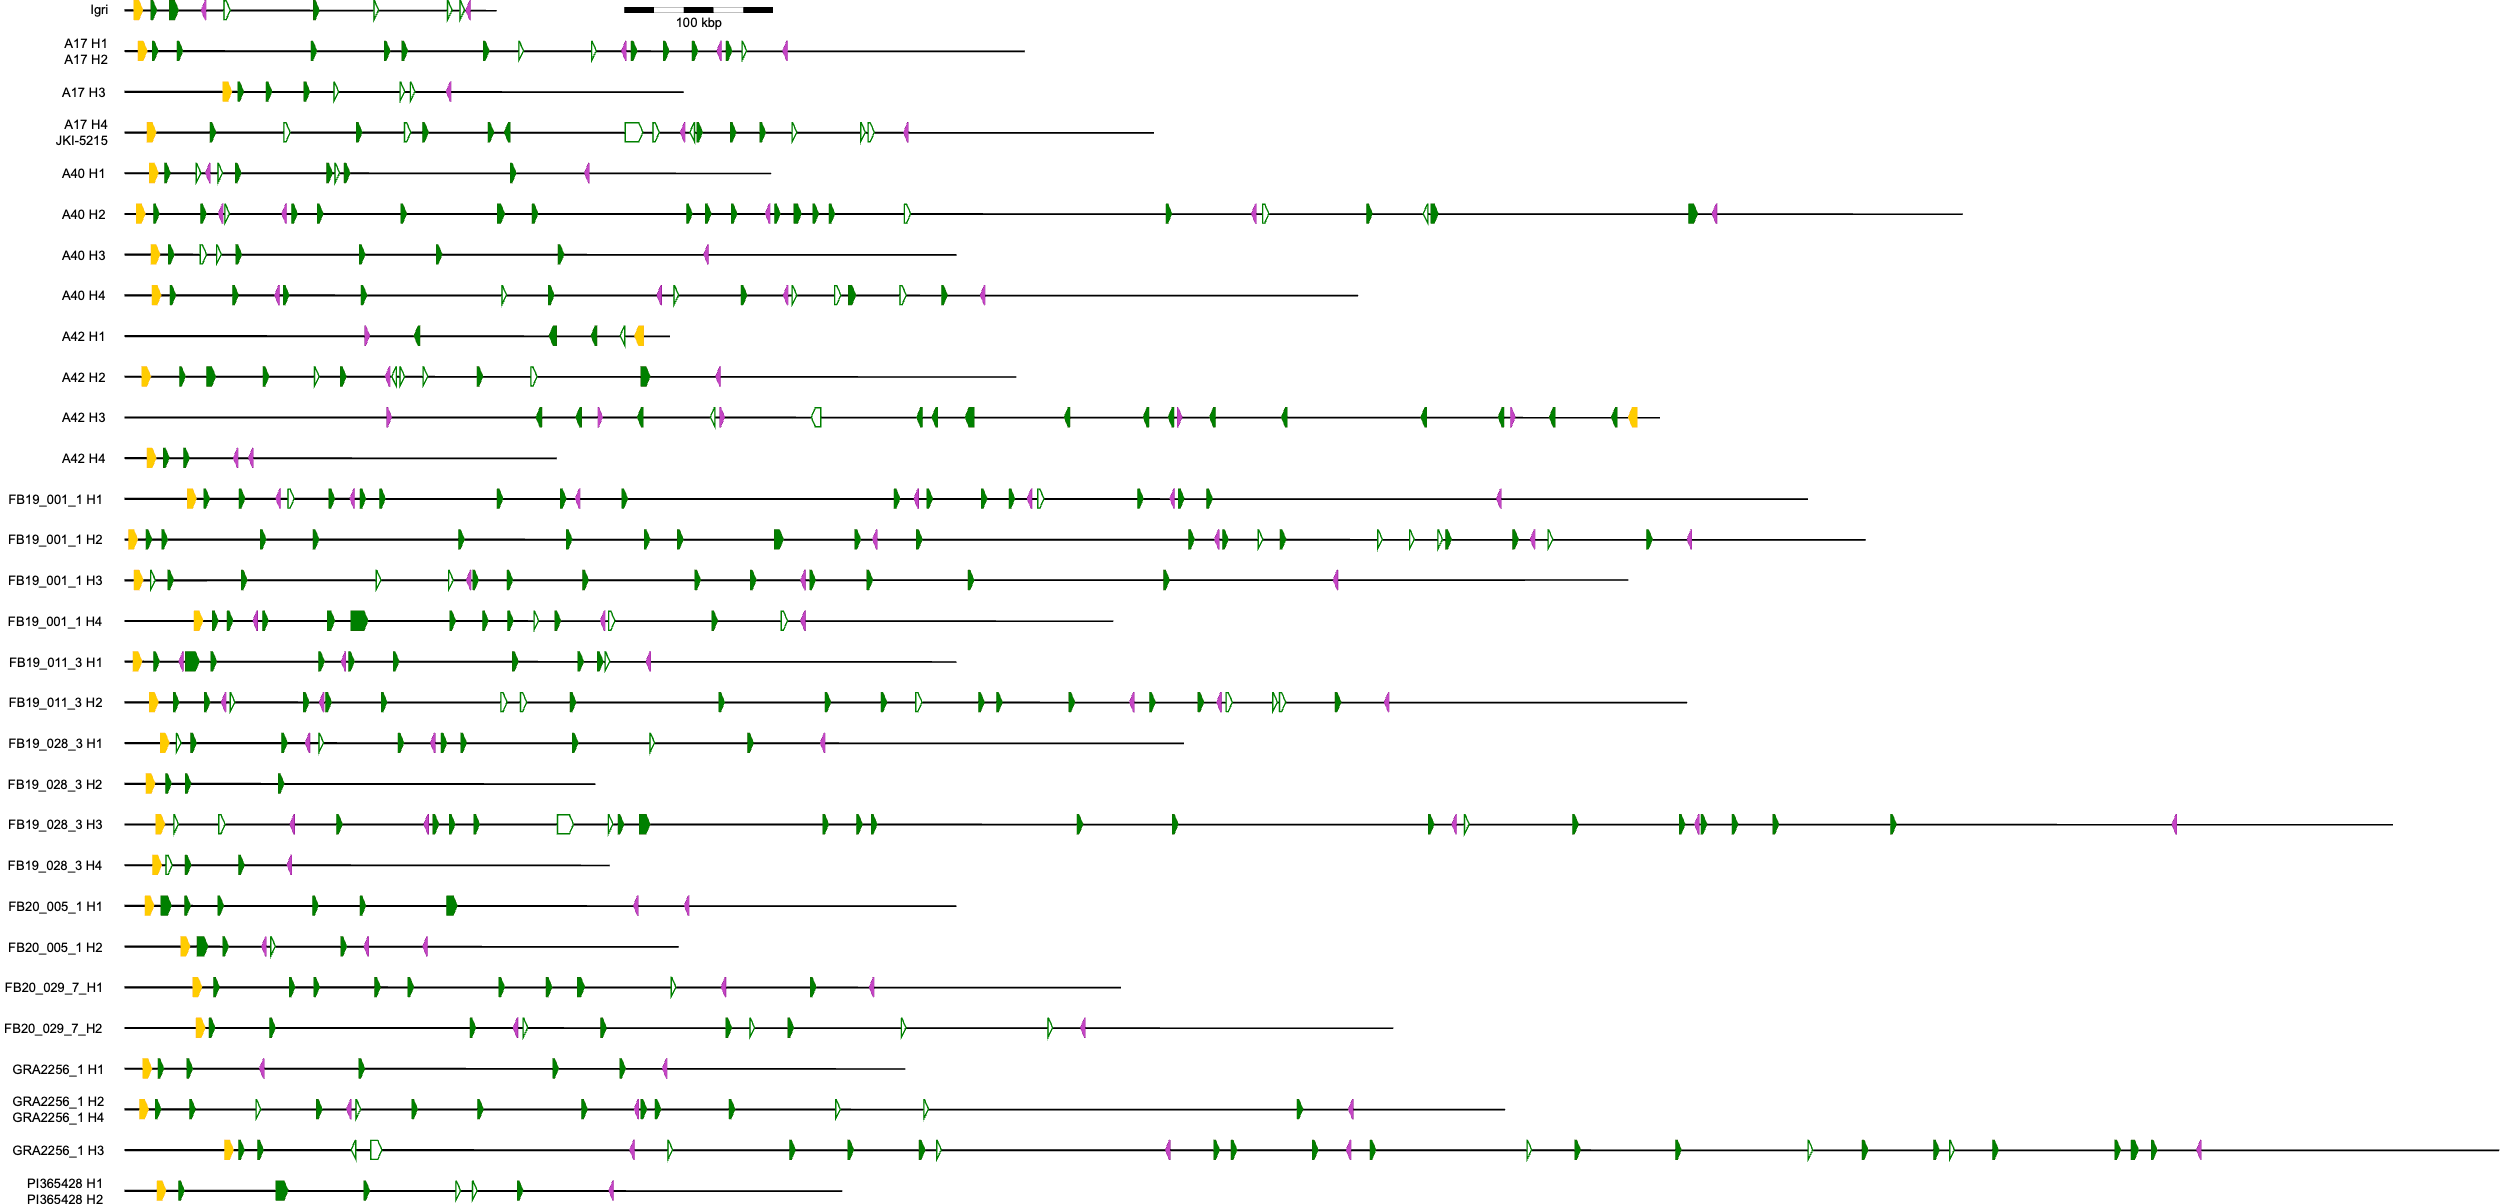


**Supplementary Figure 15. Gene content of the *Ryd4Hb* locus in the *H. bulbosum* pangenome.** The color code is: yellow – SFGH1, purple – APGG2, green – CC-NBARC-LRR genes as defined by NLR-annotator. Details on the genes are given in **Supplementary Table 13**.
