# Supplementary material for: A haplotype-resolved pangenome of the barley wild relative Hordeum bulbosum
Source: Research Square preprint supplement (doi:10.21203/rs.3.rs-3916840/v1), 2024-02-08
Supplement: Supplementary file 5 [file 401f840635f79b9fe43c7192.xlsx]

## Sheet: Feuil1
Morex annotated genes	Coordinates Morex	Confidence	Annotation Morex	Igri annotated genes	Start Igri	End Igri	Coordinates Igri	Coordinates A17_H4 gene duplication 1	Coordinates A17_H4 gene duplication 2	Coordinates A17_H4 gene duplication 3	Coordinates A17_H4 gene duplication 4	Coding polymorphisms Igri/A17_H4 duplication 1	Coding polymorphisms Igri/A17_H4 duplication 2	Coding polymorphisms Igri/A17_H4 duplication 3	Coding polymorphisms Igri/A17_H4 duplication 4	Coding polymorphisms Igri/A17_H1	Coding polymorphisms Igri/A17_H2	Coding polymorphisms Igri/A17_H3	Comments
HORVU.MOREX.r3.3HG0319280	594,622,773-594,626,954	high	Beta-1,3-glucanase	HORVU.IGRI.CNS.3HG00284720	594453369	594457456	594,453,369-594,457,456	478,383,116-478,385,980	-	-	-	early framshift and premature stop	-	-	-	same early frameshift as in A17_H4	same early frameshift as in A17_H4	same early frameshift as in A17_H4	Only 5' end in the interval
HORVU.MOREX.r3.3HG0319290	594,648,725-594,649,033	low	Homer protein homolog 1	-	-	-	-	-	-	-	-	-	-	-	-	-	-	-	Repetitive
-	-	-	-	HORVU.IGRI.CNS.3HG00284730	594487424	594488711	594,487,424-594,488,711	-	-	-	-	-	-	-	-	-	-	no start	Repetitive
HORVU.MOREX.r3.3HG0319300	594,699,354-594,701,563	high	Beta-1,3-glucanase	HORVU.IGRI.CNS.3HG00284740	594499602	594501429	594,499,602-594,501,429	478,475,677-478,477,634	478,553,516-478,554,832	-	-	13 aa substitutions + 4 aa insertion	exon 2 missing	-	-	identical to A17_H4 duplication 1	identical to A17_H4 duplication 1	14 aa substitutions + 5 aa insertion
HORVU.MOREX.r3.3HG0319310	594,712,025-594,712,888	high	F-box protein	HORVU.IGRI.CNS.3HG00284750	594509960	594511633	594,509,960-594,511,633	478,516,442-478,517,305	478,580,091-478,580,950	-	-	38 aa subtitutions	identical to duplication 1	-	-	36 aa subtitutions	36 aa subtitutions	38 aa subtitutions
HORVU.MOREX.r3.3HG0319320	594,721,495-594,725,844	high	RecA	HORVU.IGRI.CNS.3HG00284760	594524934	594529293	594,524,934-594,529,293	478,525,938-478,530,304	478,540,567-478,544,933	478,589,584-478,593,950	-	Missing start (5 first aa)	identical to duplication 1	identical to duplication 1	-	2 duplications both with a functional start	2 duplications both with a functional start	single gene with a functional start
-	-	-	-	HORVU.IGRI.CNS.3HG00284770	594532851	594533508	594,532,851-594,533,508	478,505,843-478,506,501	478,569,488-478,570,146	-	-	16 aa substitutions	identical to duplication 1	-	-	23 aa substitutions + 2 aa insertions	23 aa substitutions + 2 aa insertions	18 aa substitutions	Repetitive
-	-	-	-	HORVU.IGRI.CNS.3HG00284780	594565968	594568232	594,565,968-594,568,232	-	-	-	-	-	-	-	-	-	-	-	Repetitive
HORVU.MOREX.r3.3HG0319330	594,731,099-594,738,322	high	Sentrin-specific protease	HORVU.IGRI.CNS.3HG00284790	594601960	594609039	594,601,960-594,609,039	478,648,260-478,657,004	478,699,192-478,708,459	478,728,817-478,737,870	478,744,022-478,753,054	1 bp insertion and early stop (exon 3/13)	1 bp insertion and early stop (exon 3/13)	early stop (exon 2/13)	1 bp insertion and early stop (exon 3/13)	5 duplications: all with the 1bp insertion	5 duplications: all with the 1bp insertion	5 duplications: all with the 1bp insertion
HORVU.MOREX.r3.3HG0319340	594,744,042-594,747,817	high	voltage-dependent L-type calcium channel subunit	HORVU.IGRI.CNS.3HG00284800	594614860	594617989	594,614,860-594,617,989	478,855,162-478,858,693	-	-	-	8 aa substitutions	-	-	-	8 aa substitutions	8 aa substitutions	8 aa substitutions
HORVU.MOREX.r3.3HG0319350	594,748,418-594,749,859	high	Annexin	HORVU.IGRI.CNS.3HG00284810	594619228	594620468	594,619,228-594,620,468	478,859,285-478,860,503	-	-	-	early frameshift and premature stop	-	-	-	same early frameshift as in A17_H4	same early frameshift as in A17_H4	same early frameshift as in A17_H4
HORVU.MOREX.r3.3HG0319360	594,764,653-594,766,566	high	Amino acid permease	HORVU.IGRI.CNS.3HG00284820	594635569	594637477	594,635,569-594,637,477	479,028,246-479,030,170	-	-	-	12 aa substitutions	-	-	-	14 aa substitutions	14 aa substitutions	15 aa substitutions
-	-	-	-	HORVU.IGRI.CNS.3HG00284830	594643655	594644011	594,643,655-594,644,011	479,039,958-479,040,425	-	-	-	no start	-	-	-	no start	no start	no start	correspond to the 3' UTR of HORVU.MOREX.r3.3HG0319370
HORVU.MOREX.r3.3HG0319370	594,772,628-594,783,366	high	Acetyl-CoA carboxylase	HORVU.IGRI.CNS.3HG00284840	594644015	594654290	594,644,015-594,654,290	479,040,423-479,050,760	-	-	-	7 aa substitutions within interval	-	-	-	7 aa substitutions within interval	7 aa substitutions within interval	9 aa substitutions within interval	Only 3' end in the interval
Note: Coordinates refer to the chromosome 3H of the corresponding genome. Low confidence annotations are greyed
