# Supplementary material for: A haplotype-resolved pangenome of the barley wild relative Hordeum bulbosum
Source: Research Square preprint supplement (doi:10.21203/rs.3.rs-3916840/v1), 2024-02-08
Supplement: Supplementary file 6 [file 438ebae2a72ff2d2997cd10c.xlsx]

## Sheet: Sheet1
Accession	Haplotype	Copia	Gypsy	LTR_unknown	CACTA	Mutator	PIF_Harbinger	Tc1_Mariner	hAT	piggyBac	unknown	SINE_element	helitron	Total
FB19_011_3	Haplotype1	658917573	1856767570	122284643	224348767	61368317	36788076	50359325	8399350	0	1031693	19256154	55607907	3095129375
FB19_011_3	Haplotype2	568480548	1866573365	219020903	232142821	60871829	39338088	49897631	8305420	0	1061319	19108241	64002630	3128802795
FB19_011_3	Unanchor	9015242	24337567	816016	6598607	4664482	345055	844671	85176	0	20252	280937	666923	47674928
FB20_029_7	Haplotype1	658693650	1872842875	110586644	215435059	65581859	35400287	49554971	8113158	0	978963	18723105	66114653	3102025224
FB20_029_7	Haplotype2	660214565	1876814699	108964603	223933052	74348395	36053445	50381030	10410312	0	1011174	18964259	58960454	3120055988
FB20_029_7	Unanchor	23214443	86353142	8689422	26344261	3586908	983767	1807655	268957	0	60215	1437033	2072630	154818433
FB20_005_1	Haplotype1	553726010	1723587887	285229682	220077284	70590590	35189564	47919588	8971171	0	1020301	18550472	49702316	3014564865
FB20_005_1	Haplotype2	639290606	1784960669	105828830	212414668	57655530	34777307	51904183	8263054	0	964735	18458609	46653558	2961172024
FB20_005_1	Unanchor	68427858	212403668	7367529	46204803	21648531	2909133	4280338	738146	0	156510	2561134	4510060	371207710
PI365428	Haplotype1	667075441	1817362690	85903355	231957450	76934000	37033936	50907881	7644717	0	988414	18675922	50074548	3044558354
PI365428	Haplotype2	556325941	1774223509	183835461	229968080	63368621	36123023	71616860	7142166	0	988343	18450672	46821315	2988863991
PI365428	Unanchor	36086988	164973003	6248026	21417429	2329689	776825	1375215	234852	0	54141	1072464	1350339	235918971
FB19_001_1	Haplotype1	481253597	1505648202	250081494	193006710	61980644	33597016	47061476	7420142	0	914620	17146696	42094633	2640205230
FB19_001_1	Haplotype2	628488262	1812629791	83106136	210802613	56297666	37147729	50426385	7806938	0	984726	18525128	58273057	2964488431
FB19_001_1	Haplotype3	498852964	1624471026	178024142	200268019	59728953	33164473	43578711	7943804	0	943167	17634737	51525543	2716135539
FB19_001_1	Haplotype4	555528921	1574131871	72076105	187640966	49122405	31276297	46081952	7817317	0	876872	16586663	45836702	2586976071
FB19_001_1	Unanchor	241957534	754302222	34232437	105372415	20555095	10766565	15434423	2405475	0	416899	7526995	13500013	1206470073
FB19_028_3	Haplotype1	601902746	1702161746	85929912	198392568	57617508	33363550	49621319	7918968	0	941950	17976258	44470950	2800297475
FB19_028_3	Haplotype2	637579841	1700062500	229543548	219823469	55432589	36239374	49392114	8784839	80	974281	18831209	51585385	3008249229
FB19_028_3	Haplotype3	591848378	1704618982	97933028	200894825	52133435	33212807	50117443	7473683	0	925642	17792040	42064369	2799014632
FB19_028_3	Haplotype4	612909820	1725146900	99593486	203515390	54208199	35114581	50593017	7826345	0	952935	18050164	40024290	2847935127
FB19_028_3	Unanchor	183639465	526429754	65615911	89970381	43944501	11307719	14816062	1812055	0	346873	6265302	17473880	961621903
GRA2256_1	Haplotype1	604880301	1643818077	93737484	190635515	47783820	32958382	49101081	7462993	0	936216	17203661	41574131	2730091661
GRA2256_1	Haplotype2	587288681	1709848277	77578117	188919985	46434852	33642057	47457347	7846722	0	895898	17294598	56657731	2773864265
GRA2256_1	Haplotype3	518648938	1826629857	172148098	196787513	47676706	34302047	45390196	6937966	0	884746	17371166	46692150	2913469383
GRA2256_1	Haplotype4	525155428	1762905649	254526928	203017809	56131602	35802524	48476909	8161812	0	956620	18105684	53492300	2966733265
GRA2256_1	Unanchor	158718207	429645805	67143186	85197122	18405037	9366692	16119061	2526499	400	353691	7247372	15974089	810697161
A17	Haplotype1	617411367	1712775554	118298969	201863296	51013088	35041209	50906019	7229112	0	945842	17731208	42420390	2855636054
A17	Haplotype2	599302872	1671340874	88052442	203795086	51512883	34848173	50090344	7957954	80	932581	18019467	41356502	2767209258
A17	Haplotype3	515676017	1769416562	176172608	200256829	49757057	34395583	49525668	6937072	0	951097	17689488	46384064	2867162045
A17	Haplotype4	525881873	1741845811	190868596	201699016	51497419	35918151	44232739	7270088	80	949071	18125997	43330241	2861619082
A17	Unanchor	113492092	324827886	100239829	59929934	10803245	6338750	46698259	1514452	0	259425	4421249	8918407	677443528
A40	Haplotype1	606412896	1654134642	101000054	195820591	48887316	36403289	48448582	7455821	80	986057	18254560	54892367	2772696255
A40	Haplotype2	516791277	1778825450	175921509	198455552	50261689	35187191	48386893	7551388	80	983638	18209103	54427056	2885000826
A40	Haplotype3	617065360	1738857081	96886745	201953949	53196964	34953846	50164416	6787451	0	946622	18281519	54079581	2873173534
A40	Haplotype4	610848360	1722764939	81963361	200145876	50409192	35804349	48189529	7258240	0	981608	17839150	55489454	2831694058
A40	Unanchor	159993426	579475072	23799641	92056183	39788989	8620654	14173150	2401569	0	390742	6515905	14732656	941947987
A42	Haplotype1	518154069	1611904911	354581419	200052886	56081977	36883448	48428626	7204892	80	983914	18182979	47338963	2899798164
A42	Haplotype2	599763820	1704957727	88339781	200286809	51387526	33444279	46241490	7286383	0	987992	17508658	48959625	2799164090
A42	Haplotype3	585260189	1626296039	90137983	187188173	51941401	33330803	45242176	6578773	0	933240	17365833	50809043	2695083653
A42	Haplotype4	647953211	1655248578	122072039	199006745	49078892	35808156	41486931	7108514	0	994487	17778034	47399334	2823934921
A42	Unanchor	180069969	660821309	136333363	94326596	38018951	12160933	25066940	2207420	0	402887	7375334	13345515	1170129217
