# Supplementary material for: A haplotype-resolved pangenome of the barley wild relative Hordeum bulbosum
Source: Research Square preprint supplement (doi:10.21203/rs.3.rs-3916840/v1), 2024-02-08
Supplement: Supplementary file 7 [file 448f2625dbe5c4c07a60513b.xlsx]

## Sheet: Sheet1
Study accession	NordGen accession	IL code (New Zealand)	DH	crossing scheme	hybrid breeding	IPK ID (final)	Anne LIMS	Type	introgression location - NZ	introgression location - GBS	Relocation	Potential haplotype
PRJEB7908	NGB22914	81882		Vada x S1	2	IL_1	270143	IL	2HS	2HS, 3HL small	chr2H_1,0,19000000;chr3H_1,545000000,546000000;
PRJEB7908	NGB22876	102C2/11/1/2/6/5		Emir x 2032	2	IL_2	270145	IL	2HL	2HL	chr2H_1,560000000,579000000;
PRJEB7908	NGB22926	102C2/13/2/16	238V2	Emir x 2032	2	IL_3	270146	IL	3HS	3HS	chr3H_1,0,16000000;
PRJEB7908	NGB22877	102C2/13/3	240B2	Emir x 2032	2	IL_4	270147	IL	2HL	2HL, 3HS	chr2H_1,535000000,579000000;chr3H_1,0,16000000;
PRJEB7908	NGB22909	102C2/14/3/2		Emir x 2032	2	IL_5	270148	IL	2HL	2HL	chr2H_1,564000000,580000000;
PRJEB7908	NGB22910	102C2/15/1/11/5		Emir x 2032	2	IL_6	270149	IL	2HL	2HL	chr2H_1,557000000,580000000;
PRJEB7908	NGB22865	102C2/16/2/M1-3		Emir x 2032	2	IL_7	270150	IL	2HL	2HL	chr2H_1,556000000,580000000;
PRJEB7908	NGB22932	102C2/33/1/1/1		Emir x 2032	2	IL_8	270151	IL	4HL	4HL	chr4H_1,467000000,491000000;
PRJEB7908	NGB22997	102C2/40/1/M1/M1/IPK1		Emir x 2032	2	IL_9	270152	IL	2HS (plant 1), 7HL (plant 2)	4HL (het), 7HL small (het)	chr4H_1,475000000,476000000;chr7H_1,546000000,551000000;
PRJEB7908	NGB22916	102C2/60/7/1-4/1/M1		Emir x 2032	2	IL_10	270153	IL	2HS	2HS	chr2H_1,4000000,52000000;
PRJEB7908	NGB22879	102C2/70/M2/1		Emir x 2032	2	IL_11	270154	IL	2HL	2HL	chr2H_1,531000000,579000000;
PRJEB7908	NGB23010	103K5/1/M1	293G8/IPK6	Emir x 3811/5	2	IL_13	270156	IL	7HL	7HL small	chr7H_1,548000000,551000000;
PRJEB7908	NGB22985	119Y4/4/5/10		Emir x (2920/4 x 2929/1)	3	IL_14	270157	IL	6HS, 7HS, 7HL	6HS, 7HS, 7HL	chr6H_1,2000000,42000000;chr7H_1,0,23000000;chr7H_1,536000000,551000000;
PRJEB7908	NGB22984	120G4/2/1/1/3		Emir x (2920/4 x 2929/1)	3	IL_15	270158	IL	6HS, 7HS	6HS, 7HS	chr6H_1,2000000,42000000;chr7H_1,2000000,32000000;
PRJEB7908	NGB22962	164C4/2/M5/M1/M3	320L1	Emir x 2920/4	1	IL_16	270159	IL	6HL	6HL	chr6H_1,437000000,441000000;
PRJEB7908	NGB22851	169H3/M3	333Y1	Emir x PI 204579	1	IL_17	270160	IL	1HL	1HL	chr1H_1,431000000,454000000;
PRJEB7908	NGB22933	169P15/8		Emir x A17/1	3	IL_18	270161	IL	4HL	1HS small, 4HL	chr1H_1,0,4000000;chr4H_1,483000000,491000000;
PRJEB7908	NGB22860	169P2/M2	290L4	Emir x A17/1	3	IL_19	270162	IL	1HL, 2HL, 7HS	1HL small, 2HL, 7HS small	chr1H_1,447000000,454000000;chr2H_1,569000000,579000000;chr7H_1,0,4000000;
PRJEB7908	NGB22881	169P22/M2	292J11	Emir x A17/1	3	IL_20	270163	IL	2HL	2HL, 7HS small	chr2H_1,563000000,579000000;chr7H_1,0,1000000;
PRJEB7908	NGB22882	169P5/M1/M2/M1	320P2	Emir x A17/1	3	IL_21	270164	IL	2HL	2HL	chr2H_1,557000000,580000000;
PRJEB7908	NGB22972	16R1/10/6	170R1	Emir x (2920/4 x 2929/1)	3	IL_22	270165	IL	6HS	6HS	chr6H_1,2000000,42000000;
PRJEB7908	NGB23008	16R1/10/8/2/3	216A1/M1/3/3/2	Emir x (2920/4 x 2929/1)	3	IL_23	270167	IL	6HS, 7HL	6HS, 7HL	chr6H_1,2000000,42000000;chr7H_1,531000000,551000000;
PRJEB7908	NGB23012	16R1/53-9		Emir x (2920/4 x 2929/1)	3	IL_24	270168	IL	6HS, disomic 7H substitution	6HS, disomic 7H substitution	chr6H_1,2000000,42000000;chr7H_1,0,518000000;chr7H_1,542000000,551000000;
PRJEB7908	NGB22863	174Q1/1/4/3/M1M1		Emir x PI 206443/3	1	IL_25	270169	IL	1HL, 6HS	1HL, 6HS	chr1H_1,440000000,454000000;chr6H_1,2000000,34000000;
PRJEB7908	NGB22991	177L11	210C1	Emir x A17/1	3	IL_26	270170	IL	7HL	7HL	chr7H_1,526000000,551000000;
PRJEB7908	NGB22992	177L20/6/2-8/1/1-14		Emir x A17/1	3	IL_27	270171	IL	7HL	7HL	chr7H_1,526000000,551000000;
PRJEB7908	NGB22924	177L20/6/2-8/2/1/1-2/21		Emir x A17/1	3	IL_28	270172	IL	2HS (het)	2HS (het)	chr2H_1,1000000,13000000;
PRJEB7908	NGB23005	177L29/M1/M2/M4	341N4/IPK2	Emir x A17/1	3	IL_29	270173	IL	4HL	2HL	chr2H_1,562000000,576000000;
PRJEB7908	NGB22923	177L6/9/1/2		Emir x A17/1	3	IL_30	270174	IL	2HS, 5HL	2HS, 5HL	chr2H_1,0,28000000;chr5H_1,502000000,516000000;
PRJEB7908	NGB22973	179S14/M2	325T1	Emir x 2920/4	1	IL_31	270175	IL	6HS	6HS	chr6H_1,2000000,11000000;
PRJEB7908	NGB22949	179S8/28/M3		Emir x 2920/4	1	IL_32	270176	IL	5HL	4HS	chr4H_1,0,12000000;
PRJEB7908	NGB23011	181P117/M1	301R4/IPK1	Emir x A17/1	3	IL_33	270178	IL	3HS?, 7HL	3HS small, 7HL small	chr3H_1,0,5000000;chr7H_1,547000000,551000000;
PRJEB7908	NGB23009	181P127/M2/M1/2/1	358M1	Emir x A17/1	3	IL_34	270179	IL	7HS	7HS small	chr7H_1,0,18000000;
PRJEB7908	NGB22913	181P129/M6		Emir x A17/1	3	IL_35	270180	IL	2HL?, 4HS	4HS small	chr4H_1,0,3000000;
PRJEB7908	NGB22868	181P138/2/M1/M1		Emir x A17/1	3	IL_36	270181	IL	1HS	1HS	chr1H_1,0,12000000;
PRJEB7908	NGB22869	181P142/M6/M4	303K	Emir x A17/1	3	IL_37	270182	IL	1HS	1HS	chr1H_1,0,10000000;
PRJEB7908	NGB22998	181P145/M2	299G1/IPK4	Emir x A17/1	3	IL_38	270183	IL	2HS	2HS small	chr2H_1,0,4000000;
PRJEB7908	NGB22983	181P146/M1	295G2	Emir x A17/1	3	IL_39	270184	IL	6HS	6HS	chr6H_1,2000000,8000000;
PRJEB7908	NGB23003	181P151/M2/M1/M1/M3	343U3/IPK2	Emir x A17/1	3	IL_40	270185	IL	2HS?, 3HL	2HS small, 3HL small	chr2H_1,0,2000000;chr3H_1,548000000,550000000;
PRJEB7908	NGB22885	181P156/M1/M1	343X	Emir x A17/1	3	IL_41	270186	IL	2HL	2HL	chr2H_1,552000000,580000000;
PRJEB7908	NGB22934	181P158/2/M1/M1		Emir x A17/1	3	IL_42	270187	IL	4HL	4HL	chr4H_1,477000000,491000000;
PRJEB7908	NGB22950	181P168/M1/M1	299T1	Emir x A17/1	3	IL_43	270190	IL	5HL	5HL	chr5H_1,499000000,505000000;
PRJEB7908	NGB22883	181P17	300C18	Emir x A17/1	3	IL_44	270191	IL	2HL, 5HL?	2HL, 5HL	chr2H_1,532000000,580000000;chr5H_1,468000000,509000000;
PRJEB7908	NGB22957	181P17/M1	300C9	Emir x A17/1	3	IL_45	270192	IL	5HL	5HL	chr5H_1,468000000,518000000;
PRJEB7908	NGB22874	181P175/M3/M1	298Y2	Emir x A17/1	3	IL_46	270193	IL	2HL	2HS small, 2HL, 5HL	chr2H_1,0,2000000;chr2H_1,566000000,579000000;chr5H_1,451000000,454000000;
PRJEB7908	NGB22886	181P179/M1	304R2	Emir x A17/1	3	IL_48	270195	IL	2HL	2HL	chr2H_1,571000000,580000000;
PRJEB7908	NGB22862	181P180/M1	304P1	Emir x A17/1	3	IL_49	270196	IL	1HL, 6HL	1HL small, 6HL small	chr1H_1,451000000,454000000;chr6H_1,437000000,441000000;
PRJEB7908	NGB22963	181P189/M3	302T1	Emir x A17/1	3	IL_50	270197	IL	6HL	6HL small	chr6H_1,437000000,441000000;
PRJEB7908	NGB22887	181P192/M5	304T4	Emir x A17/1	3	IL_51	270198	IL	2HL	2HL small	chr2H_1,574000000,580000000;
PRJEB7908	NGB22994	181P208/M5/M1/M3	344N6	Emir x A17/1	3	IL_52	270199	IL	7HL?	7HL	chr7H_1,538000000,551000000;
PRJEB7908	NGB22888	181P210/M1	307L1	Emir x A17/1	3	IL_53	270201	IL	2HL	2HL	chr2H_1,562000000,580000000;
PRJEB7908	NGB22945	181P216/1/1/M1/M1		Emir x A17/1	3	IL_54	270202	IL	4HS	4HS	chr4H_1,0,8000000;
PRJEB7908	NGB22951	181P221/M4/M3/M2	335Z6	Emir x A17/1	3	IL_55	270203	IL	5HL	5HL	chr5H_1,514000000,518000000;
PRJEB7908	NGB22889	181P222/M3/M2/M1	335W5	Emir x A17/1	3	IL_56	270205	IL	2HL	2HL	chr2H_1,568000000,580000000;
PRJEB7908	NGB22890	181P223/M1/M2		Emir x A17/1	3	IL_57	270207	IL	2HL	2HL	chr2H_1,578000000,580000000;
PRJEB7908	NGB22948	181P233	261B1	Emir x A17/1	3	IL_58	270208	IL	4HS	4HS	chr4H_1,0,12000000;
PRJEB7908	NGB22903	181P236/M1	305H2	Emir x A17/1	3	IL_59	270209	IL	2HL	2HL	chr2H_1,542000000,569000000;
PRJEB7908	NGB22861	181P237/7/M7	264W1	Emir x A17/1	3	IL_60	270210	IL	1HL	1HL small, 7HS small	chr1H_1,452000000,454000000;chr7H_1,4000000,7000000;
PRJEB7908	NGB22964	181P238/M3	302R1	Emir x A17/1	3	IL_61	270212	IL	6HL	6HL small	chr6H_1,438000000,441000000;
PRJEB7908	NGB22891	181P239/M1/M3	337D4	Emir x A17/1	3	IL_62	270213	IL	2HL	2HL	chr2H_1,566000000,580000000;
PRJEB7908	NGB22996	181P242/M5	315A1/IPK2	Emir x A17/1	3	IL_63	270214	IL	1HL	1HL	chr1H_1,421000000,454000000;
PRJEB7908	NGB22870	181P246/M1/M1	358T1	Emir x A17/1	3	IL_64	270215	IL	1HS, 4HL	1HS, 3HS small, 4HL	chr1H_1,0,9000000;chr3H_1,0,3000000;chr4H_1,483000000,491000000;
PRJEB7908	NGB22974	181P255/M3/M1	315T3	Emir x A17/1	3	IL_65	270216	IL	6HS	6HS	chr6H_1,2000000,11000000;
PRJEB7908	NGB22965	181P262/M1	309T1	Emir x A17/1	3	IL_66	270217	IL	6HL	2HL small, 6HL small	chr6H_1,440000000,441000000;
PRJEB7908	NGB22892	181P264/M5/1/M3	322M3	Emir x A17/1	3	IL_67	270218	IL	2HL	2HL, 3HL	chr2H_1,574000000,580000000;chr3H_1,548000000,550000000;
PRJEB7908	NGB22970	181P267/M2/M1/M2/1/1		Emir x A17/1	3	IL_68	270219	IL	6HL (het)	6HL (het)	chr6H_1,433000000,441000000;
PRJEB7908	NGB22975	181P275/M1	311M1	Emir x A17/1	3	IL_70	270220	IL	6HS	6HS	chr6H_1,2000000,10000000;
PRJEB7908	NGB22966	181P278/M2	313R1	Emir x A17/1	3	IL_71	270221	IL	6HL	6HL small	chr6H_1,437000000,441000000;
PRJEB7908	NGB22952	181P281/M5	266G3	Emir x A17/1	3	IL_72	270223	IL	5HL	5HL	chr5H_1,499000000,518000000;
PRJEB7908	NGB22871	181P287/M1/M4	329A1	Emir x A17/1	3	IL_73	270224	IL	1HS	1HS	chr1H_1,0,30000000;chr3H_1,539000000,540000000;
PRJEB7908	NGB22967	181P305/M3	326S3	Emir x A17/1	3	IL_74	270225	IL	6HL	6HL, small	chr6H_1,437000000,441000000;
PRJEB7908	NGB22907	181P44/1/1-5/M1/M1		Emir x A17/1	3	IL_75	270226	IL	2HL, 6HL	2HL, 6HL small	chr2H_1,557000000,580000000;chr6H_1,438000000,441000000;
PRJEB7908	NGB22946	181P82/M2	300E1	Emir x A17/1	3	IL_76	270227	IL	4HS	4HS	chr4H_1,0,12000000;
PRJEB7908	NGB22917	181P87/1/2/M1-3		Emir x A17/1	3	IL_77	270228	IL	2HS	2HS	chr2H_1,0,9000000;
PRJEB7908	NGB22864	181P92/1	219W1	Emir x A17/1	3	IL_78	270229	IL	1HL, 7HL	1HL, 7HL	chr1H_1,443000000,454000000;chr7H_1,538000000,551000000;
PRJEB7908	NGB22908	181P92/1/11/1/2/3		Emir x A17/1	3	IL_79	270230	IL	2HL, 7HL	2HL, 7HL	chr2H_1,560000000,580000000;chr7H_1,539000000,551000000;
PRJEB7908	NGB22993	181P92/1/6/1/4		Emir x A17/1	3	IL_80	270231	IL	7HL	1HL, 7HL	chr1H_1,443000000,454000000;chr7H_1,539000000,551000000;
PRJEB7908	NGB22918	181P94/1/3/1/1/1-2/1		Emir x A17/1	3	IL_81	270232	IL	2HS	2HS	chr2H_1,10000000,29000000;
PRJEB7908	NGB22884	181P96/2/7		Emir x A17/1	3	IL_82	270234	IL	2HL?	2HL	chr2H_1,566000000,580000000;
PRJEB7908	NGB23004	182Q14/3/2/1	268G1/IPK1	GP x A17/1	3	IL_83	270235	IL	3HL	3HL	chr3H_1,497000000,514000000;
PRJEB7908	NGB22893	182Q20/1/M1		GP x A17/1	3	IL_84	270236	IL	2HL	2HL	chr2H_1,525000000,580000000;
PRJEB7908	NGB22927	182Q30/M1	309B1	GP x A17/1	3	IL_85	270237	IL	3HS	3HS	chr3H_1,0,8000000;
PRJEB7908	NGB22858	200A12/8/2/M2		Emir x A17	4	IL_86	270238	IL	1HL	1HL	chr1H_1,442000000,454000000;	A17hap3
PRJEB7908	NGB22922	200A13/5/3/3		Emir x A17	4	IL_87	270239	IL	2HS?, 4HL	2HS, 4HL	chr2H_1,0,15000000;chr4H_1,470000000,491000000;	A17hap1; A17hap1
PRJEB7908	NGB22920	200A3/7/M1		Emir x A17	4	IL_88	270240	IL	2HS	2HS	chr2H_1,0,35000000;	A17hap2/A17hap4
PRJEB7908	NGB22872	200A7/1/4/M2/M2		Emir x A17	4	IL_90	270241	IL	1HS	1HS	chr1H_1,0,12000000;	A17hap1
PRJEB7908	NGB22953	203S1/9/1		Emir x A17	3	IL_91	270242	IL	5HL interstitial	5HL interstitial	chr5H_1,417000000,443000000;	A17hap1/A17hap3
PRJEB7908	NGB22894	203S11/M2	315J7	Emir x A17	3	IL_92	270243	IL	2HL	2HL	chr2H_1,541000000,580000000;	A17hap4
PRJEB7908	NGB22852	203S16/M2	328B2	Emir x A17	3	IL_93	270245	IL	1HL	1HL	chr1H_1,446000000,454000000;	A17hap1
PRJEB7908	NGB22976	203S4/M1	344S	Emir x A17	3	IL_94	270246	IL	6HS	5HL (het), 6HS	chr5H_1,456000000,466000000;chr6H_1,2000000,8000000;	A17hap3; A17hap4
PRJEB7908	NGB22895	211Q1/M1	310J1	Emir x (2920/4 x Tinos16/1)	3	IL_96	270329	IL	2HL	2HL	chr2H_1,524000000,579000000;
PRJEB7908	NGB22986	213G1/M1/M1		Emir x (2920/4 x Tinos 16/1)	3	IL_97	270248	IL	6HS, 7HL	6HS small, 7HS small, 7HL	chr6H_1,2000000,6000000;chr7H_1,0,3000000;chr7H_1,530000000,551000000;
PRJEB7908	NGB22999	213G2/2/1/IPK1		Emir x (2920/4 x Tinos16/1)	3	IL_98	270249	IL	2HS	2HS small	chr2H_1,0,4000000;
PRJEB7908	NGB22921	213G3/2/2/2/1		Emir x (2920/4 x Tinos16/1)	3	IL_99	270250	IL	2HS	2HS, 6HL small	chr2H_1,2000000,37000000;chr6H_1,439000000,441000000;
PRJEB7908	NGB22960	220A19/M3/M2	358C5	Morex x 2920/4	3	IL_101	270252	IL	5HS	5HS	chr5H_1,1000000,17000000;
PRJEB7908	NGB22971	220A23/M1/M1		Morex x 2920/4	3	IL_102	270253	IL	6HL (het)	6HL small (het)	chr6H_1,434000000,441000000;
PRJEB7908	NGB22866	220A40/M3/M1		Morex x 2920/4	3	IL_103	270254	IL	1HL (het)	1HL	chr1H_1,428000000,454000000;
PRJEB7908	NGB22947	220A45/M6		Morex x 2920/4	3	IL_104	270256	IL	4HS (het)	4HS (het)	chr4H_1,4000000,14000000;
PRJEB7908	NGB22853	228Q1/10/M1/M1		Morex x 2032	2	IL_105	270257	IL	1HL	1HL	chr1H_1,434000000,454000000;
PRJEB7908	NGB22935	228Q1/12/M4/M1		Morex x 2032	2	IL_106	270258	IL	4HL	4HL	chr4H_1,366000000,463000000;
PRJEB7908	NGB22928	228Q1/25/M1/M1		Morex x 2032	2	IL_107	270259	IL	3HS (het)	3HS (het)	chr3H_1,14000000,40000000;
PRJEB7908	NGB23002	228Q1/29/M2/M1/IPK4/2		Morex x 2032	2	IL_108	270260	IL	3HS	3HS small	chr3H_1,0,4000000;
PRJEB7908	NGB22854	228Q1/30/M1/M1		Morex x 2032	2	IL_109	270261	IL	1HL	1HL	chr1H_1,446000000,454000000;
PRJEB7908	NGB23000	228Q1/9/IPK2		Morex x 2032	2	IL_110	270262	IL	2HL	4HL small	chr4H_1,480000000,491000000;
PRJEB7908	NGB22906	102C2/13/2/15	238S1	Emir x 2032	2	IL_111	270263	IL	2HL, 3HS	2HL, 3HS	chr2H_1,535000000,580000000;chr3H_1,0,16000000;
PRJEB7908	NGB22929	230H13/17/M1/M1		Morex x 2032	2	IL_113	270264	IL	3HS	3HS	chr3H_1,0,18000000;
PRJEB7908	NGB22936	230H13/20/M1/M2		Morex x 2032	2	IL_114	270265	IL	4HL	4HL	chr4H_1,460000000,491000000;
PRJEB7908	NGB22977	230H13/22/M1/M1		Morex x 2032	2	IL_115	270267	IL	6HS	6HS	chr6H_1,4000000,46000000;
PRJEB7908	NGB22919	230H24/5/M1/M1		Morex x 2032	2	IL_116	270268	IL	2HS	2HS	chr2H_1,0,34000000;
PRJEB7908	NGB22867	230H25/35/M1/M1		Morex x 2032	2	IL_118	270269	IL	1HL, 4HL	1HL small	chr1H_1,450000000,454000000;
PRJEB7908	NGB22954	230S5/21/M3/M1		Morex x 2032	2	IL_119	270270	IL	5HL?	5HL	chr5H_1,505000000,518000000;
PRJEB7908	NGB22937	230S5/3/M3/M1		Morex x 2032	2	IL_120	270271	IL	4HL	4HL	chr4H_1,466000000,491000000;
PRJEB7908	NGB22944	230S5/4/M1/M1		Morex x 2032	2	IL_121	270272	IL	4HL	4HL	chr4H_1,423000000,491000000;
PRJEB7908	NGB22898	231D5/5/M1/M1	319B1	GP x 2032	2	IL_122	270273	IL	2HL	2HL	chr2H_1,568000000,580000000;
PRJEB7908	NGB22855	244H3/M1/M1/4		(Morex x Emir) x 2032	3	IL_123	270274	IL	1HL	1HL	chr1H_1,435000000,454000000;
PRJEB7908	NGB22856	251V58/M5/M1	315W3	Morex x 2032	3	IL_124	270275	IL	1HL	1HL	chr1H_1,435000000,454000000;
PRJEB7908	NGB22899	251V61/M2	266C1	Morex x 2032	3	IL_125	270276	IL	2HL	2HL	chr2H_1,532000000,580000000;
PRJEB7908	NGB22912	251V64/M2/M1		Morex x 2032	3	IL_126	270278	IL	2HL	2HL	chr2H_1,534000000,564000000;
PRJEB7908	NGB23001	308A5/10/10		102C2/27/1/4/1 x 102C2/33/1/1/1	IL x IL	IL_127	270279	IL	2HL, 4HL	2HL, 4HL	chr2H_1,563000000,568000000;chr4H_1,467000000,491000000;
PRJEB7908	NGB22938	30X2	53A8	GP x 2920/4	3	IL_128	270280	IL	4HL	4HL	chr4H_1,462000000,491000000;
PRJEB7908	NGB23006	34L72/9/1/3/2		Emir x 2032	3	IL_129	270281	IL	5HS	5HS small	chr5H_1,1000000,3000000;
PRJEB7908	NGB22978	36L24/2/7/M7/M1		Emir x 2920/4	3	IL_130	270282	IL	6HS	6HS small	chr6H_1,2000000,6000000;
PRJEB7908	NGB22943	36L31/7/2	216L1	Emir x 2920/4	3	IL_132	270284	IL	4HL	4HL	chr4H_1,486000000,491000000;
PRJEB7908	NGB22915	36L36/2/1/1		Emir x 2920/4	3	IL_133	270285	IL	2HS	2HL	chr2H_1,566000000,580000000;
PRJEB7908	NGB22979	36L46/M5	293C2	Emir x 2920/4	3	IL_134	270286	IL	6HS	6HS	chr6H_1,2000000,8000000;
PRJEB7908	NGB22939	36L5	129F2	Emir x 2920/4	3	IL_135	270287	IL	4HL	4HL	chr4H_1,485000000,491000000;
PRJEB7908	NGB22955	36L50/3/5/1-3/M1/M1	324F1	Emir x 2920/4	3	IL_136	270290	IL	5HL	5HL	chr5H_1,488000000,518000000;
PRJEB7908	NGB22989	36L51/1/2/M6		Emir x 2920/4	1	IL_137	270291	IL	6HS	negative	chr6H_1,2000000,5000000;
PRJEB7908	NGB22940	36L53/1/3-7/2/1		Emir x 2920/4	3	IL_138	270292	IL	4HL	4HL	chr4H_1,463000000,491000000;chr6H_1,69000000,70000000;
PRJEB7908	NGB22980	36L58/M6	290M4	Emir x 2920/4	3	IL_139	270293	IL	6HS	6HS	chr6H_1,2000000,17000000;
PRJEB7908	NGB22981	36L71/M2	293J8	Emir x 2920/4	3	IL_140	270294	IL	6HS	6HS	chr6H_1,2000000,41000000;
PRJEB7908	NGB22900	38P18/8/1/10		Emir x 2032	3	IL_141	270295	IL	2HL	2HL	chr2H_1,567000000,580000000;
PRJEB7908	NGB22956	38U16/2/8/4/8/9		GP x 2920/4	3	IL_142	270296	IL	5HL	5HL	chr5H_1,383000000,384000000;chr5H_1,433000000,499000000;
PRJEB7908	NGB22904	38U20/3/4/5/1		GP x 2920/4	3	IL_143	270297	IL	2HL	2HL	chr2H_1,566000000,580000000;
PRJEB7908	NGB22988	38U35/13	212Y1	GP x 2920/4	3	IL_144	270298	IL	6HS	6HS	chr6H_1,2000000,35000000;
PRJEB7908	NGB22987	38U4/1/3/10	218T1	GP x 2920/4	3	IL_145	270301	IL	6HS, 7HL	6HS, 7HL	chr6H_1,2000000,34000000;chr7H_1,541000000,548000000;
PRJEB7908	NGB22958	38U4/1/3/8/1		GP x 2920/4	3	IL_146	270302	IL	5HL, 6HS	5HL, 6HS	chr5H_1,478000000,518000000;chr6H_1,2000000,34000000;
PRJEB7908	NGB22982	38U4/1/3/9/3		GP x 2920/4	3	IL_147	270303	IL	6HS	6HS	chr6H_1,2000000,34000000;
PRJEB7908	NGB22941	60N3	185V3	Emir x 2032	3	IL_148	270304	IL	4HL	4HL	chr4H_1,476000000,491000000;
PRJEB7908	NGB22930	65F14/13/1		Emir x 2032	3	IL_150	270305	IL	4HL, 7HS	7HS (partly het)	chr7H_1,0,87000000;
PRJEB7908	NGB22901	65F17/3/2/M1		Emir x 2032	3	IL_151	270306	IL	2HL	2HL	chr2H_1,531000000,580000000;
PRJEB7908	NGB22942	65F3/2/1		Emir x 2032	3	IL_152	270307	IL	4HL	4HL	chr4H_1,449000000,491000000;
PRJEB7908	NGB22902	886Z3/1/10/1/2/1/5		Emir x 2920/4	3	IL_153	270308	IL	2HL	2HL small	chr2H_1,574000000,579000000;
PRJEB7908	NGB22875	926K2/11	170Q1	907-12 x (Emir x Crete6/2)	4	IL_155	270309	IL	2HL	2HL	chr2H_1,563000000,580000000;
PRJEB7908	NGB22968	36L30/12/10	244A2	Emir x 2920/4	3	IL_159	270314	IL	7HS	7HS	chr7H_1,0,20000000;
PRJEB7908	NGB22990	164M1/28/1/M2/M2/M1	322E1	Emir x 2920/4	3	IL_160	270316	IL	7HL	7HL	chr7H_1,531000000,551000000;
