# Supplementary material for: A haplotype-resolved pangenome of the barley wild relative Hordeum bulbosum
Source: Research Square preprint supplement (doi:10.21203/rs.3.rs-3916840/v1), 2024-02-08
Supplement: Supplementary file 8 [file 65fa3d282dc0eae01a9e003a.xlsx]

## Sheet: Feuil2
Annotated gene ID	Locus ID	annotation	NLR class	Chromosome	AGP Start	AGP End	orientation	comment on automatic annotation
HBULBOSUM.A17.PROJ.r1.3H_4G00621370	SFGH1	S-formylglutathione hydrolase-like	-	chr3H_4	473813779	473818704	+
HBULBOSUM.A17.PROJ.r1.3H_4G00621390	CNL1	NLR	CC-NBARC-LRR	chr3H_4	473854209	473858536	+
HBULBOSUM.A17.PROJ.r1.3H_4G00621400	?	Probable transposon	-	chr3H_4	473898157	473899054	-
-	pCNL2	partial NLR	CC-NBARC	chr3H_4	473905986	473908750	+
HBULBOSUM.A17.PROJ.r1.3H_4G00621410	pCNL3	partial NLR	CC-NBARC-LRR; stop codon in frame	chr3H_4	473954326	473957613	+	only two exons: no intron between exon 2 and 3
HBULBOSUM.A17.PROJ.r1.3H_4G00621420	pCNL4	partial NLR	CC-NBARC	chr3H_4	473986983	473988478	+	too short second exon
HBULBOSUM.A17.PROJ.r1.3H_4G00621380 exons 2-3	CNL5	NLR	CC-NBARC-LRR	chr3H_4	473998570	474002547	+	only exons 2-3 are correct, the rest is probable transposon
-	pCNL6	partial NLR	CC-NBARC-LRR; stop codon in frame	chr3H_4	474042702	474045598	+
HBULBOSUM.A17.PROJ.r1.3H_4G00621430	?	Probable transposon	-	chr3H_4	474048563	474051606	-
-	pCNL7	partial NLR	CC-NBARC-LRR; stop codon in frame	chr3H_4	474053681	474056774	-
-	pCNL8	partial NLR	CC-NBARC	chr3H_4	474134645	474145498	+
-	pCNL9	partial NLR	CC-NBARC	chr3H_4	474153029	474154942	+
HBULBOSUM.A17.PROJ.r1.3H_4G00621440	APGG1	Ankyrin repeat-containing protein	-	chr3H_4	474171722	474179102	-
-	pCNL10	partial NLR	NBARC	chr3H_4	474179350	474180006	-
HBULBOSUM.A17.PROJ.r1.3H_4G00621450 exons 1-2	CNL11	NLR	CC-NBARC-LRR	chr3H_4	474181989	474184784	+	Only first two exons are correct, the rest is probable transposon
-	CNL12	NLR	CC-NBARC-LRR	chr3H_4	474205542	474209131	+
-	pCNL13	partial NLR	CC-NBARC-LRR; stop codon in frame	chr3H_4	474224557	474228094	+
-	pCNL14	partial NLR	NBARC	chr3H_4	474247123	474247500	+
-	pCNL15	partial NLR	NBARC-LRR	chr3H_4	474293752	474295173	+
-	pCNL16	partial NLR	CC-NBARC	chr3H_4	474297935	474299956	+
HBULBOSUM.A17.PROJ.r1.3H_4G00621460	APGG2	Ankyrin repeat-containing protein	-	chr3H_4	474321555	474324442	-
