# Supplementary material for: A haplotype-resolved pangenome of the barley wild relative Hordeum bulbosum
Source: Research Square preprint supplement (doi:10.21203/rs.3.rs-3916840/v1), 2024-02-08
Supplement: Supplementary file 9 [file 74ac618b0705710d492d60d8.xlsx]

## Sheet: Sheet1
Number	Accession	Haplotype	Genome Size	Repeat content (%)	Gene Number (HC)	Busco (Poaceae)	LAI
1	FB19-011-3	Haplotype1	3586980674	0.862879	34486	0.974	20.82
2	FB19-011-3	Haplotype2	3624522832	0.863232	34434	0.975	20.27
3	FB20-029-7	Haplotype1	3572423470	0.868325	38204	0.962	19.43
4	FB20-029-7	Haplotype2	3593819306	0.868173	38549	0.959	19.84
5	FB20-005-1	Haplotype1	3477977465	0.866758	38139	0.948	19.26
6	FB20-005-1	Haplotype2	3427125603	0.86404	37909	0.941	20.39
7	PI365428	Haplotype1	3513640010	0.866497	37404	0.965	20.45
8	PI365428	Haplotype2	3446821499	0.867136	37146	0.959	19.64
9	FB19-001-1	Haplotype1	3068060110	0.860545	35395	0.866	19.82
10	FB19-001-1	Haplotype2	3402714116	0.871213	38096	0.944	19.25
11	FB19-001-1	Haplotype3	3162837301	0.858765	36566	0.898	21.61
12	FB19-001-1	Haplotype4	3001350438	0.861937	35070	0.858	18.99
13	FB19-028-3	Haplotype1	3264864197	0.857707	36252	0.91	20.5
14	FB19-028-3	Haplotype2	3497589766	0.860092	37916	0.947	20.52
15	FB19-028-3	Haplotype3	3219506034	0.869393	35795	0.89	18.36
16	FB19-028-3	Haplotype4	3316611088	0.858688	36519	0.917	20.4
17	GRA2256-1	Haplotype1	3172903516	0.86044	34430	0.908	20.62
18	GRA2256-1	Haplotype2	3180246206	0.872217	34184	0.903	19.53
19	GRA2256-1	Haplotype3	3341570161	0.871886	34274	0.927	20.96
20	GRA2256-1	Haplotype4	3384001874	0.876694	34862	0.936	19.41
21	A17	Haplotype1	3348901663	0.852708	35783	0.924	19.49
22	A17	Haplotype2	3221406363	0.859007	35479	0.911	19.38
23	A17	Haplotype3	3291128770	0.871179	35130	0.897	20.99
24	A17	Haplotype4	3317480583	0.862588	35849	0.931	18.82
25	A40	Haplotype1	3227766481	0.859014	35580	0.921	21.01
26	A40	Haplotype2	3313962504	0.870559	35877	0.937	19.16
27	A40	Haplotype3	3366135250	0.853553	35484	0.939	20.95
28	A40	Haplotype4	3294666600	0.859478	35624	0.933	21.05
29	A42	Haplotype1	3324723974	0.872192	35898	0.93	19.33
30	A42	Haplotype2	3217373132	0.870015	34811	0.904	21.05
31	A42	Haplotype3	3149031701	0.855845	34599	0.906	20.54
32	A42	Haplotype4	3239241621	0.871789	34704	0.908	20.23
