# Supplementary material for: A haplotype-resolved pangenome of the barley wild relative Hordeum bulbosum
Source: Research Square preprint supplement (doi:10.21203/rs.3.rs-3916840/v1), 2024-02-08
Supplement: Supplementary file 10 [file 7647fd92dcd82b0d7137b96a.xlsx]

## Sheet: SingleCellSeq
project	sample	library	BioSamplesID	Sample Name BioSamples
PRJEB65918	pollen_nucleiOR_1	SingleCellSeq	SAMEA114336141	pollen_nucleiOR_1
PRJEB65918	pollen_nucleiOR_2	SingleCellSeq	SAMEA114336142	pollen_nucleiOR_2
PRJEB65918	pollen_nucleiOR_3	SingleCellSeq	SAMEA114336143	pollen_nucleiOR_3
PRJEB65918	pollen_nucleiOR_4	SingleCellSeq	SAMEA114336144	pollen_nucleiOR_4
PRJEB65918	pollen_nucleiOR_5	SingleCellSeq	SAMEA114336145	pollen_nucleiOR_5
PRJEB65918	pollen_nucleiOR_6	SingleCellSeq	SAMEA114336146	pollen_nucleiOR_6
PRJEB65918	pollen_nucleiOR_7	SingleCellSeq	SAMEA114336147	pollen_nucleiOR_7
PRJEB65918	pollen_nucleiOR_8	SingleCellSeq	SAMEA114336148	pollen_nucleiOR_8
PRJEB65918	pollen_nucleiOR_9	SingleCellSeq	SAMEA114336149	pollen_nucleiOR_9
PRJEB65918	pollen_nucleiOR_10	SingleCellSeq	SAMEA114336150	pollen_nucleiOR_10
PRJEB65918	pollen_nucleiOR_11	SingleCellSeq	SAMEA114336151	pollen_nucleiOR_11
PRJEB65918	pollen_nucleiOR_12	SingleCellSeq	SAMEA114336152	pollen_nucleiOR_12
PRJEB65918	pollen_nucleiOR_13	SingleCellSeq	SAMEA114336153	pollen_nucleiOR_13
PRJEB65918	pollen_nucleiOR_14	SingleCellSeq	SAMEA114336154	pollen_nucleiOR_14
PRJEB65918	pollen_nucleiOR_15	SingleCellSeq	SAMEA114336155	pollen_nucleiOR_15
PRJEB65918	pollen_nucleiOR_16	SingleCellSeq	SAMEA114336156	pollen_nucleiOR_16
PRJEB65918	pollen_nucleiOR_17	SingleCellSeq	SAMEA114336157	pollen_nucleiOR_17
PRJEB65918	pollen_nucleiOR_18	SingleCellSeq	SAMEA114336158	pollen_nucleiOR_18
PRJEB65918	pollen_nucleiOR_19	SingleCellSeq	SAMEA114336159	pollen_nucleiOR_19
PRJEB65918	pollen_nucleiOR_20	SingleCellSeq	SAMEA114336160	pollen_nucleiOR_20
PRJEB65918	pollen_nucleiOR_21	SingleCellSeq	SAMEA114336161	pollen_nucleiOR_21
PRJEB65918	pollen_nucleiOR_22	SingleCellSeq	SAMEA114336162	pollen_nucleiOR_22
PRJEB65918	pollen_nucleiOR_23	SingleCellSeq	SAMEA114336163	pollen_nucleiOR_23
PRJEB65918	pollen_nucleiOR_24	SingleCellSeq	SAMEA114336164	pollen_nucleiOR_24
PRJEB65918	pollen_nucleiOR_25	SingleCellSeq	SAMEA114336165	pollen_nucleiOR_25
PRJEB65918	pollen_nucleiOR_26	SingleCellSeq	SAMEA114336166	pollen_nucleiOR_26
PRJEB65918	pollen_nucleiOR_27	SingleCellSeq	SAMEA114336167	pollen_nucleiOR_27
PRJEB65918	pollen_nucleiOR_28	SingleCellSeq	SAMEA114336168	pollen_nucleiOR_28
PRJEB65918	pollen_nucleiOR_29	SingleCellSeq	SAMEA114336169	pollen_nucleiOR_29
PRJEB65918	pollen_nucleiOR_30	SingleCellSeq	SAMEA114336170	pollen_nucleiOR_30
PRJEB65918	pollen_nucleiOR_31	SingleCellSeq	SAMEA114336171	pollen_nucleiOR_31
PRJEB65918	pollen_nucleiOR_32	SingleCellSeq	SAMEA114336172	pollen_nucleiOR_32
PRJEB65918	pollen_nucleiOR_33	SingleCellSeq	SAMEA114336173	pollen_nucleiOR_33
PRJEB65918	pollen_nucleiOR_34	SingleCellSeq	SAMEA114336174	pollen_nucleiOR_34
PRJEB65918	pollen_nucleiOR_35	SingleCellSeq	SAMEA114336175	pollen_nucleiOR_35
PRJEB65918	pollen_nucleiOR_36	SingleCellSeq	SAMEA114336176	pollen_nucleiOR_36
PRJEB65918	pollen_nucleiOR_37	SingleCellSeq	SAMEA114336177	pollen_nucleiOR_37
PRJEB65918	pollen_nucleiOR_38	SingleCellSeq	SAMEA114336178	pollen_nucleiOR_38
PRJEB65918	pollen_nucleiOR_39	SingleCellSeq	SAMEA114336179	pollen_nucleiOR_39
PRJEB65918	pollen_nucleiOR_40	SingleCellSeq	SAMEA114336180	pollen_nucleiOR_40
PRJEB65918	pollen_nucleiOR_41	SingleCellSeq	SAMEA114336181	pollen_nucleiOR_41
PRJEB65918	pollen_nucleiOR_42	SingleCellSeq	SAMEA114336182	pollen_nucleiOR_42
PRJEB65918	pollen_nucleiOR_43	SingleCellSeq	SAMEA114336183	pollen_nucleiOR_43
PRJEB65918	pollen_nucleiOR_44	SingleCellSeq	SAMEA114336184	pollen_nucleiOR_44
PRJEB65918	pollen_nucleiOR_45	SingleCellSeq	SAMEA114336185	pollen_nucleiOR_45
PRJEB65918	pollen_nucleiOR_46	SingleCellSeq	SAMEA114336186	pollen_nucleiOR_46
PRJEB65918	pollen_nucleiOR_47	SingleCellSeq	SAMEA114336187	pollen_nucleiOR_47
PRJEB65918	pollen_nucleiOR_48	SingleCellSeq	SAMEA114336188	pollen_nucleiOR_48
PRJEB65918	pollen_nucleiOR_49	SingleCellSeq	SAMEA114336189	pollen_nucleiOR_49
PRJEB65918	pollen_nucleiOR_50	SingleCellSeq	SAMEA114336190	pollen_nucleiOR_50
PRJEB65918	pollen_nucleiOR_51	SingleCellSeq	SAMEA114336191	pollen_nucleiOR_51
PRJEB65918	pollen_nucleiOR_52	SingleCellSeq	SAMEA114336192	pollen_nucleiOR_52
PRJEB65918	pollen_nucleiOR_53	SingleCellSeq	SAMEA114336193	pollen_nucleiOR_53
PRJEB65918	pollen_nucleiOR_54	SingleCellSeq	SAMEA114336194	pollen_nucleiOR_54
PRJEB65918	pollen_nucleiOR_55	SingleCellSeq	SAMEA114336195	pollen_nucleiOR_55
PRJEB65918	pollen_nucleiOR_56	SingleCellSeq	SAMEA114336196	pollen_nucleiOR_56
PRJEB65918	pollen_nucleiOR_57	SingleCellSeq	SAMEA114336197	pollen_nucleiOR_57
PRJEB65918	pollen_nucleiOR_58	SingleCellSeq	SAMEA114336198	pollen_nucleiOR_58
PRJEB65918	pollen_nucleiOR_59	SingleCellSeq	SAMEA114336199	pollen_nucleiOR_59
PRJEB65918	pollen_nucleiOR_60	SingleCellSeq	SAMEA114336200	pollen_nucleiOR_60
PRJEB65918	pollen_nucleiOR_61	SingleCellSeq	SAMEA114336201	pollen_nucleiOR_61
PRJEB65918	pollen_nucleiOR_62	SingleCellSeq	SAMEA114336202	pollen_nucleiOR_62
PRJEB65918	pollen_nucleiOR_63	SingleCellSeq	SAMEA114336203	pollen_nucleiOR_63
PRJEB65918	pollen_nucleiOR_64	SingleCellSeq	SAMEA114336204	pollen_nucleiOR_64
PRJEB65918	pollen_nucleiOR_65	SingleCellSeq	SAMEA114336205	pollen_nucleiOR_65
PRJEB65918	pollen_nucleiOR_66	SingleCellSeq	SAMEA114336206	pollen_nucleiOR_66
PRJEB65918	pollen_nucleiOR_67	SingleCellSeq	SAMEA114336207	pollen_nucleiOR_67
PRJEB65918	pollen_nucleiOR_68	SingleCellSeq	SAMEA114336208	pollen_nucleiOR_68
PRJEB65918	pollen_nucleiOR_69	SingleCellSeq	SAMEA114336209	pollen_nucleiOR_69
PRJEB65918	pollen_nucleiOR_70	SingleCellSeq	SAMEA114336210	pollen_nucleiOR_70
PRJEB65918	pollen_nucleiOR_71	SingleCellSeq	SAMEA114336211	pollen_nucleiOR_71
PRJEB65918	pollen_nucleiOR_72	SingleCellSeq	SAMEA114336212	pollen_nucleiOR_72
PRJEB65918	pollen_nucleiOR_73	SingleCellSeq	SAMEA114336213	pollen_nucleiOR_73
PRJEB65918	pollen_nucleiOR_74	SingleCellSeq	SAMEA114336214	pollen_nucleiOR_74
PRJEB65918	pollen_nucleiOR_75	SingleCellSeq	SAMEA114336215	pollen_nucleiOR_75
PRJEB65918	pollen_nucleiOR_76	SingleCellSeq	SAMEA114336216	pollen_nucleiOR_76
PRJEB65918	pollen_nucleiOR_77	SingleCellSeq	SAMEA114336217	pollen_nucleiOR_77
PRJEB65918	pollen_nucleiOR_78	SingleCellSeq	SAMEA114336218	pollen_nucleiOR_78
PRJEB65918	pollen_nucleiOR_79	SingleCellSeq	SAMEA114336219	pollen_nucleiOR_79
PRJEB65918	pollen_nucleiOR_80	SingleCellSeq	SAMEA114336220	pollen_nucleiOR_80
PRJEB65918	pollen_nucleiOR_81	SingleCellSeq	SAMEA114336221	pollen_nucleiOR_81
PRJEB65918	pollen_nucleiOR_82	SingleCellSeq	SAMEA114336222	pollen_nucleiOR_82
PRJEB65918	pollen_nucleiOR_83	SingleCellSeq	SAMEA114336223	pollen_nucleiOR_83
PRJEB65918	pollen_nucleiOR_84	SingleCellSeq	SAMEA114336224	pollen_nucleiOR_84
PRJEB65918	pollen_nucleiOR_85	SingleCellSeq	SAMEA114336225	pollen_nucleiOR_85
PRJEB65918	pollen_nucleiOR_86	SingleCellSeq	SAMEA114336226	pollen_nucleiOR_86
PRJEB65918	pollen_nucleiOR_87	SingleCellSeq	SAMEA114336227	pollen_nucleiOR_87
PRJEB65918	pollen_nucleiOR_88	SingleCellSeq	SAMEA114336228	pollen_nucleiOR_88
PRJEB65918	pollen_nucleiOR_89	SingleCellSeq	SAMEA114336229	pollen_nucleiOR_89
PRJEB65918	pollen_nucleiOR_90	SingleCellSeq	SAMEA114336230	pollen_nucleiOR_90
PRJEB65918	pollen_nucleiOR_91	SingleCellSeq	SAMEA114336231	pollen_nucleiOR_91
PRJEB65918	pollen_nucleiOR_92	SingleCellSeq	SAMEA114336232	pollen_nucleiOR_92
PRJEB65918	pollen_nucleiOR_93	SingleCellSeq	SAMEA114336233	pollen_nucleiOR_93
PRJEB65918	pollen_nucleiOR_94	SingleCellSeq	SAMEA114336234	pollen_nucleiOR_94
PRJEB65918	pollen_nucleiOR_95	SingleCellSeq	SAMEA114336235	pollen_nucleiOR_95
PRJEB65918	pollen_nucleiOR_96	SingleCellSeq	SAMEA114336236	pollen_nucleiOR_96
