# Supplementary material for: A haplotype-resolved pangenome of the barley wild relative Hordeum bulbosum
Source: Research Square preprint supplement (doi:10.21203/rs.3.rs-3916840/v1), 2024-02-08
Supplement: Supplementary file 11 [file 93a95dba198f35cda3576565.xlsx]

## Sheet: GBS
Sample	Species	Library Type	Sample Name BioSamples	BioSamplesID
FB18_016_1_GRE_Kea_4x	Hordeum bulbosum	GBS	2417745_FB18_016_1_GRE_Kea_4x	SAMEA114314351
FB18_017_1_GRE_Kea_4x	Hordeum bulbosum	GBS	2417746_FB18_017_1_GRE_Kea_4x	SAMEA114314352
FB19_001_1_GRE_Pelo_4x	Hordeum bulbosum	GBS	2417747_FB19_001_1_GRE_Pelo_4x	SAMEA114314353
FB19_001_5_GRE_Pelo_4x	Hordeum bulbosum	GBS	2417748_FB19_001_5_GRE_Pelo_4x	SAMEA114314354
FB19_006_1_GRE_Pelo_Kerasia	Hordeum bulbosum	GBS	2417749_FB19_006_1_GRE_Pelo_Kerasia	SAMEA114314355
FB19_006_5_GRE_Pelo_Kerasia	Hordeum bulbosum	GBS	2417750_FB19_006_5_GRE_Pelo_Kerasia	SAMEA114314356
FB19_008_1_GRE_Pelo_Egio	Hordeum bulbosum	GBS	2417751_FB19_008_1_GRE_Pelo_Egio	SAMEA114314357
FB19_009_1_GRE_WGr_Amfilochia	Hordeum bulbosum	GBS	2417752_FB19_009_1_GRE_WGr_Amfilochia	SAMEA114314358
FB19_009_4_GRE_WGr_Amfilochia	Hordeum bulbosum	GBS	2417753_FB19_009_4_GRE_WGr_Amfilochia	SAMEA114314359
FB19_009_5_GRE_WGr_Amfilochia	Hordeum bulbosum	GBS	2417754_FB19_009_5_GRE_WGr_Amfilochia	SAMEA114314360
FB19_010_1_GRE_WGr_Preveza	Hordeum bulbosum	GBS	2417755_FB19_010_1_GRE_WGr_Preveza	SAMEA114314361
FB19_010_3_GRE_WGr_Preveza	Hordeum bulbosum	GBS	2417756_FB19_010_3_GRE_WGr_Preveza	SAMEA114314362
FB19_010_4_GRE_WGr_Preveza	Hordeum bulbosum	GBS	2417757_FB19_010_4_GRE_WGr_Preveza	SAMEA114314363
FB19_010_5_GRE_WGr_Preveza	Hordeum bulbosum	GBS	2417758_FB19_010_5_GRE_WGr_Preveza	SAMEA114314364
FB19_010_7_GRE_WGr_Preveza	Hordeum bulbosum	GBS	2417759_FB19_010_7_GRE_WGr_Preveza	SAMEA114314365
FB19_011_1_GRE_WGr_Andirrio	Hordeum bulbosum	GBS	2417760_FB19_011_1_GRE_WGr_Andirrio	SAMEA114314366
FB19_011_5_GRE_WGr_Andirrio	Hordeum bulbosum	GBS	2417762_FB19_011_5_GRE_WGr_Andirrio	SAMEA114314367
FB19_011_8_GRE_WGr_Andirrio	Hordeum bulbosum	GBS	2417763_FB19_011_8_GRE_WGr_Andirrio	SAMEA114314368
FB19_012_1_GRE_CGr_Itea_4x	Hordeum bulbosum	GBS	2417764_FB19_012_1_GRE_CGr_Itea_4x	SAMEA114314369
FB19_012_3_GRE_CGr_Itea_4x	Hordeum bulbosum	GBS	2417765_FB19_012_3_GRE_CGr_Itea_4x	SAMEA114314370
FB19_016_1_GRE_CGr_Schimatari_4x	Hordeum bulbosum	GBS	2417766_FB19_016_1_GRE_CGr_Schimatari_4x	SAMEA114314371
FB19_018_1a_GRE_Evia_4x	Hordeum bulbosum	GBS	2417767_FB19_018_1a_GRE_Evia_4x	SAMEA114314372
FB19_018_1c_GRE_Evia_4x	Hordeum bulbosum	GBS	2417768_FB19_018_1c_GRE_Evia_4x	SAMEA114314373
FB19_018_1e_GRE_Evia_4x	Hordeum bulbosum	GBS	2417769_FB19_018_1e_GRE_Evia_4x	SAMEA114314374
FB19_022_1_GRE_Thessaly_4x	Hordeum bulbosum	GBS	2417770_FB19_022_1_GRE_Thessaly_4x	SAMEA114314375
FB19_022_5_GRE_Thessaly_4x	Hordeum bulbosum	GBS	2417771_FB19_022_5_GRE_Thessaly_4x	SAMEA114314376
FB19_025_1_GRE_Thessaly_4x	Hordeum bulbosum	GBS	2417772_FB19_025_1_GRE_Thessaly_4x	SAMEA114314377
FB19_025_2_GRE_Thessaly_4x	Hordeum bulbosum	GBS	2417773_FB19_025_2_GRE_Thessaly_4x	SAMEA114314378
FB19_027A_1_GRE_Thessaly_4x	Hordeum bulbosum	GBS	2417774_FB19_027A_1_GRE_Thessaly_4x	SAMEA114314379
FB19_027A_3_GRE_Thessaly_4x	Hordeum bulbosum	GBS	2417775_FB19_027A_3_GRE_Thessaly_4x	SAMEA114314380
FB19_027A_5_GRE_Thessaly_4x	Hordeum bulbosum	GBS	2417776_FB19_027A_5_GRE_Thessaly_4x	SAMEA114314381
FB19_028_1_GRE_Pindos_4x	Hordeum bulbosum	GBS	2417777_FB19_028_1_GRE_Pindos_4x	SAMEA114314382
FB19_028_2_GRE_Pindos_4x	Hordeum bulbosum	GBS	2417778_FB19_028_2_GRE_Pindos_4x	SAMEA114314383
FB19_028_3_GRE_Pindos_4x	Hordeum bulbosum	GBS	2417779_FB19_028_3_GRE_Pindos_4x	SAMEA114314384
FB19_030_1_GRE_Pindos_4x	Hordeum bulbosum	GBS	2417780_FB19_030_1_GRE_Pindos_4x	SAMEA114314385
FB19_030_2_GRE_Pindos_4x	Hordeum bulbosum	GBS	2417781_FB19_030_2_GRE_Pindos_4x	SAMEA114314386
FB19_030_3_GRE_Pindos_4x	Hordeum bulbosum	GBS	2417782_FB19_030_3_GRE_Pindos_4x	SAMEA114314387
FB19_031_1_GRE_WMakedonia_4x	Hordeum bulbosum	GBS	2417783_FB19_031_1_GRE_WMakedonia_4x	SAMEA114314388
FB19_033_1_GRE_Thessaly_4x	Hordeum bulbosum	GBS	2417784_FB19_033_1_GRE_Thessaly_4x	SAMEA114314389
FB19_033_6_GRE_Thessaly_4x	Hordeum bulbosum	GBS	2417785_FB19_033_6_GRE_Thessaly_4x	SAMEA114314390
FB19_039_1_GRE_Attica_4x	Hordeum bulbosum	GBS	2417786_FB19_039_1_GRE_Attica_4x	SAMEA114314391
FB19_042_1_GRE_Pelo_Mani	Hordeum bulbosum	GBS	2417787_FB19_042_1_GRE_Pelo_Mani	SAMEA114314392
FB19_042_3_GRE_Pelo_Mani	Hordeum bulbosum	GBS	2417788_FB19_042_3_GRE_Pelo_Mani	SAMEA114314393
FB19_043_1_GRE_Pelo_Lakonia	Hordeum bulbosum	GBS	2417789_FB19_043_1_GRE_Pelo_Lakonia	SAMEA114314394
FB19_044_1_GRE_Pelo_Messenia	Hordeum bulbosum	GBS	2417790_FB19_044_1_GRE_Pelo_Messenia	SAMEA114314395
FB19_045_3_GRE_Pelo_Messenia	Hordeum bulbosum	GBS	2417791_FB19_045_3_GRE_Pelo_Messenia	SAMEA114314396
FB19_045_5_GRE_Pelo_Messenia	Hordeum bulbosum	GBS	2417792_FB19_045_5_GRE_Pelo_Messenia	SAMEA114314397
FB19_046_1_GRE_Pelo_Messenia	Hordeum bulbosum	GBS	2417793_FB19_046_1_GRE_Pelo_Messenia	SAMEA114314398
FB19_046_4_GRE_Pelo_Messenia	Hordeum bulbosum	GBS	2417794_FB19_046_4_GRE_Pelo_Messenia	SAMEA114314399
FB19_046_5_GRE_Pelo_Messenia	Hordeum bulbosum	GBS	2417795_FB19_046_5_GRE_Pelo_Messenia	SAMEA114314400
FB19_047_2_GRE_Pelo_Elis	Hordeum bulbosum	GBS	2417796_FB19_047_2_GRE_Pelo_Elis	SAMEA114314401
FB19_047_3_GRE_Pelo_Elis	Hordeum bulbosum	GBS	2417797_FB19_047_3_GRE_Pelo_Elis	SAMEA114314402
FB19_047_5_GRE_Pelo_Elis	Hordeum bulbosum	GBS	2417798_FB19_047_5_GRE_Pelo_Elis	SAMEA114314403
FB19_048_1_GRE_Naxos_4x	Hordeum bulbosum	GBS	2417799_FB19_048_1_GRE_Naxos_4x	SAMEA114314404
FB19_048_6_GRE_Naxos_4x	Hordeum bulbosum	GBS	2417800_FB19_048_6_GRE_Naxos_4x	SAMEA114314405
FB19_061B_1_GRE_Pelo_Angelokastro_4x	Hordeum bulbosum	GBS	2417801_FB19_061B_1_GRE_Pelo_Angelokastro_4x	SAMEA114314406
FB19_065_1_GRE_Methana_4x	Hordeum bulbosum	GBS	2417802_FB19_065_1_GRE_Methana_4x	SAMEA114314407
FB19_065_2_GRE_Methana_4x	Hordeum bulbosum	GBS	2417803_FB19_065_2_GRE_Methana_4x	SAMEA114314408
GRA2718_1_GRE_Crete_4x	Hordeum bulbosum	GBS	2417804_GRA2718_1_GRE_Crete_4x	SAMEA114314409
GRA2718_2_GRE_Crete_4x	Hordeum bulbosum	GBS	2417805_GRA2718_2_GRE_Crete_4x	SAMEA114314410
FB19_037_9a_ALB_FanarPilake	Hordeum bulbosum	GBS	2417806_FB19_037_9a_ALB_FanarPilake	SAMEA114314411
FB14_055_1_ITA_Camp_Salerno	Hordeum bulbosum	GBS	2417807_FB14_055_1_ITA_Camp_Salerno	SAMEA114314412
FB14_055_6_ITA_Camp_Salerno	Hordeum bulbosum	GBS	2417808_FB14_055_6_ITA_Camp_Salerno	SAMEA114314413
FB14_055_7_ITA_Camp_Salerno	Hordeum bulbosum	GBS	2417809_FB14_055_7_ITA_Camp_Salerno	SAMEA114314414
FB18_011_1_ITA_Sard_Sassari	Hordeum bulbosum	GBS	2417810_FB18_011_1_ITA_Sard_Sassari	SAMEA114314415
FB18_011_3_ITA_Sard_Sassari	Hordeum bulbosum	GBS	2417811_FB18_011_3_ITA_Sard_Sassari	SAMEA114314416
FB18_011_6_ITA_Sard_Sassari	Hordeum bulbosum	GBS	2417812_FB18_011_6_ITA_Sard_Sassari	SAMEA114314417
FB18_011_12_ITA_Sard_Sassari	Hordeum bulbosum	GBS	2417813_FB18_011_12_ITA_Sard_Sassari	SAMEA114314418
FB18_012_1_ITA_Sard_Ozieri	Hordeum bulbosum	GBS	2417814_FB18_012_1_ITA_Sard_Ozieri	SAMEA114314419
FB18_012_3_ITA_Sard_Ozieri	Hordeum bulbosum	GBS	2417815_FB18_012_3_ITA_Sard_Ozieri	SAMEA114314420
FB18_012_5_ITA_Sard_Ozieri	Hordeum bulbosum	GBS	2417816_FB18_012_5_ITA_Sard_Ozieri	SAMEA114314421
FB18_012_6_ITA_Sard_Ozieri	Hordeum bulbosum	GBS	2417817_FB18_012_6_ITA_Sard_Ozieri	SAMEA114314422
FB18_012_7_ITA_Sard_Ozieri	Hordeum bulbosum	GBS	2417818_FB18_012_7_ITA_Sard_Ozieri	SAMEA114314423
FB18_013_1_ITA_Sard_Ozieri	Hordeum bulbosum	GBS	2417819_FB18_013_1_ITA_Sard_Ozieri	SAMEA114314424
FB18_013_3_ITA_Sard_Ozieri	Hordeum bulbosum	GBS	2417820_FB18_013_3_ITA_Sard_Ozieri	SAMEA114314425
FB18_013_5_ITA_Sard_Ozieri	Hordeum bulbosum	GBS	2417821_FB18_013_5_ITA_Sard_Ozieri	SAMEA114314426
FB18_013_7_ITA_Sard_Ozieri	Hordeum bulbosum	GBS	2417822_FB18_013_7_ITA_Sard_Ozieri	SAMEA114314427
FB18_013_9_ITA_Sard_Ozieri	Hordeum bulbosum	GBS	2417823_FB18_013_9_ITA_Sard_Ozieri	SAMEA114314428
FB18_014_1_ITA_Sard_Macomer	Hordeum bulbosum	GBS	2417824_FB18_014_1_ITA_Sard_Macomer	SAMEA114314429
FB18_014_3_ITA_Sard_Macomer	Hordeum bulbosum	GBS	2417825_FB18_014_3_ITA_Sard_Macomer	SAMEA114314430
FB18_014_5_ITA_Sard_Macomer	Hordeum bulbosum	GBS	2417826_FB18_014_5_ITA_Sard_Macomer	SAMEA114314431
FB18_014_6_ITA_Sard_Macomer	Hordeum bulbosum	GBS	2417827_FB18_014_6_ITA_Sard_Macomer	SAMEA114314432
FB18_014_8_ITA_Sard_Macomer	Hordeum bulbosum	GBS	2417828_FB18_014_8_ITA_Sard_Macomer	SAMEA114314433
FB12_007A_1_ESP_And_Tarifa	Hordeum bulbosum	GBS	2417829_FB12_007A_1_ESP_And_Tarifa	SAMEA114314434
FB12_007A_2_ESP_And_Tarifa	Hordeum bulbosum	GBS	2417830_FB12_007A_2_ESP_And_Tarifa	SAMEA114314435
FB12_007A_3_ESP_And_Tarifa	Hordeum bulbosum	GBS	2417831_FB12_007A_3_ESP_And_Tarifa	SAMEA114314436
FB12_007A_4_ESP_And_Tarifa	Hordeum bulbosum	GBS	2417832_FB12_007A_4_ESP_And_Tarifa	SAMEA114314437
FB12_007A_5_ESP_And_Tarifa	Hordeum bulbosum	GBS	2417833_FB12_007A_5_ESP_And_Tarifa	SAMEA114314438
FB12_011_3_ESP_And_Grazalema	Hordeum bulbosum	GBS	2417834_FB12_011_3_ESP_And_Grazalema	SAMEA114314439
FB12_011_4_ESP_And_Grazalema	Hordeum bulbosum	GBS	2417835_FB12_011_4_ESP_And_Grazalema	SAMEA114314440
FB12_011_5_ESP_And_Grazalema	Hordeum bulbosum	GBS	2417836_FB12_011_5_ESP_And_Grazalema	SAMEA114314441
FB18_009_1_ESP_And_FuenteObejuna	Hordeum bulbosum	GBS	2417837_FB18_009_1_ESP_And_FuenteObejuna	SAMEA114314442
FB18_009_3_ESP_And_FuenteObejuna	Hordeum bulbosum	GBS	2417838_FB18_009_3_ESP_And_FuenteObejuna	SAMEA114314443
FB20_001_1_ITA_Rome	Hordeum bulbosum	GBS	2417841_FB20_001_1_ITA_Rome	SAMEA114314444
FB20_001_3_ITA_Rome	Hordeum bulbosum	GBS	2417842_FB20_001_3_ITA_Rome	SAMEA114314445
FB20_001_4_ITA_Rome	Hordeum bulbosum	GBS	2417843_FB20_001_4_ITA_Rome	SAMEA114314446
FB20_001_5_ITA_Rome	Hordeum bulbosum	GBS	2417844_FB20_001_5_ITA_Rome	SAMEA114314447
FB20_003_1_ITA_Gargano	Hordeum bulbosum	GBS	2417845_FB20_003_1_ITA_Gargano	SAMEA114314448
FB20_003_3_ITA_Gargano	Hordeum bulbosum	GBS	2417846_FB20_003_3_ITA_Gargano	SAMEA114314449
FB20_003_4_ITA_Gargano	Hordeum bulbosum	GBS	2417847_FB20_003_4_ITA_Gargano	SAMEA114314450
FB20_003_5_ITA_Gargano	Hordeum bulbosum	GBS	2417848_FB20_003_5_ITA_Gargano	SAMEA114314451
FB20_003_6_ITA_Gargano	Hordeum bulbosum	GBS	2417849_FB20_003_6_ITA_Gargano	SAMEA114314452
FB20_004_1_ITA_Apu_CdM	Hordeum bulbosum	GBS	2417850_FB20_004_1_ITA_Apu_CdM	SAMEA114314453
FB20_004_7_ITA_Apu_CdM	Hordeum bulbosum	GBS	2417851_FB20_004_7_ITA_Apu_CdM	SAMEA114314454
FB20_005_1_ITA_Apu_Tarent	Hordeum bulbosum	GBS	2417852_FB20_005_1_ITA_Apu_Tarent	SAMEA114314455
FB20_005_3_ITA_Apu_Tarent	Hordeum bulbosum	GBS	2417853_FB20_005_3_ITA_Apu_Tarent	SAMEA114314456
FB20_006_3_ITA_Apu_Matera	Hordeum bulbosum	GBS	2417854_FB20_006_3_ITA_Apu_Matera	SAMEA114314457
FB20_008_1_ITA_Sic_Messina	Hordeum bulbosum	GBS	2417855_FB20_008_1_ITA_Sic_Messina	SAMEA114314458
FB20_008_4_ITA_Sic_Messina	Hordeum bulbosum	GBS	2417856_FB20_008_4_ITA_Sic_Messina	SAMEA114314459
FB20_008_5_ITA_Sic_Messina	Hordeum bulbosum	GBS	2417857_FB20_008_5_ITA_Sic_Messina	SAMEA114314460
FB20_008_6_ITA_Sic_Messina	Hordeum bulbosum	GBS	2417858_FB20_008_6_ITA_Sic_Messina	SAMEA114314461
FB20_008_7_ITA_Sic_Messina	Hordeum bulbosum	GBS	2417859_FB20_008_7_ITA_Sic_Messina	SAMEA114314462
FB20_008_8_ITA_Sic_Messina	Hordeum bulbosum	GBS	2417860_FB20_008_8_ITA_Sic_Messina	SAMEA114314463
FB20_009_1_ITA_Sic_Enna	Hordeum bulbosum	GBS	2417861_FB20_009_1_ITA_Sic_Enna	SAMEA114314464
FB20_009_3_ITA_Sic_Enna	Hordeum bulbosum	GBS	2417862_FB20_009_3_ITA_Sic_Enna	SAMEA114314465
FB20_009_4_ITA_Sic_Enna	Hordeum bulbosum	GBS	2417863_FB20_009_4_ITA_Sic_Enna	SAMEA114314466
FB20_009_5_ITA_Sic_Enna	Hordeum bulbosum	GBS	2417864_FB20_009_5_ITA_Sic_Enna	SAMEA114314467
FB20_009_6_ITA_Sic_Enna	Hordeum bulbosum	GBS	2417865_FB20_009_6_ITA_Sic_Enna	SAMEA114314468
FB20_010_1_ITA_Sic_Enna	Hordeum bulbosum	GBS	2417866_FB20_010_1_ITA_Sic_Enna	SAMEA114314469
FB20_010_3_ITA_Sic_Enna	Hordeum bulbosum	GBS	2417867_FB20_010_3_ITA_Sic_Enna	SAMEA114314470
FB20_010_7_ITA_Sic_Enna	Hordeum bulbosum	GBS	2417868_FB20_010_7_ITA_Sic_Enna	SAMEA114314471
FB20_010_8_ITA_Sic_Enna	Hordeum bulbosum	GBS	2417869_FB20_010_8_ITA_Sic_Enna	SAMEA114314472
FB20_011_5_ITA_Sic_Palermo	Hordeum bulbosum	GBS	2417870_FB20_011_5_ITA_Sic_Palermo	SAMEA114314473
FB20_011_6_ITA_Sic_Palermo	Hordeum bulbosum	GBS	2417871_FB20_011_6_ITA_Sic_Palermo	SAMEA114314474
FB20_011_9_ITA_Sic_Palermo	Hordeum bulbosum	GBS	2417872_FB20_011_9_ITA_Sic_Palermo	SAMEA114314475
FB20_012_1_ITA_Sic_Palermo	Hordeum bulbosum	GBS	2417873_FB20_012_1_ITA_Sic_Palermo	SAMEA114314476
FB20_012_2_ITA_Sic_Palermo	Hordeum bulbosum	GBS	2417874_FB20_012_2_ITA_Sic_Palermo	SAMEA114314477
FB20_013_1_ITA_Sic_Palermo	Hordeum bulbosum	GBS	2417875_FB20_013_1_ITA_Sic_Palermo	SAMEA114314478
FB20_013_3_ITA_Sic_Palermo	Hordeum bulbosum	GBS	2417876_FB20_013_3_ITA_Sic_Palermo	SAMEA114314479
FB20_013_4_ITA_Sic_Palermo	Hordeum bulbosum	GBS	2417877_FB20_013_4_ITA_Sic_Palermo	SAMEA114314480
FB20_014_1_ITA_Sic_Palermo	Hordeum bulbosum	GBS	2417878_FB20_014_1_ITA_Sic_Palermo	SAMEA114314481
FB20_014_3_ITA_Sic_Palermo	Hordeum bulbosum	GBS	2417879_FB20_014_3_ITA_Sic_Palermo	SAMEA114314482
FB20_015_1_ITA_Sic_Palermo	Hordeum bulbosum	GBS	2417880_FB20_015_1_ITA_Sic_Palermo	SAMEA114314483
FB20_015_4_ITA_Sic_Palermo	Hordeum bulbosum	GBS	2417881_FB20_015_4_ITA_Sic_Palermo	SAMEA114314484
FB20_016_3_ITA_Sic_Messina	Hordeum bulbosum	GBS	2417882_FB20_016_3_ITA_Sic_Messina	SAMEA114314485
FB20_018_1_ITA_Cal_Cosenza	Hordeum bulbosum	GBS	2417883_FB20_018_1_ITA_Cal_Cosenza	SAMEA114314486
FB20_018_3_ITA_Cal_Cosenza	Hordeum bulbosum	GBS	2417884_FB20_018_3_ITA_Cal_Cosenza	SAMEA114314487
FB20_019_1_ITA_Cal_Cosenza	Hordeum bulbosum	GBS	2417885_FB20_019_1_ITA_Cal_Cosenza	SAMEA114314488
FB20_019_3_ITA_Cal_Cosenza	Hordeum bulbosum	GBS	2417886_FB20_019_3_ITA_Cal_Cosenza	SAMEA114314489
FB20_019_4_ITA_Cal_Cosenza	Hordeum bulbosum	GBS	2417887_FB20_019_4_ITA_Cal_Cosenza	SAMEA114314490
FB20_019_6_ITA_Cal_Cosenza	Hordeum bulbosum	GBS	2417888_FB20_019_6_ITA_Cal_Cosenza	SAMEA114314491
FB20_019_8_ITA_Cal_Cosenza	Hordeum bulbosum	GBS	2417889_FB20_019_8_ITA_Cal_Cosenza	SAMEA114314492
FB20_021_1_ESP_Ext_Caceres	Hordeum bulbosum	GBS	2417890_FB20_021_1_ESP_Ext_Caceres	SAMEA114314493
FB20_021_3_ESP_Ext_Caceres	Hordeum bulbosum	GBS	2417891_FB20_021_3_ESP_Ext_Caceres	SAMEA114314494
FB20_021_4_ESP_Ext_Caceres	Hordeum bulbosum	GBS	2417892_FB20_021_4_ESP_Ext_Caceres	SAMEA114314495
FB20_021_5_ESP_Ext_Caceres	Hordeum bulbosum	GBS	2417893_FB20_021_5_ESP_Ext_Caceres	SAMEA114314496
FB20_021_6_ESP_Ext_Caceres	Hordeum bulbosum	GBS	2417894_FB20_021_6_ESP_Ext_Caceres	SAMEA114314497
FB20_022_2_ESP_Ext_Badajoz	Hordeum bulbosum	GBS	2417895_FB20_022_2_ESP_Ext_Badajoz	SAMEA114314498
FB20_022_3_ESP_Ext_Badajoz	Hordeum bulbosum	GBS	2417896_FB20_022_3_ESP_Ext_Badajoz	SAMEA114314499
FB20_022_4_ESP_Ext_Badajoz	Hordeum bulbosum	GBS	2417897_FB20_022_4_ESP_Ext_Badajoz	SAMEA114314500
FB20_022_5_ESP_Ext_Badajoz	Hordeum bulbosum	GBS	2417898_FB20_022_5_ESP_Ext_Badajoz	SAMEA114314501
FB20_023_1_ESP_Ext_Badajoz	Hordeum bulbosum	GBS	2417899_FB20_023_1_ESP_Ext_Badajoz	SAMEA114314502
FB20_023_3_ESP_Ext_Badajoz	Hordeum bulbosum	GBS	2417900_FB20_023_3_ESP_Ext_Badajoz	SAMEA114314503
FB20_023_4_ESP_Ext_Badajoz	Hordeum bulbosum	GBS	2417901_FB20_023_4_ESP_Ext_Badajoz	SAMEA114314504
FB20_024_1_ESP_Ext_Caceres	Hordeum bulbosum	GBS	2417902_FB20_024_1_ESP_Ext_Caceres	SAMEA114314505
FB20_024_2_ESP_Ext_Caceres	Hordeum bulbosum	GBS	2417903_FB20_024_2_ESP_Ext_Caceres	SAMEA114314506
FB20_024_3_ESP_Ext_Caceres	Hordeum bulbosum	GBS	2417904_FB20_024_3_ESP_Ext_Caceres	SAMEA114314507
FB20_024_4_ESP_Ext_Caceres	Hordeum bulbosum	GBS	2417905_FB20_024_4_ESP_Ext_Caceres	SAMEA114314508
FB20_025_1_ESP_And_Cordoba	Hordeum bulbosum	GBS	2417906_FB20_025_1_ESP_And_Cordoba	SAMEA114314509
FB20_025_3_ESP_And_Cordoba	Hordeum bulbosum	GBS	2417907_FB20_025_3_ESP_And_Cordoba	SAMEA114314510
FB20_026_1_ESP_And_Malaga	Hordeum bulbosum	GBS	2417908_FB20_026_1_ESP_And_Malaga	SAMEA114314511
FB20_026_3_ESP_And_Malaga	Hordeum bulbosum	GBS	2417909_FB20_026_3_ESP_And_Malaga	SAMEA114314512
FB20_026_5_ESP_And_Malaga	Hordeum bulbosum	GBS	2417910_FB20_026_5_ESP_And_Malaga	SAMEA114314513
FB20_026_6_ESP_And_Malaga	Hordeum bulbosum	GBS	2417911_FB20_026_6_ESP_And_Malaga	SAMEA114314514
FB20_026_8_ESP_And_Malaga	Hordeum bulbosum	GBS	2417912_FB20_026_8_ESP_And_Malaga	SAMEA114314515
FB20_027_1_ESP_And_Sevilla	Hordeum bulbosum	GBS	2417913_FB20_027_1_ESP_And_Sevilla	SAMEA114314516
FB20_027_3_ESP_And_Sevilla	Hordeum bulbosum	GBS	2417914_FB20_027_3_ESP_And_Sevilla	SAMEA114314517
FB20_027_4_ESP_And_Sevilla	Hordeum bulbosum	GBS	2417915_FB20_027_4_ESP_And_Sevilla	SAMEA114314518
FB20_027_5_ESP_And_Sevilla	Hordeum bulbosum	GBS	2417916_FB20_027_5_ESP_And_Sevilla	SAMEA114314519
FB20_028_1_ESP_And_Cadiz	Hordeum bulbosum	GBS	2417917_FB20_028_1_ESP_And_Cadiz	SAMEA114314520
FB20_028_3_ESP_And_Cadiz	Hordeum bulbosum	GBS	2417918_FB20_028_3_ESP_And_Cadiz	SAMEA114314521
FB20_028_4_ESP_And_Cadiz	Hordeum bulbosum	GBS	2417919_FB20_028_4_ESP_And_Cadiz	SAMEA114314522
FB20_028_6_ESP_And_Cadiz	Hordeum bulbosum	GBS	2417920_FB20_028_6_ESP_And_Cadiz	SAMEA114314523
FB20_029_1_ESP_And_Cadiz	Hordeum bulbosum	GBS	2417921_FB20_029_1_ESP_And_Cadiz	SAMEA114314524
FB20_029_3_ESP_And_Cadiz	Hordeum bulbosum	GBS	2417922_FB20_029_3_ESP_And_Cadiz	SAMEA114314525
FB20_029_4_ESP_And_Cadiz	Hordeum bulbosum	GBS	2417923_FB20_029_4_ESP_And_Cadiz	SAMEA114314526
FB20_029_5_ESP_And_Cadiz	Hordeum bulbosum	GBS	2417924_FB20_029_5_ESP_And_Cadiz	SAMEA114314527
FB20_029_6_ESP_And_Cadiz	Hordeum bulbosum	GBS	2417925_FB20_029_6_ESP_And_Cadiz	SAMEA114314528
FB20_029_7_ESP_And_Cadiz	Hordeum bulbosum	GBS	2417926_FB20_029_7_ESP_And_Cadiz	SAMEA114314529
FB20_030_2_ESP_And_Malaga	Hordeum bulbosum	GBS	2417927_FB20_030_2_ESP_And_Malaga	SAMEA114314530
FB20_030_3_ESP_And_Malaga	Hordeum bulbosum	GBS	2417928_FB20_030_3_ESP_And_Malaga	SAMEA114314531
FB20_031_1_ESP_And_Malaga	Hordeum bulbosum	GBS	2417929_FB20_031_1_ESP_And_Malaga	SAMEA114314532
FB20_031_6_ESP_And_Malaga	Hordeum bulbosum	GBS	2417930_FB20_031_6_ESP_And_Malaga	SAMEA114314533
FB20_011_7_ITA_Sic_Palermo	Hordeum bulbosum	GBS	2417931_FB20_011_7_ITA_Sic_Palermo	SAMEA114314534
FB20_012_4_ITA_Sic_Palermo	Hordeum bulbosum	GBS	2417932_FB20_012_4_ITA_Sic_Palermo	SAMEA114314535
FB20_019_5_ITA_Cal_Cosenza	Hordeum bulbosum	GBS	2417933_FB20_019_5_ITA_Cal_Cosenza	SAMEA114314536
FB19_037_9b_ALB_FanarPilake_dupl	Hordeum bulbosum	GBS	2417934_FB19_037_9b_ALB_FanarPilake_dupl	SAMEA114314537
FB20_019_7_ITA_Cal_Cosenza	Hordeum bulbosum	GBS	2417937_FB20_019_7_ITA_Cal_Cosenza	SAMEA114314538
FB20_026_7_ESP_And_Malaga	Hordeum bulbosum	GBS	2417938_FB20_026_7_ESP_And_Malaga	SAMEA114314539
FB20_028_5_ESP_And_Cadiz	Hordeum bulbosum	GBS	2417939_FB20_028_5_ESP_And_Cadiz	SAMEA114314540
FB20_030_1_ESP_And_Malaga	Hordeum bulbosum	GBS	2417940_FB20_030_1_ESP_And_Malaga	SAMEA114314541
FB20_031_3_ESP_And_Malaga	Hordeum bulbosum	GBS	2417941_FB20_031_3_ESP_And_Malaga	SAMEA114314542
FB20_031_4_ESP_And_Malaga	Hordeum bulbosum	GBS	2417942_FB20_031_4_ESP_And_Malaga	SAMEA114314543
FB20_031_5_ESP_And_Malaga	Hordeum bulbosum	GBS	2417943_FB20_031_5_ESP_And_Malaga	SAMEA114314544
FB20_010_4_ITA_Sic_Enna	Hordeum bulbosum	GBS	2417944_FB20_010_4_ITA_Sic_Enna	SAMEA114314545
FB20_004_5_ITA_Apu_CdM	Hordeum bulbosum	GBS	2417945_FB20_004_5_ITA_Apu_CdM	SAMEA114314546
GRA_2626_1_ALB_Shkoder	Hordeum bulbosum	GBS	2417946_GRA_2626_1_ALB_Shkoder	SAMEA114314547
GRA_2626_2_ALB_Shkoder	Hordeum bulbosum	GBS	2417947_GRA_2626_2_ALB_Shkoder	SAMEA114314548
GRA_2626_3_ALB_Shkoder	Hordeum bulbosum	GBS	2417948_GRA_2626_3_ALB_Shkoder	SAMEA114314549
GRA_905_1_UZB_4x	Hordeum bulbosum	GBS	2417949_GRA_905_1_UZB_4x	SAMEA114314550
GRA_905_2_UZB_4x	Hordeum bulbosum	GBS	2417950_GRA_905_2_UZB_4x	SAMEA114314551
GRA_945_1_ISR_4x	Hordeum bulbosum	GBS	2417951_GRA_945_1_ISR_4x	SAMEA114314552
GRA_945_2_ISR_4x	Hordeum bulbosum	GBS	2417952_GRA_945_2_ISR_4x	SAMEA114314553
GRA_1015_1_UKR_4x	Hordeum bulbosum	GBS	2417953_GRA_1015_1_UKR_4x	SAMEA114314554
GRA_1015_2_UKR_4x	Hordeum bulbosum	GBS	2417954_GRA_1015_2_UKR_4x	SAMEA114314555
GRA_1031_1_TUR_4x	Hordeum bulbosum	GBS	2417955_GRA_1031_1_TUR_4x	SAMEA114314556
GRA_1031_2_TUR_4x	Hordeum bulbosum	GBS	2417956_GRA_1031_2_TUR_4x	SAMEA114314557
GRA_1193_1_TJK_4x	Hordeum bulbosum	GBS	2417957_GRA_1193_1_TJK_4x	SAMEA114314558
GRA_1193_2_TJK_4x	Hordeum bulbosum	GBS	2417958_GRA_1193_2_TJK_4x	SAMEA114314559
GRA_2256_1_TJK_4x	Hordeum bulbosum	GBS	2417959_GRA_2256_1_TJK_4x	SAMEA114314560
GRA_2256_2_TJK_4x	Hordeum bulbosum	GBS	2417960_GRA_2256_2_TJK_4x	SAMEA114314561
GRA_2795_1_BGR_4x	Hordeum bulbosum	GBS	2417961_GRA_2795_1_BGR_4x	SAMEA114314562
GRA_2795_2_BGR_4x	Hordeum bulbosum	GBS	2417962_GRA_2795_2_BGR_4x	SAMEA114314563
GRA_2801_1_BGR_4x	Hordeum bulbosum	GBS	2417963_GRA_2801_1_BGR_4x	SAMEA114314564
GRA_2801_2_BGR_4x	Hordeum bulbosum	GBS	2417964_GRA_2801_2_BGR_4x	SAMEA114314565
GRA_3221_1_ARM_4x	Hordeum bulbosum	GBS	2417965_GRA_3221_1_ARM_4x	SAMEA114314566
GRA_3221_2_ARM_4x	Hordeum bulbosum	GBS	2417966_GRA_3221_2_ARM_4x	SAMEA114314567
BCC2018_TJK_4x	Hordeum bulbosum	GBS	2417967_BCC2018_TJK_4x	SAMEA114314568
BCC2061_ITA_Sic_Palermo	Hordeum bulbosum	GBS	2417968_BCC2061_ITA_Sic_Palermo	SAMEA114314569
F2295_H_vulgare_spon_IRN	Hordeum bulbosum	GBS	2417969_F2295_H_vulgare_spon_IRN	SAMEA114314570
F2314_H_vulgare_spon_IRN	Hordeum bulbosum	GBS	2417970_F2314_H_vulgare_spon_IRN	SAMEA114314571
F2426_H_vulgare_spon_IRN	Hordeum bulbosum	GBS	2417971_F2426_H_vulgare_spon_IRN	SAMEA114314572
FB19_037_9c_ALB_FanarPilake_dup2	Hordeum bulbosum	GBS	2417972_FB19_037_9c_ALB_FanarPilake_dup2	SAMEA114314573
HS28810	Hordeum bulbosum	GBS	2448341_HS28810	SAMEA114314574
HS29921	Hordeum bulbosum	GBS	2448342_HS29921	SAMEA114314575
HS28740	Hordeum bulbosum	GBS	2448343_HS28740	SAMEA114314576
HS28394	Hordeum bulbosum	GBS	2448344_HS28394	SAMEA114314577
HS30181	Hordeum bulbosum	GBS	2448345_HS30181	SAMEA114314578
HS28233	Hordeum bulbosum	GBS	2448346_HS28233	SAMEA114314579
HS28622	Hordeum bulbosum	GBS	2448347_HS28622	SAMEA114314580
HS28161	Hordeum bulbosum	GBS	2448348_HS28161	SAMEA114314581
HS28444	Hordeum bulbosum	GBS	2448349_HS28444	SAMEA114314582
HS30123	Hordeum bulbosum	GBS	2448350_HS30123	SAMEA114314583
HS28890	Hordeum bulbosum	GBS	2448351_HS28890	SAMEA114314584
HS29654	Hordeum bulbosum	GBS	2448352_HS29654	SAMEA114314585
HS28561	Hordeum bulbosum	GBS	2448353_HS28561	SAMEA114314586
HS29194	Hordeum bulbosum	GBS	2448354_HS29194	SAMEA114314587
HS29954	Hordeum bulbosum	GBS	2448355_HS29954	SAMEA114314588
HS28322	Hordeum bulbosum	GBS	2448356_HS28322	SAMEA114314589
HS28261	Hordeum bulbosum	GBS	2448357_HS28261	SAMEA114314590
HS28680	Hordeum bulbosum	GBS	2448358_HS28680	SAMEA114314591
HS28690	Hordeum bulbosum	GBS	2448359_HS28690	SAMEA114314592
HS28700	Hordeum bulbosum	GBS	2448360_HS28700	SAMEA114314593
HS28730	Hordeum bulbosum	GBS	2448361_HS28730	SAMEA114314594
HS28750	Hordeum bulbosum	GBS	2448362_HS28750	SAMEA114314595
HS28760	Hordeum bulbosum	GBS	2448363_HS28760	SAMEA114314596
HS28770	Hordeum bulbosum	GBS	2448364_HS28770	SAMEA114314597
HS28800	Hordeum bulbosum	GBS	2448365_HS28800	SAMEA114314598
HS28800	Hordeum bulbosum	GBS	2448366_HS28800	SAMEA114314599
HS28272	Hordeum bulbosum	GBS	2448367_HS28272	SAMEA114314600
HS28394	Hordeum bulbosum	GBS	2448368_HS28394	SAMEA114314601
HS28444	Hordeum bulbosum	GBS	2448369_HS28444	SAMEA114314602
HS28670	Hordeum bulbosum	GBS	2448370_HS28670	SAMEA114314603
HS28890	Hordeum bulbosum	GBS	2448371_HS28890	SAMEA114314604
HS29194	Hordeum bulbosum	GBS	2448372_HS29194	SAMEA114314605
HS29333	Hordeum bulbosum	GBS	2448373_HS29333	SAMEA114314606
HS29604	Hordeum bulbosum	GBS	2448374_HS29604	SAMEA114314607
HS29654	Hordeum bulbosum	GBS	2448375_HS29654	SAMEA114314608
HS29704	Hordeum bulbosum	GBS	2448376_HS29704	SAMEA114314609
HS29904	Hordeum bulbosum	GBS	2448377_HS29904	SAMEA114314610
HS29954	Hordeum bulbosum	GBS	2448378_HS29954	SAMEA114314611
HS30123	Hordeum bulbosum	GBS	2448379_HS30123	SAMEA114314612
HS30181	Hordeum bulbosum	GBS	2448380_HS30181	SAMEA114314613
