# Supplementary material for: A haplotype-resolved pangenome of the barley wild relative Hordeum bulbosum
Source: Research Square preprint supplement (doi:10.21203/rs.3.rs-3916840/v1), 2024-02-08
Supplement: Supplementary file 12 [file 953bb09dbbbb294fddfd848b.xlsx]

## Sheet: Sheet1
	Sequence assembly	Sequence assembly after hybrid scaffolding	Hybrid scaffolds only
No of contigs/scaffolds	750	422	190
Total length (Mb)	3632.5	4380.4	4352.9
Contig/scaffold N50 (Mb)	9.6	63.1	63.1
