# Supplementary material for: A haplotype-resolved pangenome of the barley wild relative Hordeum bulbosum
Source: Research Square preprint supplement (doi:10.21203/rs.3.rs-3916840/v1), 2024-02-08
Supplement: Supplementary file 13 [file a37ba39620355b9326610ffb.xlsx]

## Sheet: pangenome WGS raw data
Accession	Species	Library type	Sample Name BioSamples	BioSamples ID
A17	Hordeum bulbosum	HiFi	HiFi_A17	SAMEA114302036
A40	Hordeum bulbosum	HiFi	HiFi_A40	SAMEA114302037
A42	Hordeum bulbosum	HiFi	HiFi_A42	SAMEA114302038
FB19_001_1	Hordeum bulbosum	HiFi	HiFi_FB19_001_1	SAMEA114302039
FB19_011_3	Hordeum bulbosum	HiFi	HiFi_FB19_011_3	SAMEA114302040
FB19_028_3	Hordeum bulbosum	HiFi	HiFi_FB19_028_3	SAMEA114302041
FB20_005_1	Hordeum bulbosum	HiFi	HiFi_FB20_005_1	SAMEA114302042
FB20_029_7	Hordeum bulbosum	HiFi	HiFi_FB20_029_7	SAMEA114302043
GRA2256_1	Hordeum bulbosum	HiFi	HiFi_GRA2256_1	SAMEA114302044
PI365428	Hordeum bulbosum	HiFi	HiFi_PI365428	SAMEA114302045
JKI-5215	Introgression lines	HiFi	HiFi_BC5215	SAMEA115029393
A17	Hordeum bulbosum	Hi-C	HiC_A17	SAMEA114302046
A40	Hordeum bulbosum	Hi-C	HiC_A40	SAMEA114302047
A42	Hordeum bulbosum	Hi-C	HiC_A42	SAMEA114302048
FB19_001_1	Hordeum bulbosum	Hi-C	HiC_FB19_001_1	SAMEA114302049
FB19_011_3	Hordeum bulbosum	Hi-C	HiC_FB19_011_3	SAMEA114302050
FB19_028_3	Hordeum bulbosum	Hi-C	HiC_FB19_028_3	SAMEA114302051
FB20_005_1	Hordeum bulbosum	Hi-C	HiC_FB20_005_1	SAMEA114302052
FB20_029_7	Hordeum bulbosum	Hi-C	HiC_FB20_029_7	SAMEA114302053
GRA2256_1	Hordeum bulbosum	Hi-C	HiC_GRA2256_1	SAMEA114302054
PI365428	Hordeum bulbosum	Hi-C	HiC_PI365428	SAMEA114302055
JKI-5215	Introgression lines	Hi-C	HiC_BC5215	SAMEA115029394
