# Supplementary material for: A haplotype-resolved pangenome of the barley wild relative Hordeum bulbosum
Source: Research Square preprint supplement (doi:10.21203/rs.3.rs-3916840/v1), 2024-02-08
Supplement: Supplementary file 14 [file b279396228ba5c9d1c407093.xlsx]

## Sheet: Sheet1
	Sequence assembly	Sequence assembly after hybrid scaffolding	Hybrid scaffolds only
No of contigs/scaffolds	696	409	185
Total length (Mb)	3592.7	4402.7	4389.2
Contig/scaffold N50 (Mb)	10.4	63	63.0
