# Supplementary material for: A haplotype-resolved pangenome of the barley wild relative Hordeum bulbosum
Source: Research Square preprint supplement (doi:10.21203/rs.3.rs-3916840/v1), 2024-02-08
Supplement: Supplementary file 15 [file bf93730411e790565eff4861.xlsx]

## Sheet: pangenome assemblies
Accession	Species	Collection country	Ploidy	Sample Name BioSamples	BioSamples ID Assembly	GCA_accession	Assembly Name
FB19_011_3	Hordeum bulbosum	Greece	Diploid	Assembly_FB19_011_3	SAMEA114382180	GCA_963514045	Hbulbosum_FB19_011_3
FB20_029_7	Hordeum bulbosum	Spain	Diploid	Assembly_FB20_029_7	SAMEA114382183	GCA_963555535	Hbulbosum_FB20_029_7
FB20_005_1	Hordeum bulbosum	Italy	Diploid	Assembly_FB20_005_1	SAMEA114382182	GCA_963555525	Hbulbosum_FB20_005_1
PI365428	Hordeum bulbosum	Libya	Diploid	Assembly_PI365428	SAMEA114382185	GCA_963513915	Hbulbosum_Hbulbosum_PI365428
FB19_001_1	Hordeum bulbosum	Greece	Tetraploid	Assembly_FB19_001_1	SAMEA114382179	GCA_963514065	Hbulbosum_FB19_001_1
FB19_028_3	Hordeum bulbosum	Greece	Tetraploid	Assembly_FB19_028_3	SAMEA114382181	GCA_963555515	Hbulbosum_FB19_028_3
GRA2256_1	Hordeum bulbosum	Tajikistan	Tetraploid	Assembly_GRA2256_1	SAMEA114382184	GCA_963555545	Hbulbosum_GRA2256_1
A17	Hordeum bulbosum	Unknown	Tetraploid	Assembly_A17	SAMEA114382176	GCA_963514015	Hbulbosum_A17
A40	Hordeum bulbosum	Unknown	Tetraploid	Assembly_A40	SAMEA114382177	GCA_963514025	Hbulbosum_A40
A42	Hordeum bulbosum	Unknown	Tetraploid	Assembly_A42	SAMEA114382178	GCA_963514035	Hbulbosum_A42
JKI-5215	Introgression lines	Unknown	Diploid	Assembly_BC5215	SAMEA115029395	GCA_963876895	Hvulgare_BC5215
