# Supplementary material for: A haplotype-resolved pangenome of the barley wild relative Hordeum bulbosum
Source: Research Square preprint supplement (doi:10.21203/rs.3.rs-3916840/v1), 2024-02-08
Supplement: Supplementary file 16 [file f48de319f00be80e5bb59fa7.xlsx]

## Sheet: RNA-Seq and Iso-Seq raw data
Accession	Species	Library type	Tissue	Sample Name BioSamples	BioSamples ID
FB19_011_3	Hordeum bulbosum	RNA-Seq	root	H_bulb_root_RNA_1	SAMEA112738140
FB19_011_3	Hordeum bulbosum	RNA-Seq	bulb	H_bulb_bulb_RNA_2	SAMEA114304145
FB19_011_3	Hordeum bulbosum	RNA-Seq	stalk	H_bulb_stalk_RNA_3	SAMEA114304146
FB19_011_3	Hordeum bulbosum	RNA-Seq	flower	H_bulb_infl_flowers_RNA_4	SAMEA114304147
FB19_011_3	Hordeum bulbosum	RNA-Seq	flagleaf	H_bulb_flagleaf_RNA_5	SAMEA114304148
FB19_011_3	Hordeum bulbosum	RNA-Seq	leaf	H_bulb_leaf_RNA_6	SAMEA114304149
FB19_011_3	Hordeum bulbosum	Iso-Seq	pool of six tissues (root, bulb, stalk, inflorescence, flagleaf, leaf)	Iso_023_Hordeum_bulbosum	SAMEA114304150
